# Supplementary material for: Diruthenium and triruthenium compounds of the potential redox active non-chelated η1-N,η1-N-benzothiadiazole bridge
Source: Royal Society of Chemistry journal article supplement (doi:10.1039/d2dt00533f), 2022-01-01
Supplement: d2dt00533f1.pdf [file d2dt00533f1.pdf]

## **Supporting Information**

### **Diruthenium and triruthenium compounds of the potential redox active non-chelated $\eta^1$ -N, $\eta^1$ -N-benzothiadiazole bridge**

Sanchaita Dey,\*<sup>a</sup> Arijit Singha Hazari,<sup>a</sup> Shaikh M. Mobin<sup>b</sup> and Goutam Kumar Lahiri\*<sup>a</sup>

<sup>a</sup>*Department of Chemistry, Indian Institute of Technology Bombay, Powai, Mumbai-400076, India*

<sup>b</sup>*Discipline of Chemistry, Indian Institute of Technology Indore, Simrol, Khandwa Road, Indore-453552, India*

Email: [lahiri@chem.iitb.ac.in](mailto:lahiri@chem.iitb.ac.in)(G.K.L)

[sanchaitadey93@gmail.com](mailto:sanchaitadey93@gmail.com)(S.D)

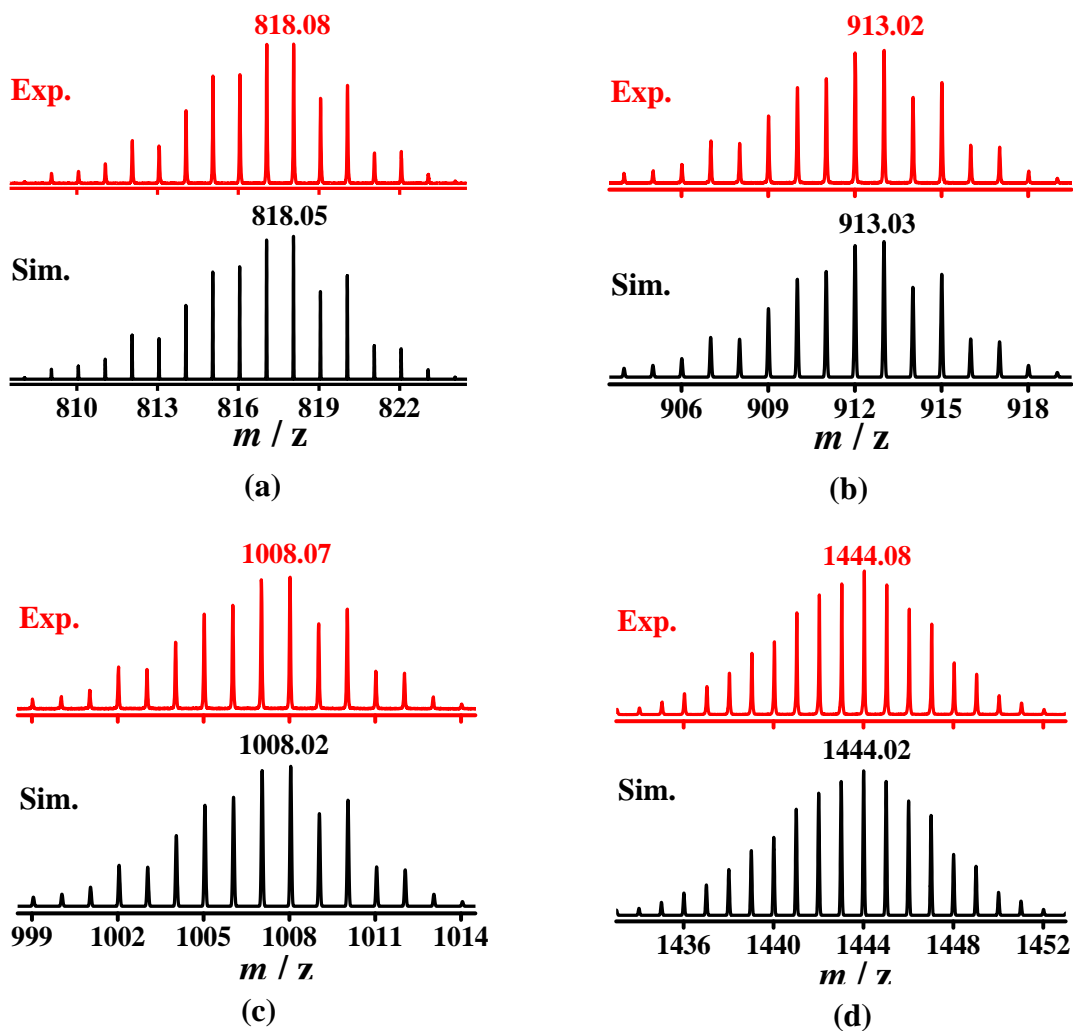

**Fig. S1** Experimental and simulated ESI(+) mass spectra of (a)  $\{1\}^+$ , (b)  $\{2\}^+$ , (c)  $\{3\}^+$  and (d)  $\{4\}^+$  in  $\text{CH}_3\text{CN}$ .

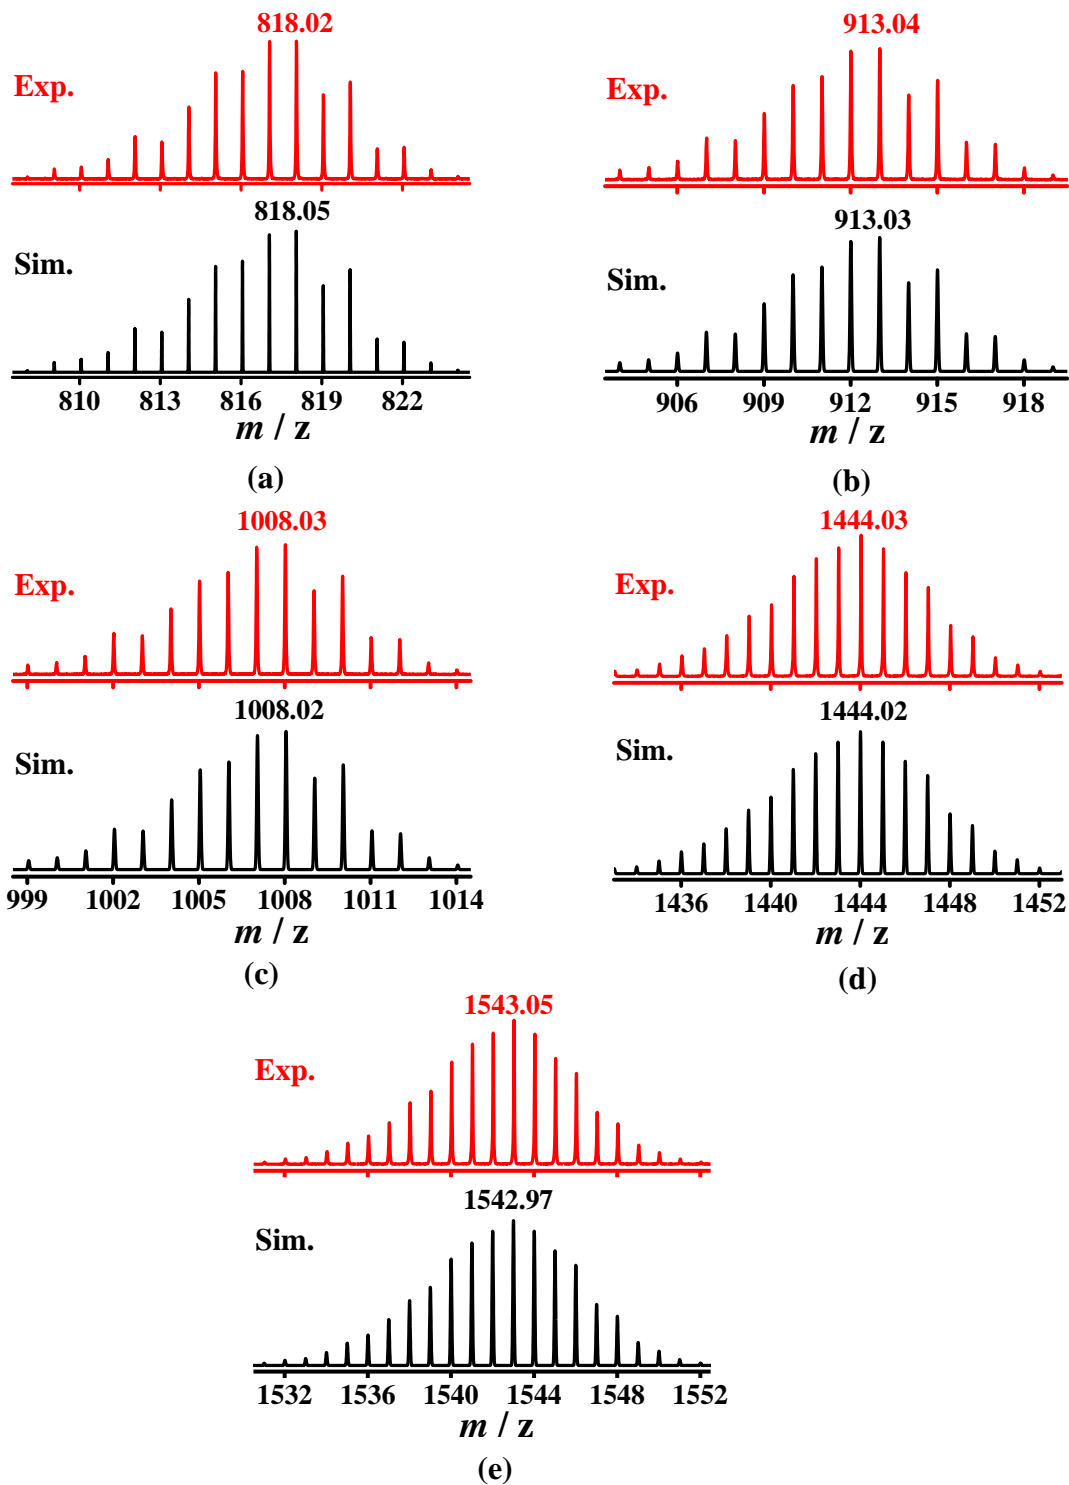

**Fig. S2** Experimental and simulated ESI(+) mass spectra of (a)  $\{([1]\text{ClO}_4)\text{-ClO}_4\}^+$ , (b)  $\{([2]\text{ClO}_4)\text{-ClO}_4\}^+$ , (c)  $\{([3]\text{ClO}_4)\text{-ClO}_4\}^+$ , (d)  $\{([4]\text{ClO}_4)\text{-ClO}_4\}^+$  and (e)  $\{([4](\text{ClO}_4)_2)\text{-ClO}_4\}^+$  in CH<sub>3</sub>CN.

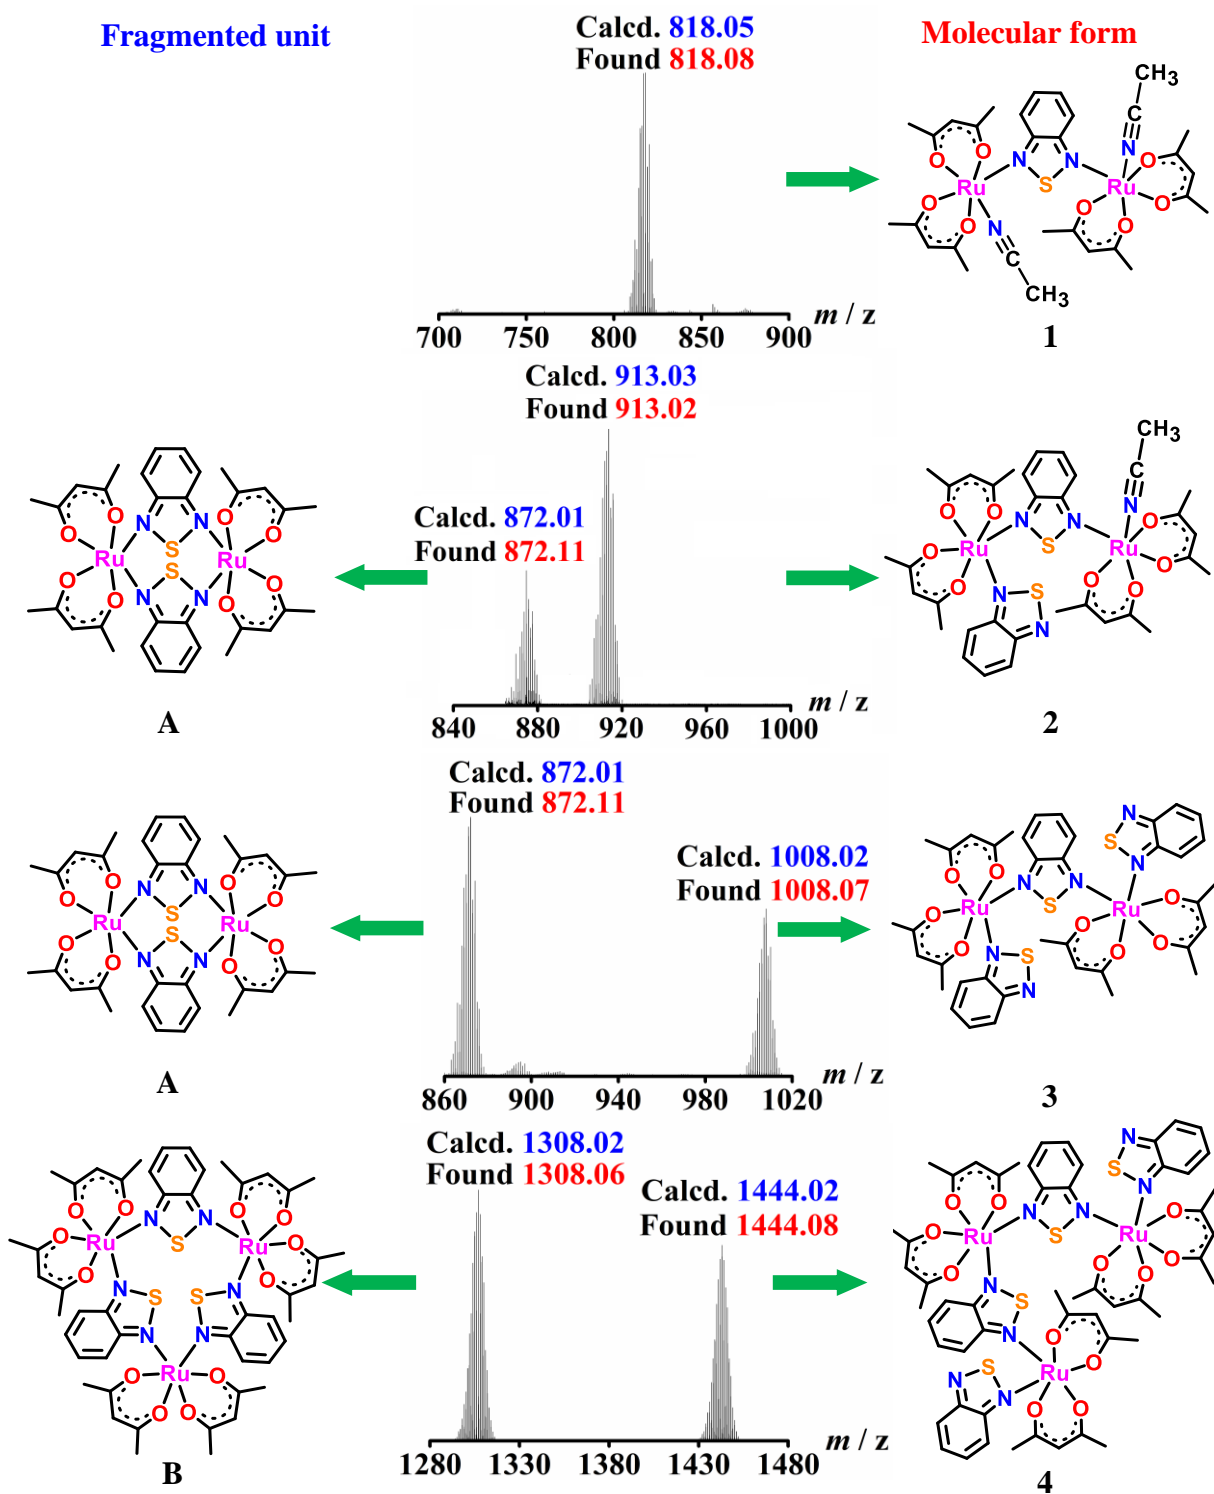

Fig. S3 ESI-mass of 1-4 in CH<sub>3</sub>CN.



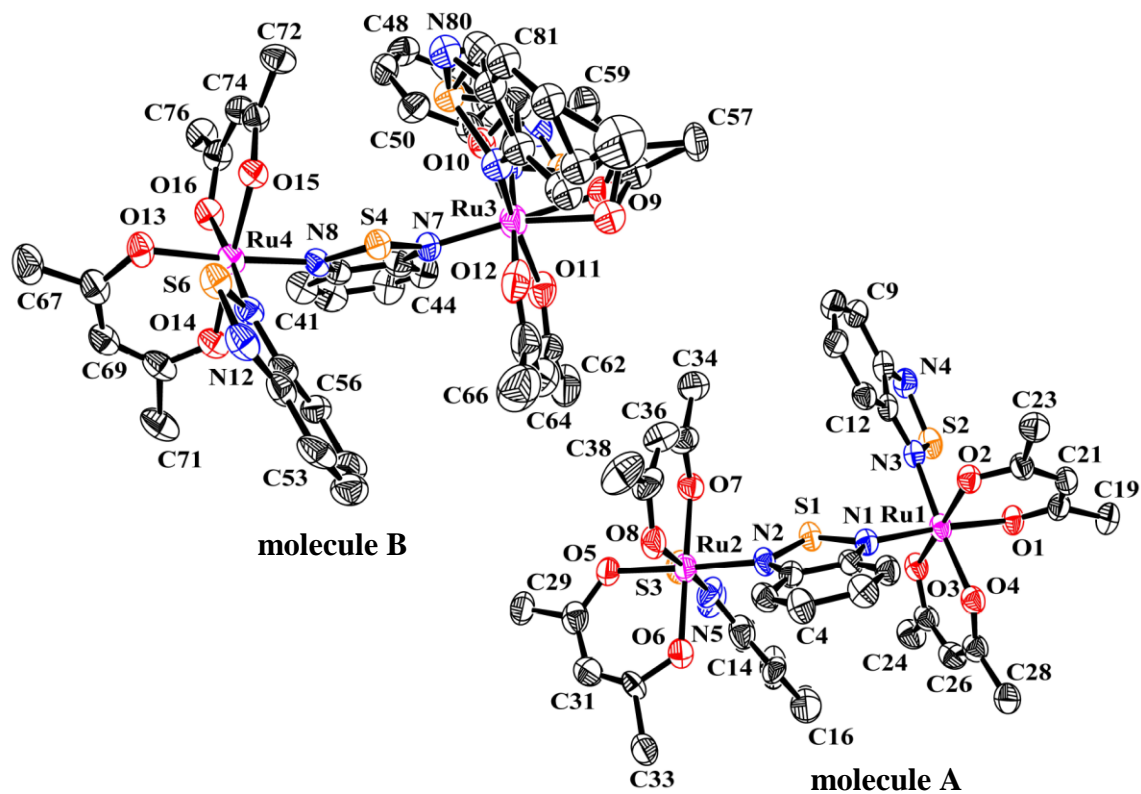

**Fig. S4** Perspective view of  $[3]ClO_4$ . Asymmetric unit of  $[3]ClO_4$  contains two molecules, (molecule A and molecule B). Ellipsoids are drawn at 30% probability level. Hydrogen atoms are omitted for clarity.

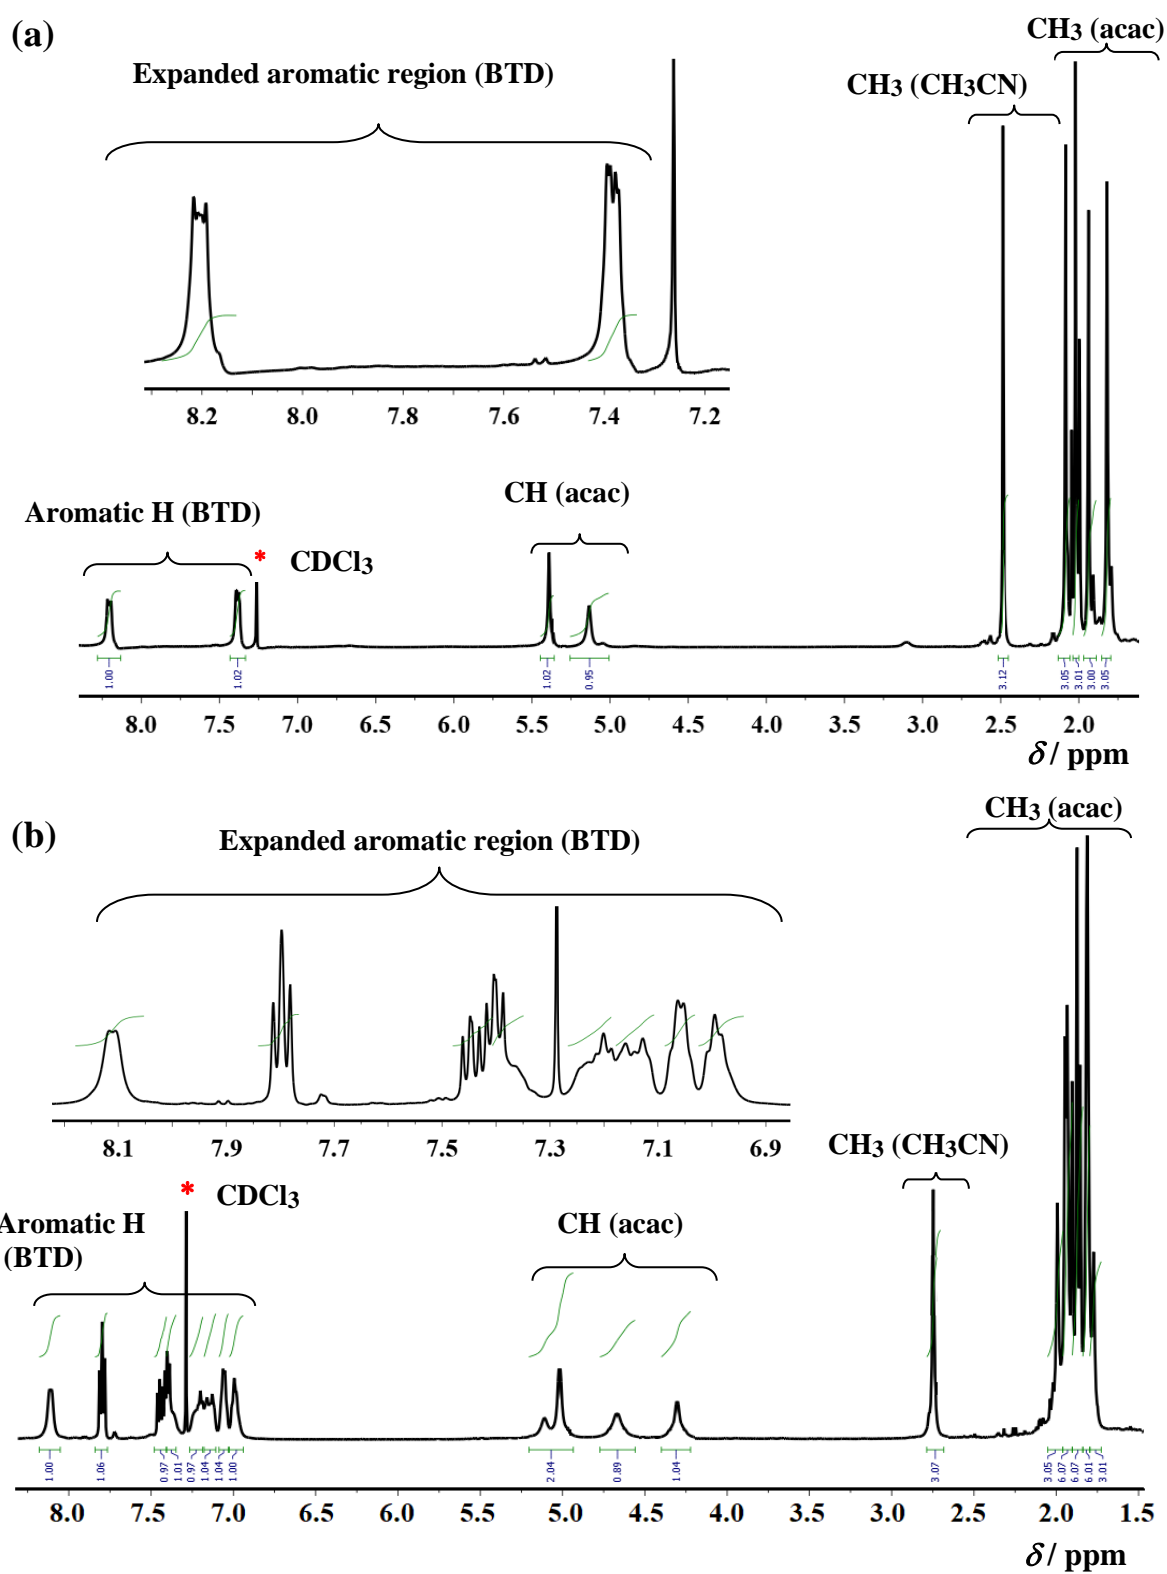

**Fig. S5A** <sup>1</sup>H NMR of (a) **1** and (b) **2** in CDCl<sub>3</sub> with TMS ( $\delta$  = 0 ppm) as internal standard. Inset shows the segmented spectrum.

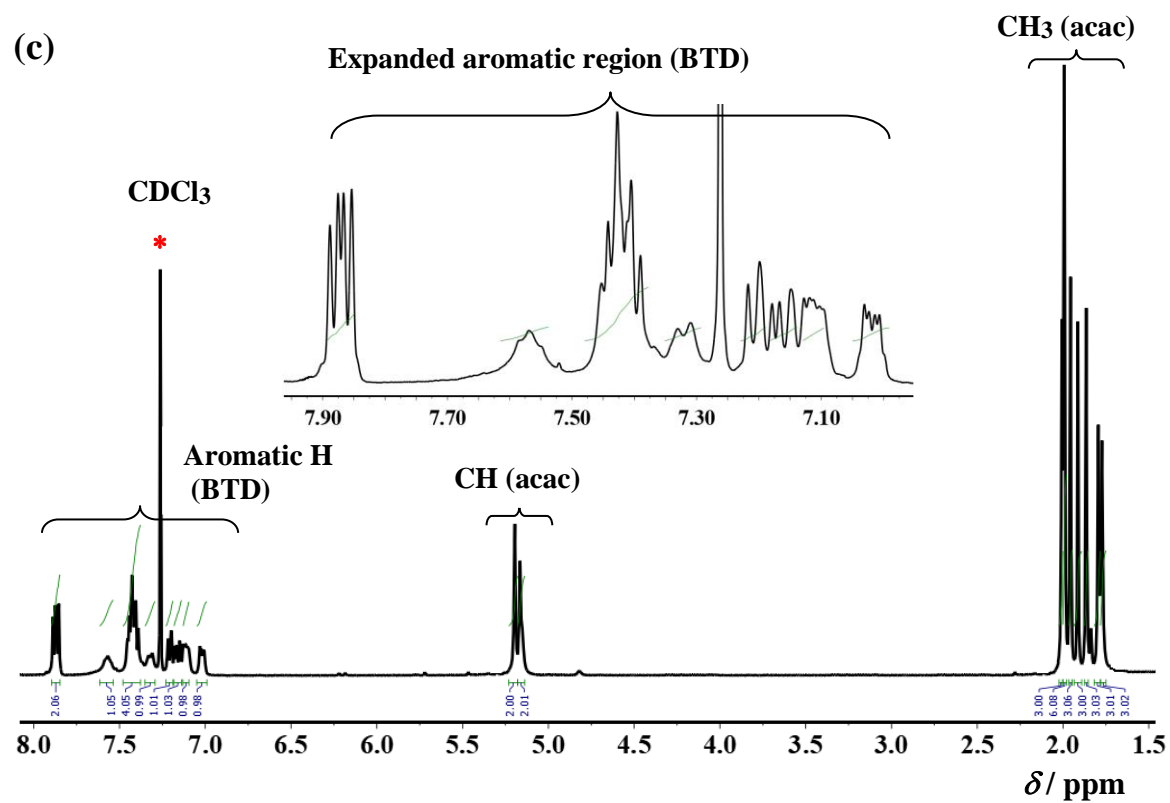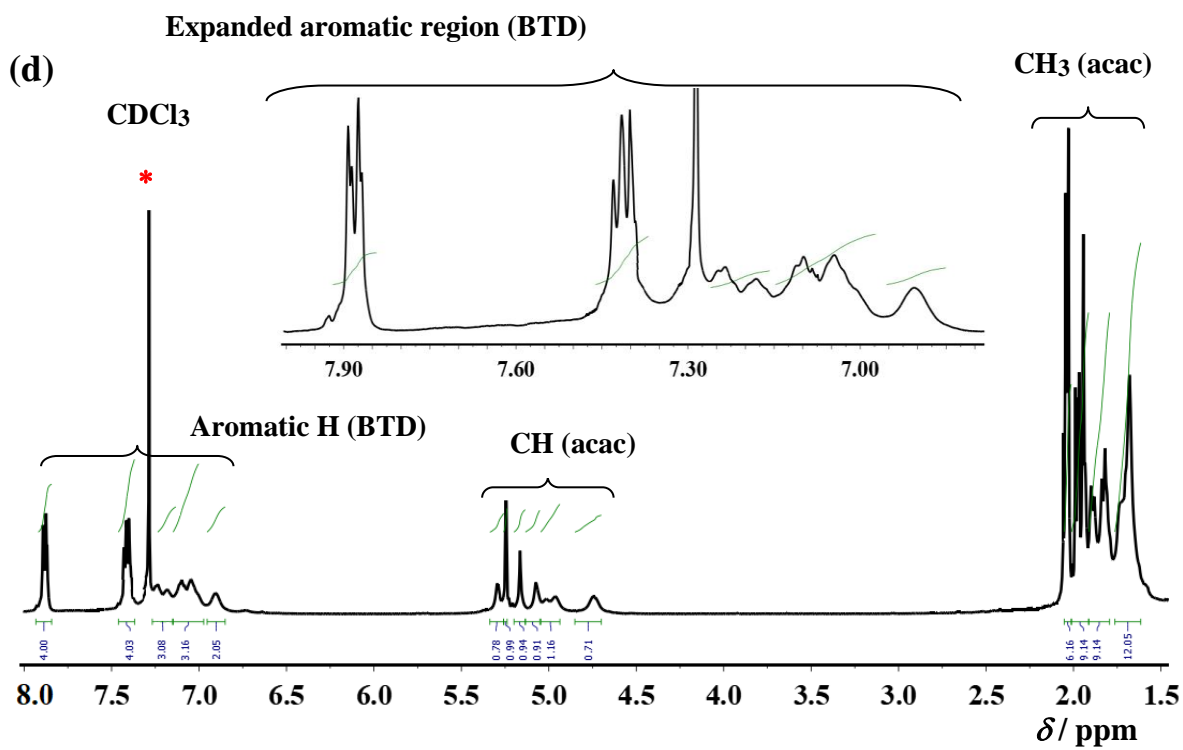

**Fig. S5B** <sup>1</sup>H NMR of (a) **3** and (b) **4** in CDCl<sub>3</sub> with TMS ( $\delta = 0$  ppm) as internal standard. Inset shows the segmented spectrum.

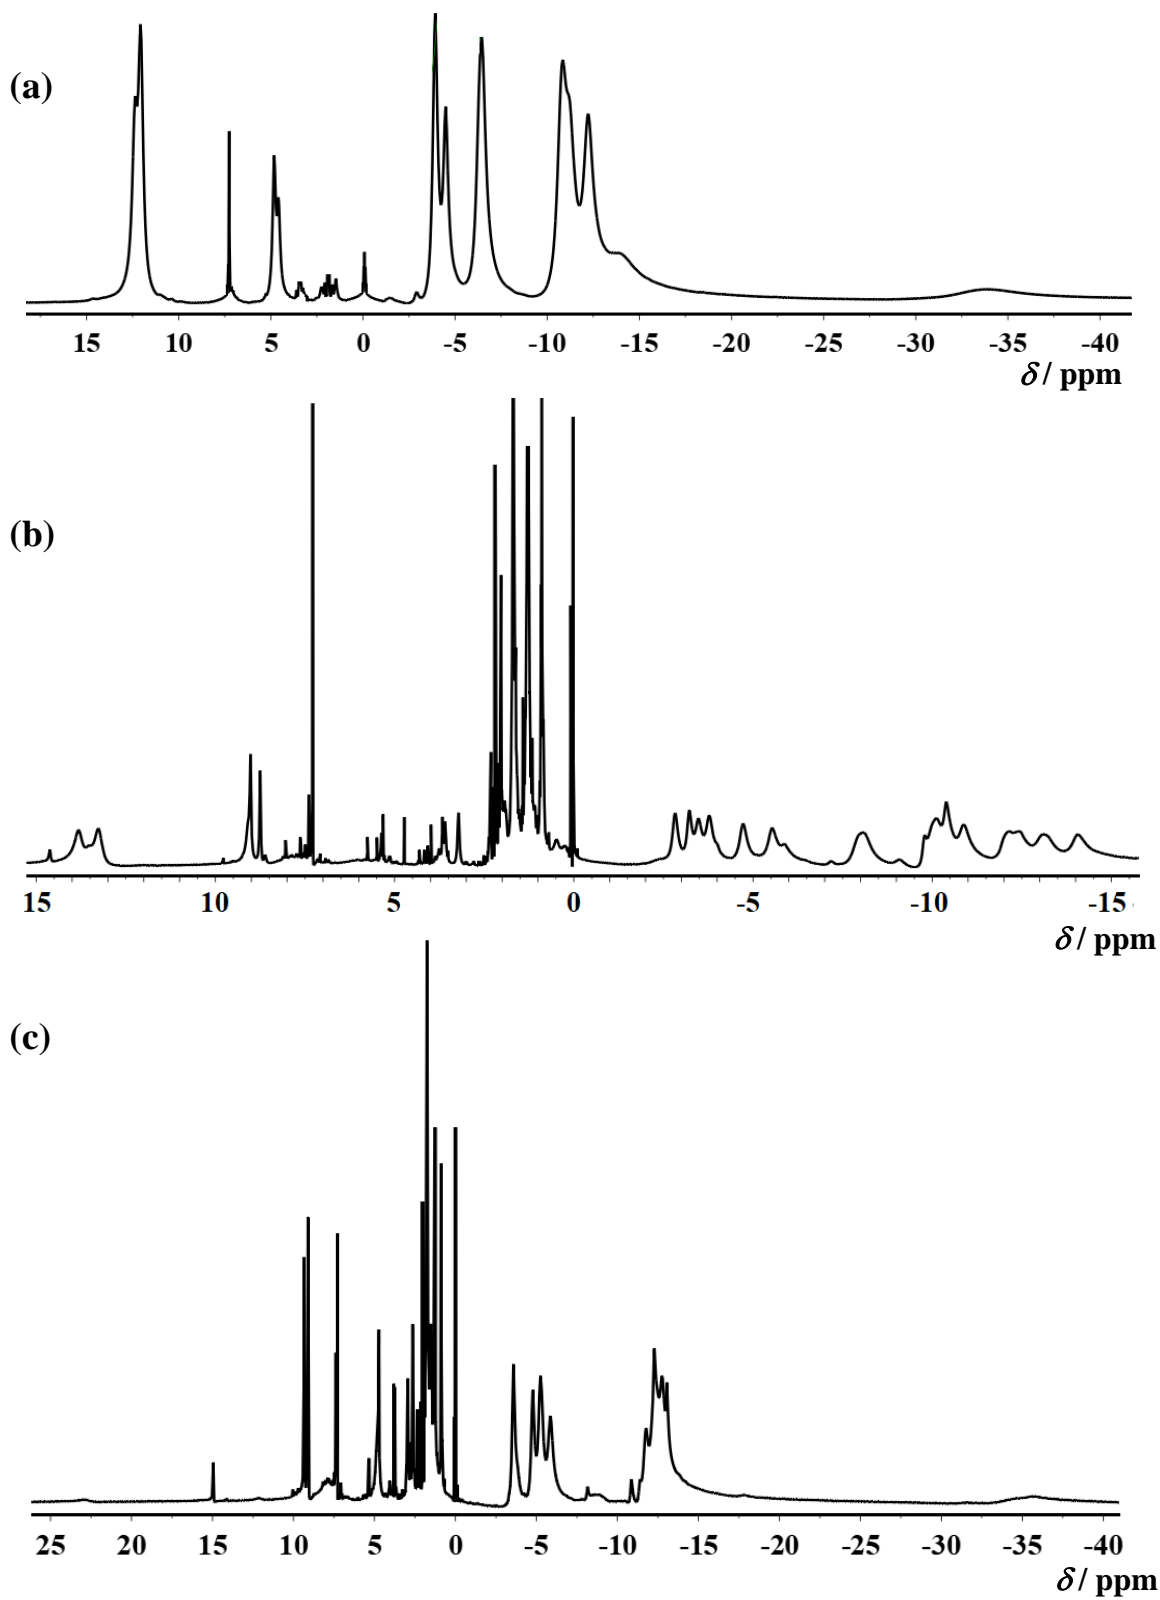

**Fig. S6A**  $^1\text{H}$  NMR of (a) [1] $\text{ClO}_4$ , (b) [2] $\text{ClO}_4$  and (c) [3] $\text{ClO}_4$  in  $\text{CDCl}_3$  with TMS ( $\delta = 0$  ppm) as internal standard.

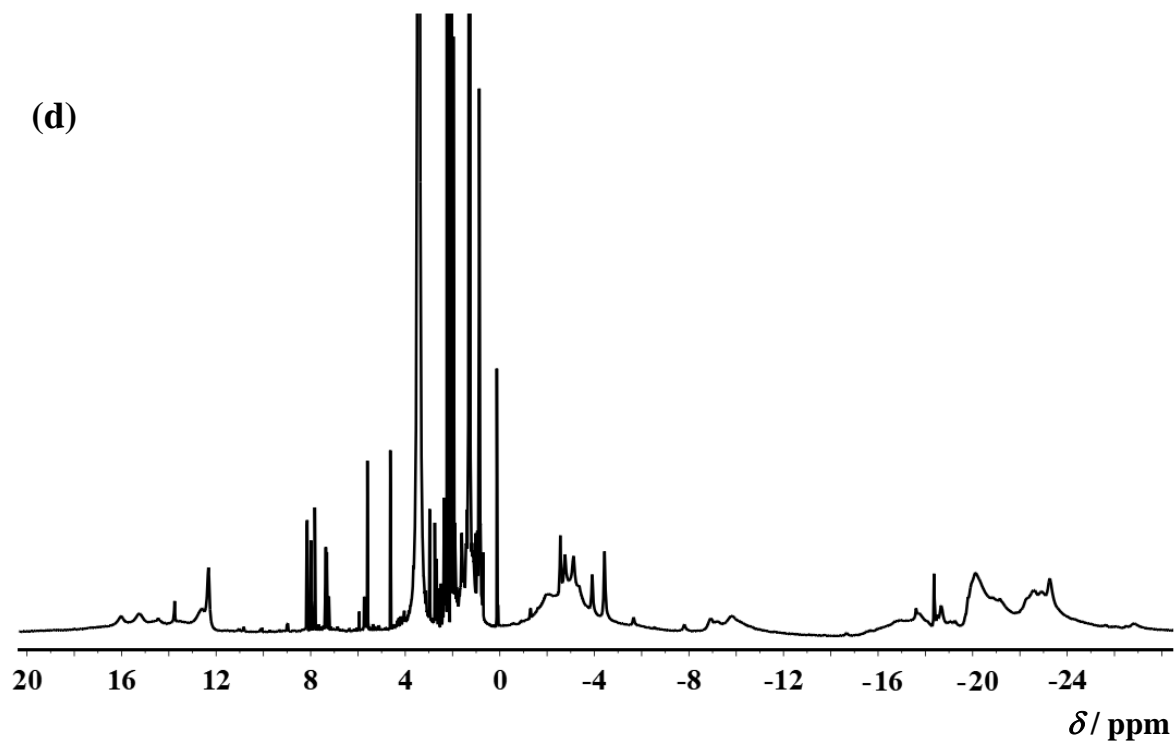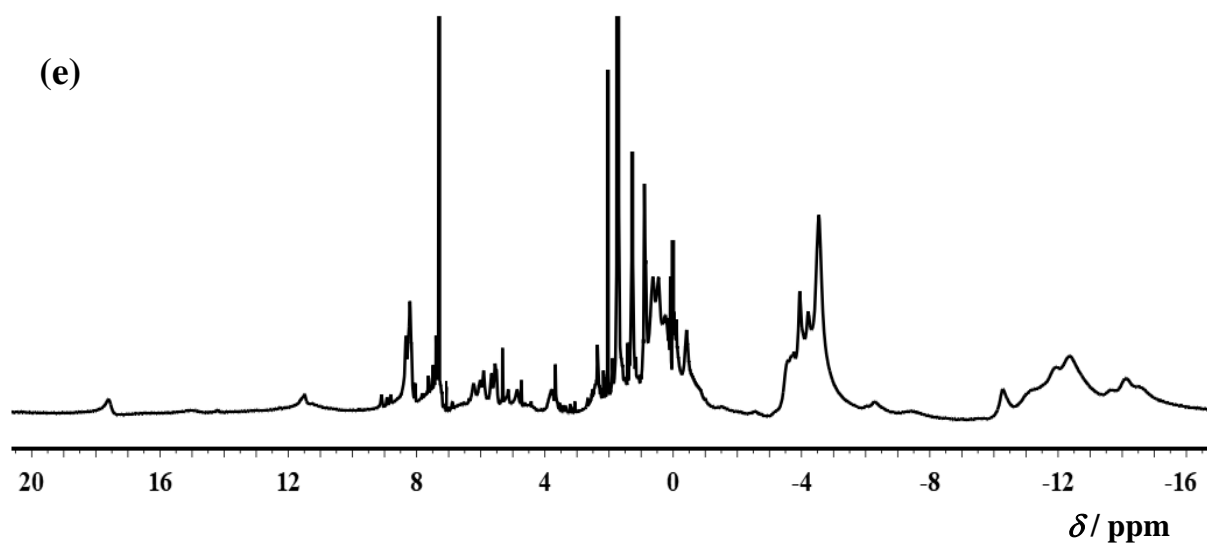

**Fig. S6B**  $^1\text{H}$  NMR of (d)  $[\mathbf{4}]\text{ClO}_4$  and (e)  $[\mathbf{4}](\text{ClO}_4)_2$  in  $\text{CDCl}_3$  with TMS ( $\delta = 0$  ppm) as internal standard.

### Determination of solution magnetic moments (Evans method) of [1]ClO<sub>4</sub>-[4]ClO<sub>4</sub>

Solution magnetic moments of ruthenium (III) complexes [1]ClO<sub>4</sub>-[4]ClO<sub>4</sub> were determined by Evans method. Each of the pure complexes in CDCl<sub>3</sub> was taken in a 5 mm NMR tube. In another coaxial NMR tube only reference CDCl<sub>3</sub> solvent was taken. Proton NMR of each sample together with the Evans tube was recorded, which showed two peaks corresponding to the solvent residual peak of CDCl<sub>3</sub> in the sample and reference. The shifts in the position due to the paramagnetic Ru(III) were noted. Experiments were carried out in 400 MHz NMR spectrometer at 298 K.

$$\chi_g = \frac{-3\Delta f}{4\pi\nu_0 m} + \chi_0 + \frac{\chi_0(d_0 - d_s)}{m} \quad \text{..... eq. 1}$$

The mass susceptibility ( $\chi_g$ ) was calculated using eq. 1, where  $\Delta f$  (Hz),  $\nu_0$  (Hz),  $m$  (g/cm<sup>3</sup>),  $d_0/d_s$  and  $\chi_0$  corresponded to shift in frequency, operating frequency of NMR spectrometer, concentration of the substance, densities of pure solvent and solution, and mass susceptibility of the solvent, respectively. The molar susceptibility ( $\chi_m$ ) was obtained by multiplying the mass susceptibility ( $\chi_g$ ) by the molar mass. This results were used to calculate the effective magnetic moment  $\mu_{\text{eff}}$  in eq. 2.

$$\mu_{\text{eff}} = 2.83 \times (\chi_M T)^{1/2} \quad \text{BM} \quad \text{..... eq. 2}$$

#### Calculation for [1]ClO<sub>4</sub>:

3.3 mg of [1]ClO<sub>4</sub> was dissolved in ~0.55 cm<sup>3</sup> of CDCl<sub>3</sub>. The shift in the position due to the paramagnetic Ru(III) = 0.037 ppm.

$$\begin{aligned} \chi_M &= 137.2 \times 10^{-5} \text{ cm}^3/\text{mol} \\ \mu_{\text{eff}} &= 2.83 \times (137.2 \times 10^{-5} \times 298.15)^{1/2} \text{ BM} \\ &= 1.81 \text{ BM} \end{aligned}$$

Calculation for [2]ClO<sub>4</sub>:

3.5 mg of [2]ClO<sub>4</sub> was dissolved in ~0.55 cm<sup>3</sup> of CDCl<sub>3</sub>. The shift in the position due to the paramagnetic Ru(III) = 0.035 ppm.

$$\begin{aligned}\chi_M &= 132.7 \times 10^{-5} \text{ cm}^3/\text{mol} \\ \mu_{\text{eff}} &= 2.83 \times (132.7 \times 10^{-5} \times 298.15)^{1/2} \text{ BM} \\ &= 1.78 \text{ BM}\end{aligned}$$

Calculation for [3]ClO<sub>4</sub>:

3.2 mg of [3]ClO<sub>4</sub> was dissolved in ~0.53 cm<sup>3</sup> of CDCl<sub>3</sub>. The shift in the position due to the paramagnetic Ru(III) = 0.032 ppm.

$$\begin{aligned}\chi_M &= 139.9 \times 10^{-5} \text{ cm}^3/\text{mol} \\ \mu_{\text{eff}} &= 2.83 \times (139.9 \times 10^{-5} \times 298.15)^{1/2} \text{ BM} \\ &= 1.83 \text{ BM}\end{aligned}$$

Calculation for [4]ClO<sub>4</sub>:

3.8 mg of [4]ClO<sub>4</sub> was dissolved in ~0.50 cm<sup>3</sup> of CDCl<sub>3</sub>. The shift in the position due to the paramagnetic Ru(III) = 0.028 ppm.

$$\begin{aligned}\chi_M &= 135.5 \times 10^{-5} \text{ cm}^3/\text{mol} \\ \mu_{\text{eff}} &= 2.83 \times (135.5 \times 10^{-5} \times 298.15)^{1/2} \text{ BM} \\ &= 1.80 \text{ BM}\end{aligned}$$

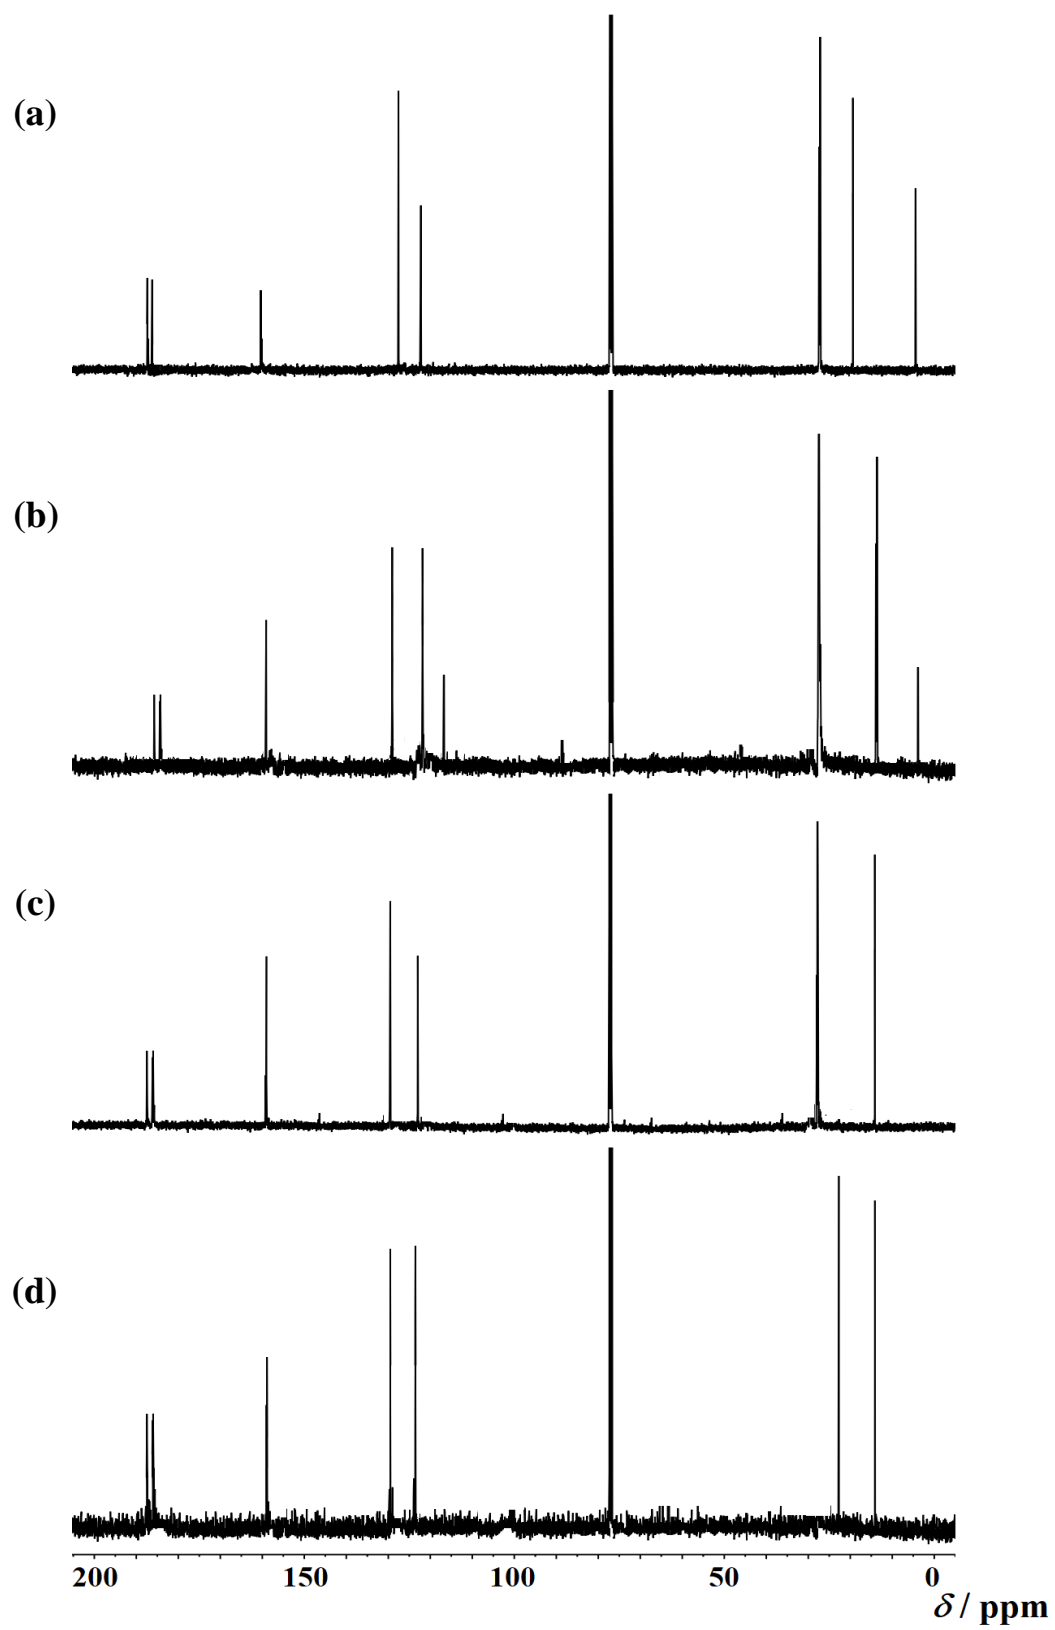

**Fig. S7**  $^{13}\text{C}\{^1\text{H}\}$  NMR of (a) **1**, (b) **2**, (c) **3** and (d) **4** in  $\text{CDCl}_3$ .



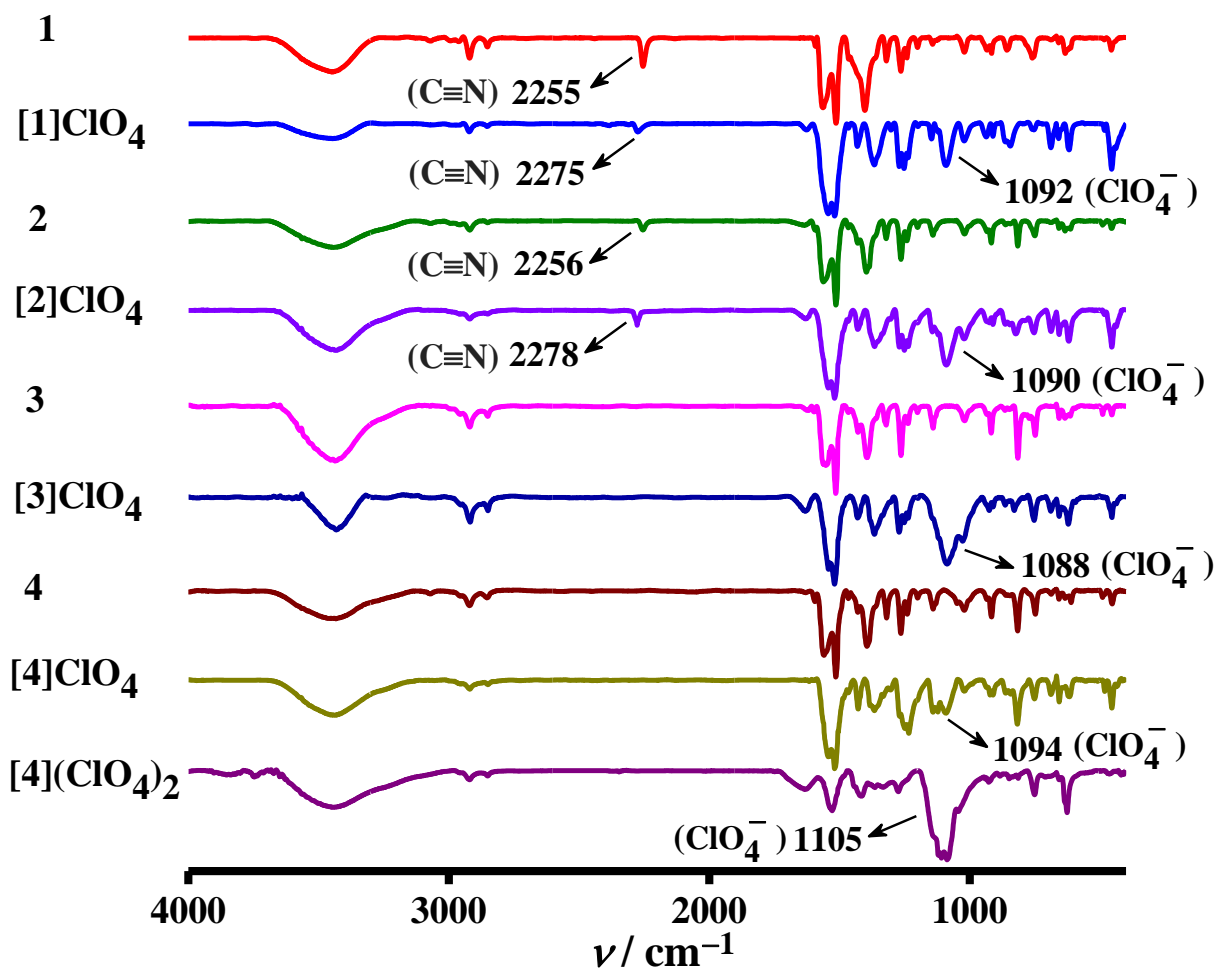

Fig. S8 FT-IR spectra as KBr pellets.

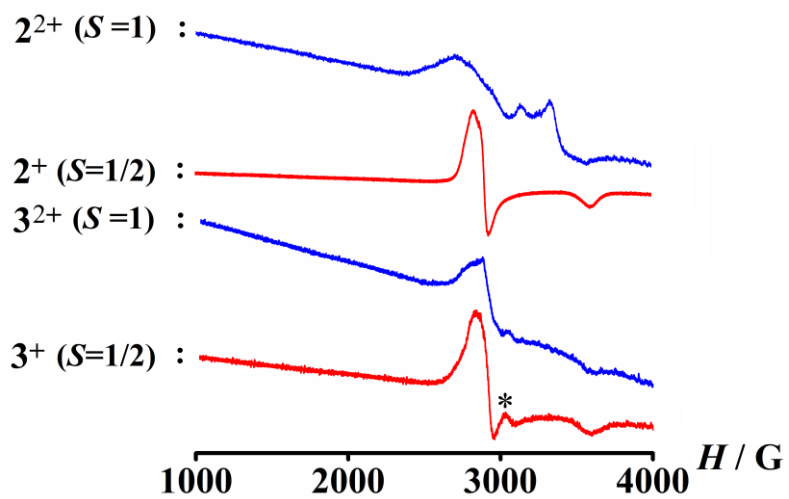

**Fig. S9** EPR spectra of isolated  $2^+$ ,  $3^+$  and electrochemically generated  $2^{2+}$  and  $3^{2+}$  in  $\text{CH}_3\text{CN}$  at 100 K (\*= instrumental or signal from partial dissociation).

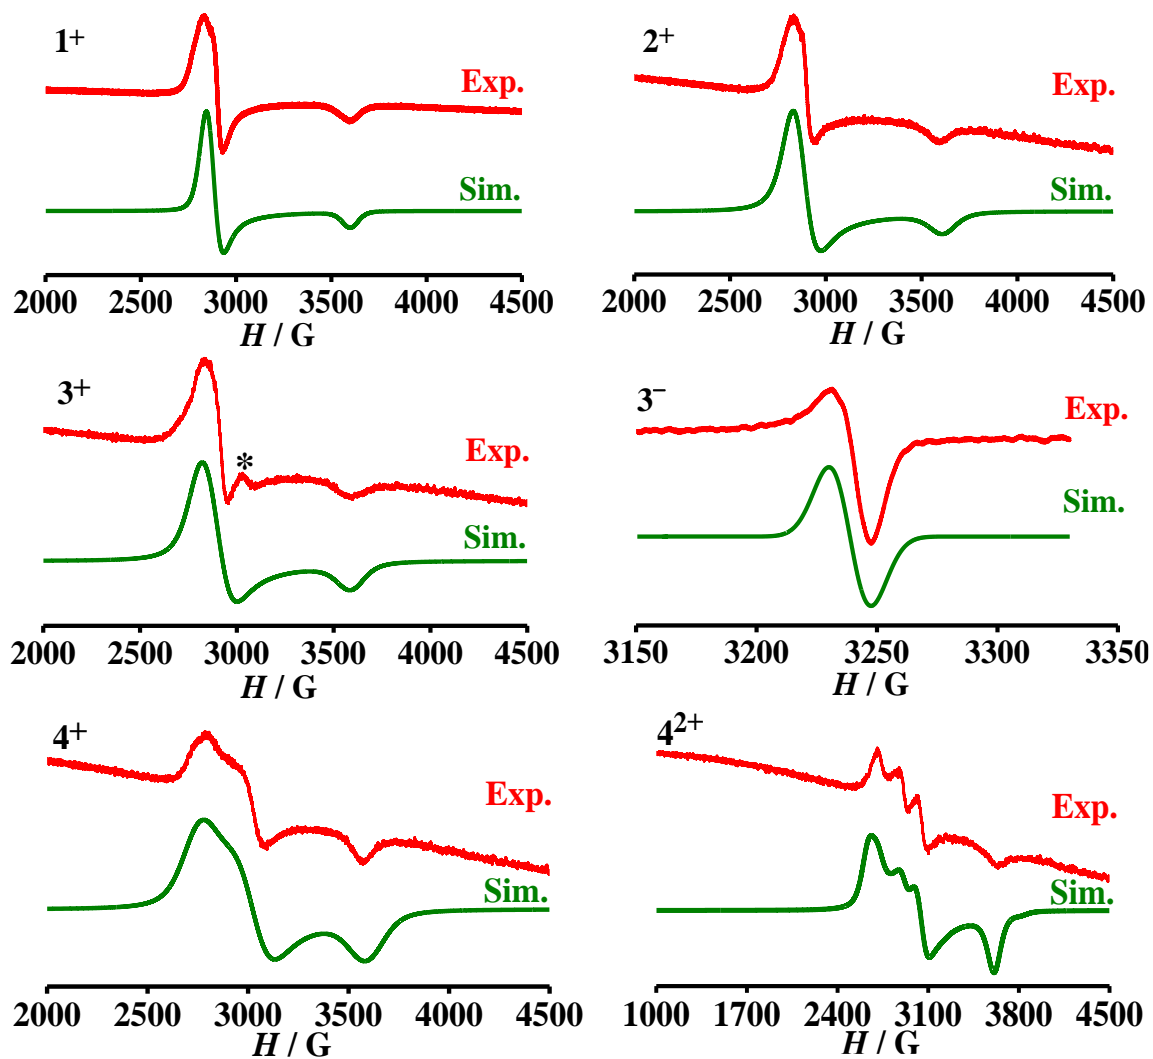

**Fig. S10** Experimental and simulated EPR spectra of representative complexes (\*= instrumental or signal from partial dissociation).

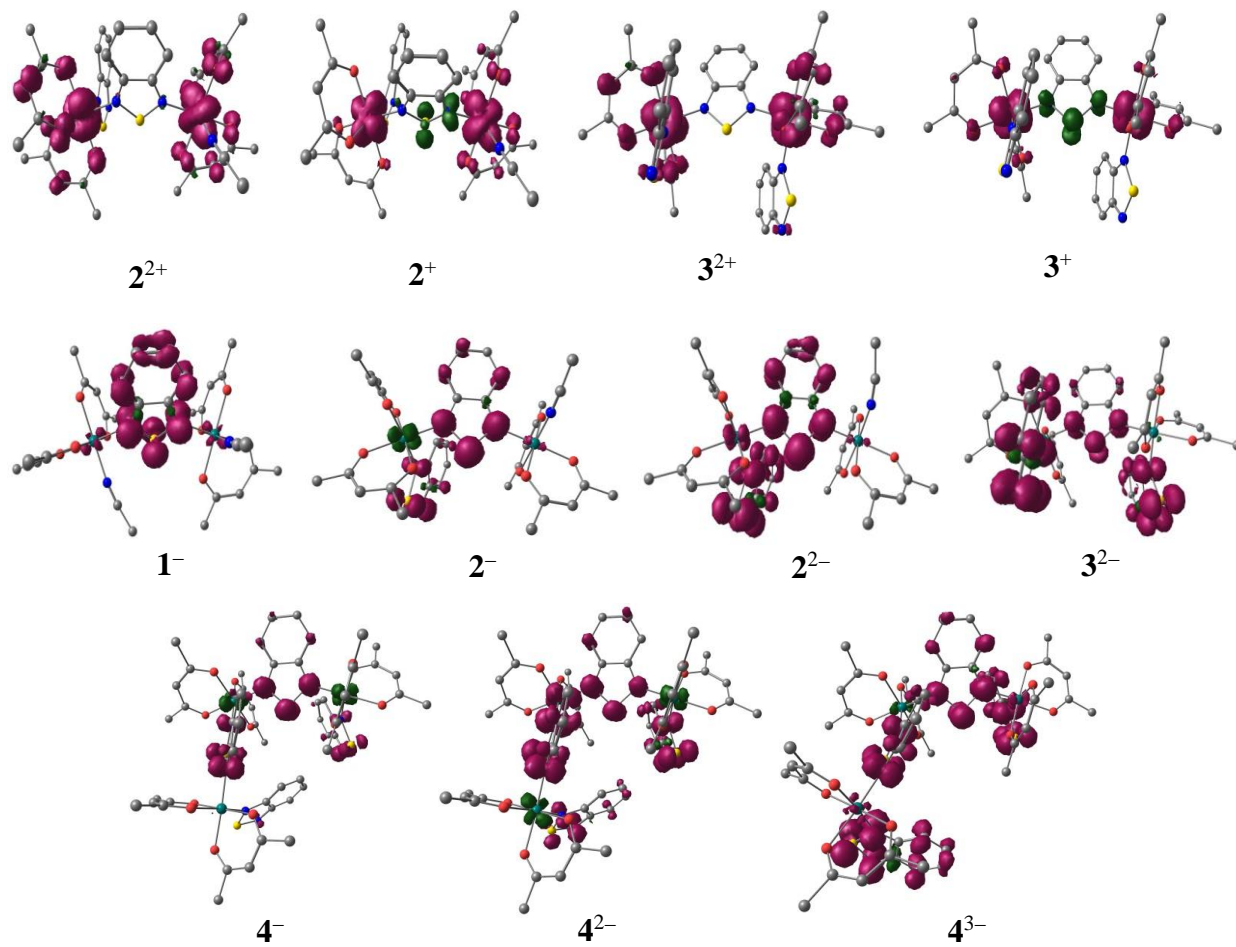

**Fig. S11** DFT calculated Mulliken spin density plots for the cationic and anionic states.

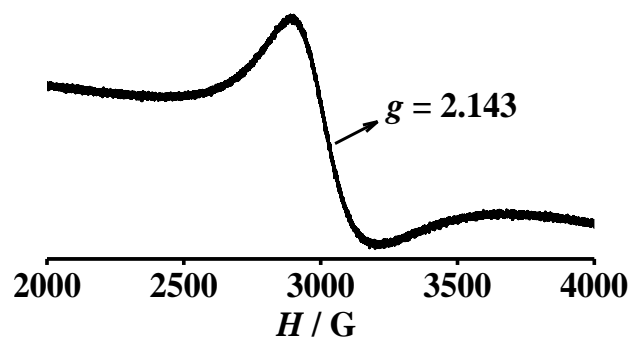

**Fig. S12** Solid state EPR spectrum of [1]ClO<sub>4</sub> at 100 K.

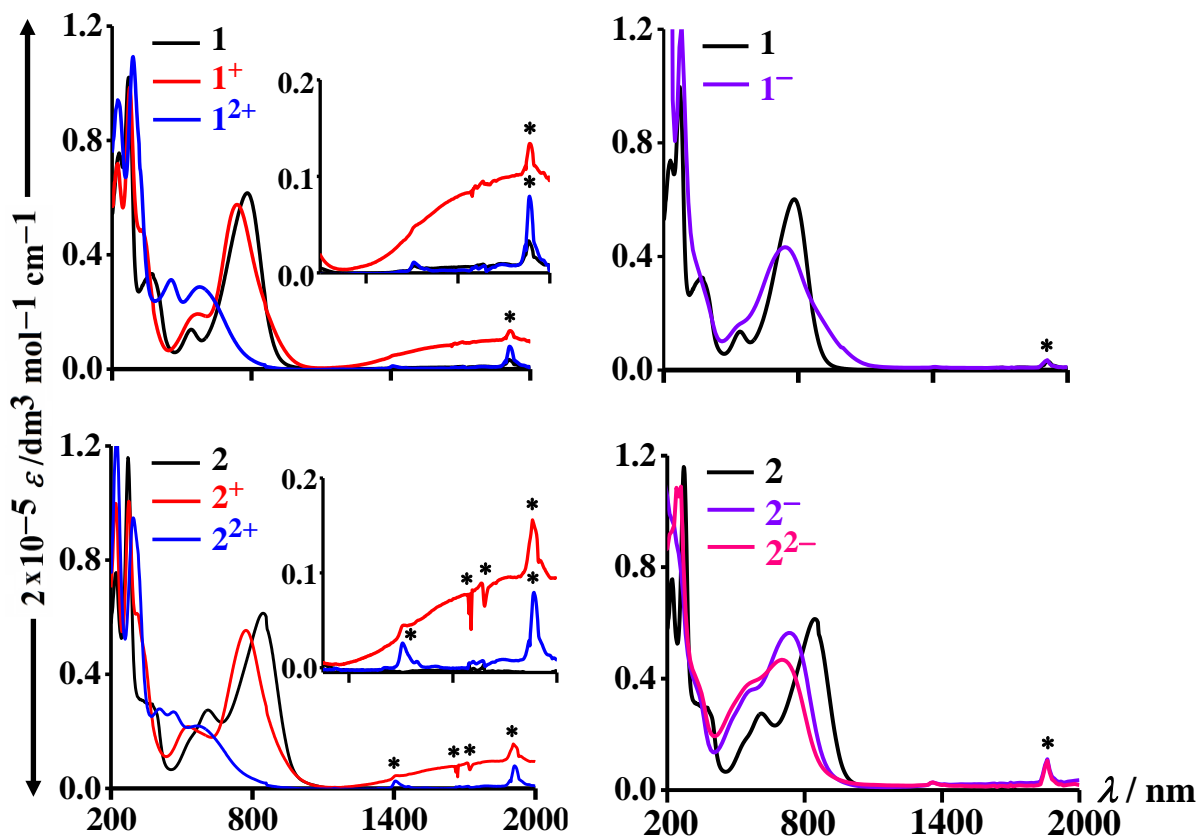

**Fig. S13** UV-vis-NIR spectra of isolated **1-2** and electrochemically generated  $\mathbf{1}^n$  ( $n = +2, +1, -1$ ) and  $\mathbf{2}^m$  ( $m = +2, +1, -1, -2$ ) in  $\text{CH}_3\text{CN}$  (\*: Instrumental).

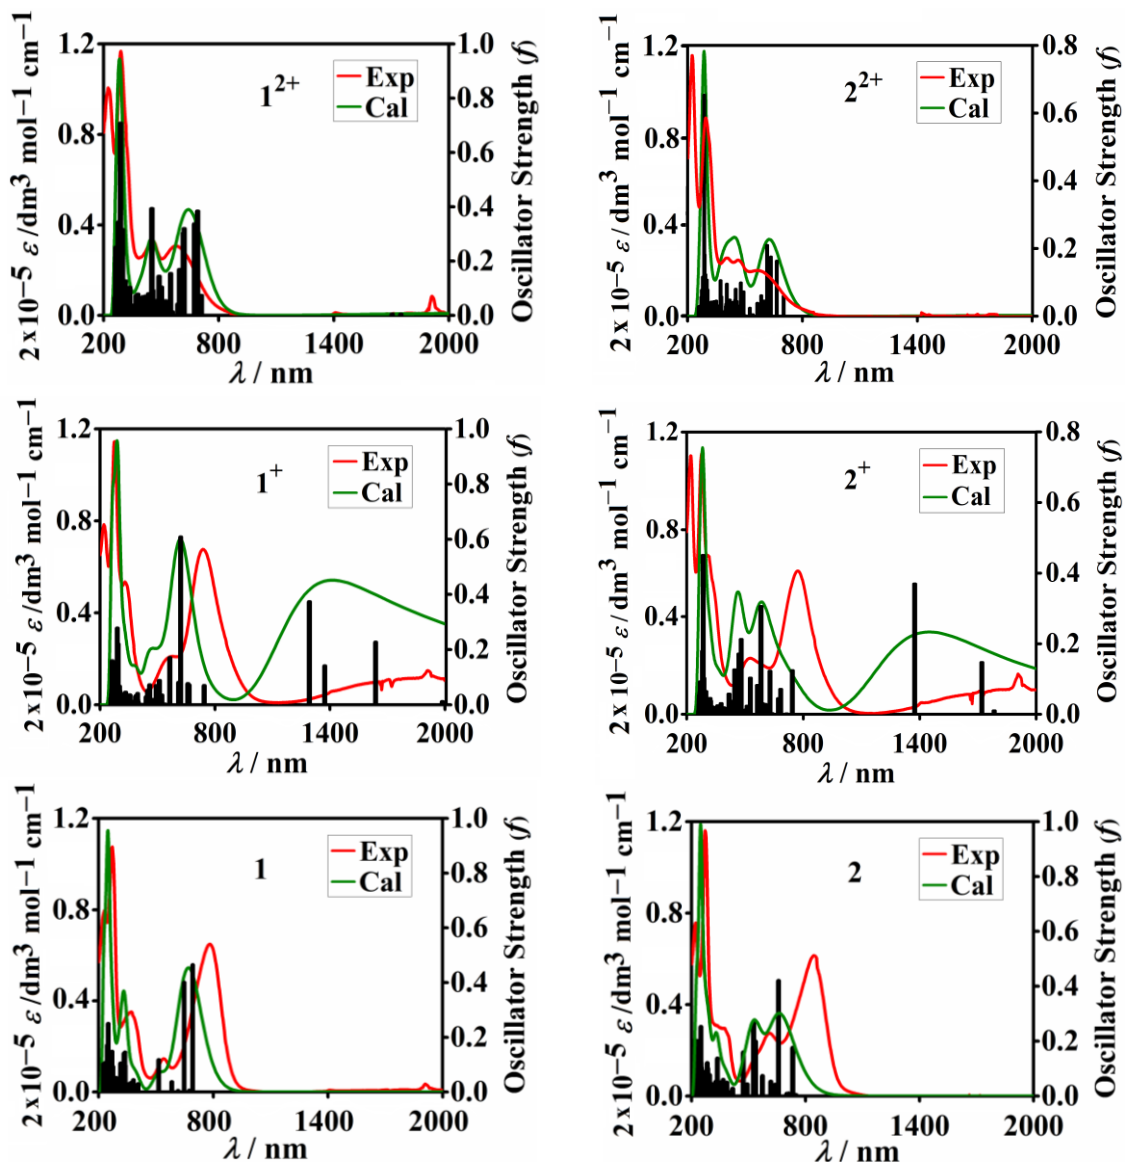

**Fig. S14A** Experimental and TD-DFT (B3LYP/CPCM/CH<sub>3</sub>CN) calculated electronic spectra in CH<sub>3</sub>CN. Oscillator strengths are shown by the black vertical lines; the spectra (green) are convoluted with a Gaussian function having fullwidth at half-maximum of 3000 cm<sup>-1</sup>.

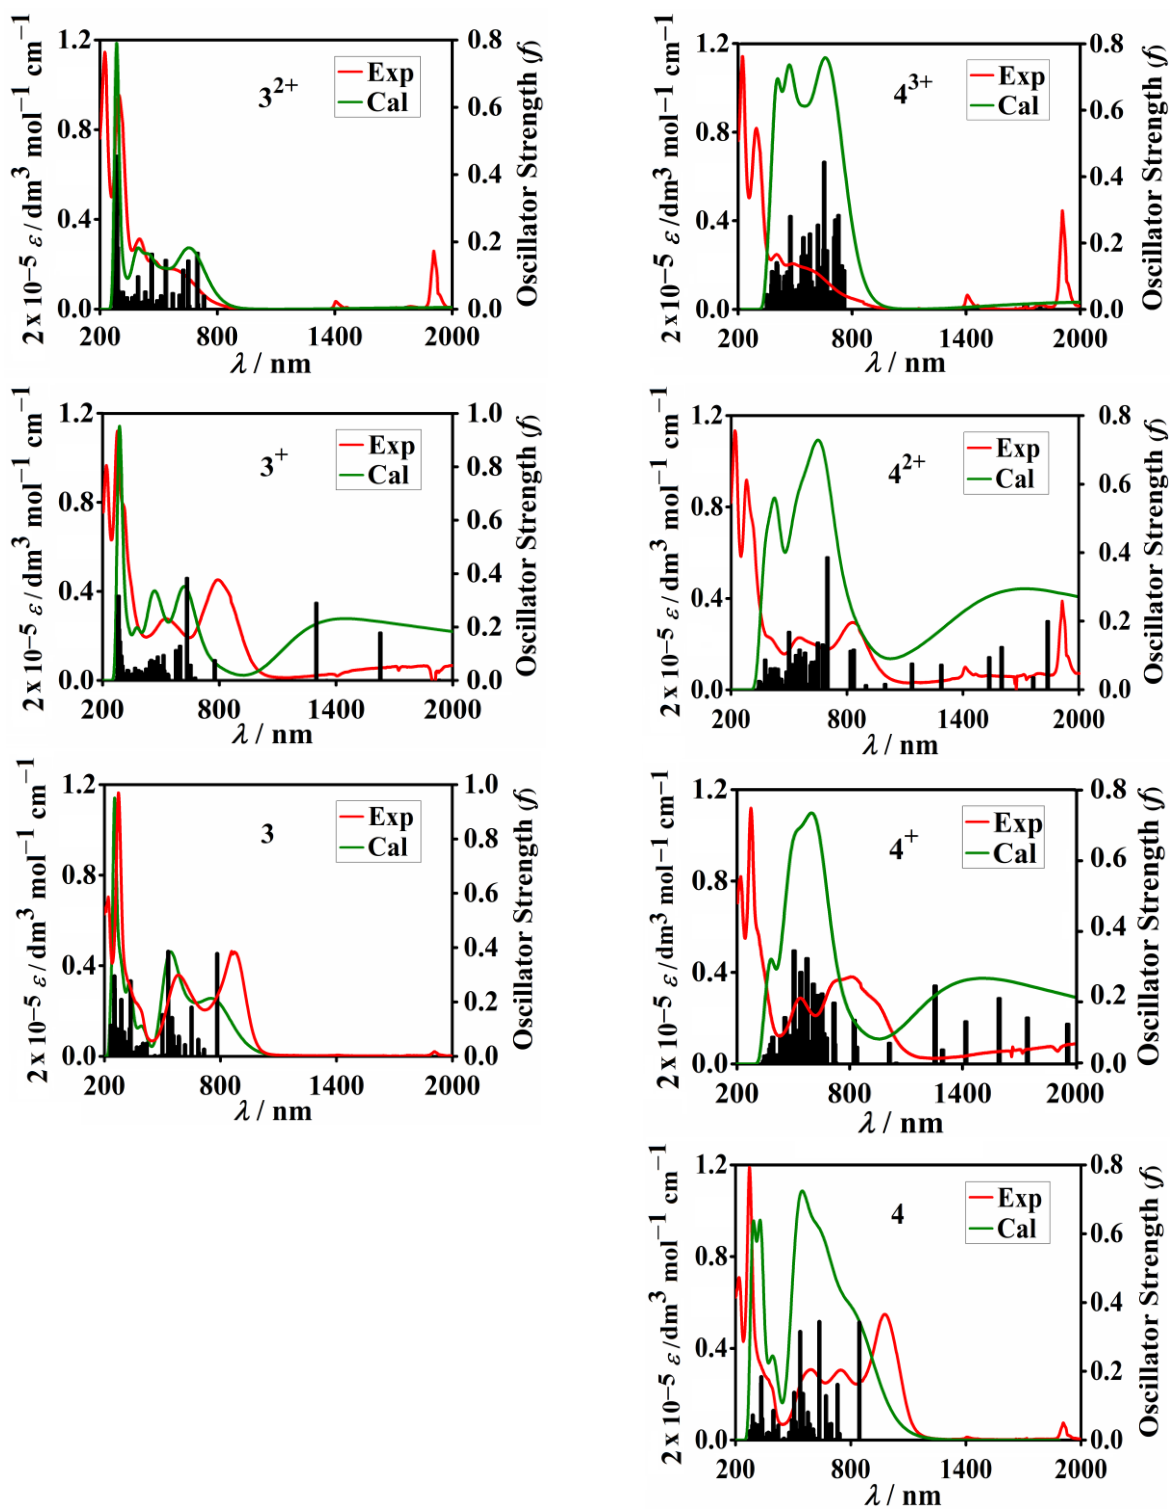

**Fig. S14B** Experimental and TD-DFT (B3LYP/CPCM/CH<sub>3</sub>CN) calculated electronic spectra in CH<sub>3</sub>CN. Oscillator strengths are shown by the black vertical lines; the spectra (green) are convoluted with a Gaussian function having fullwidth at half-maximum of 3000 cm<sup>-1</sup>.



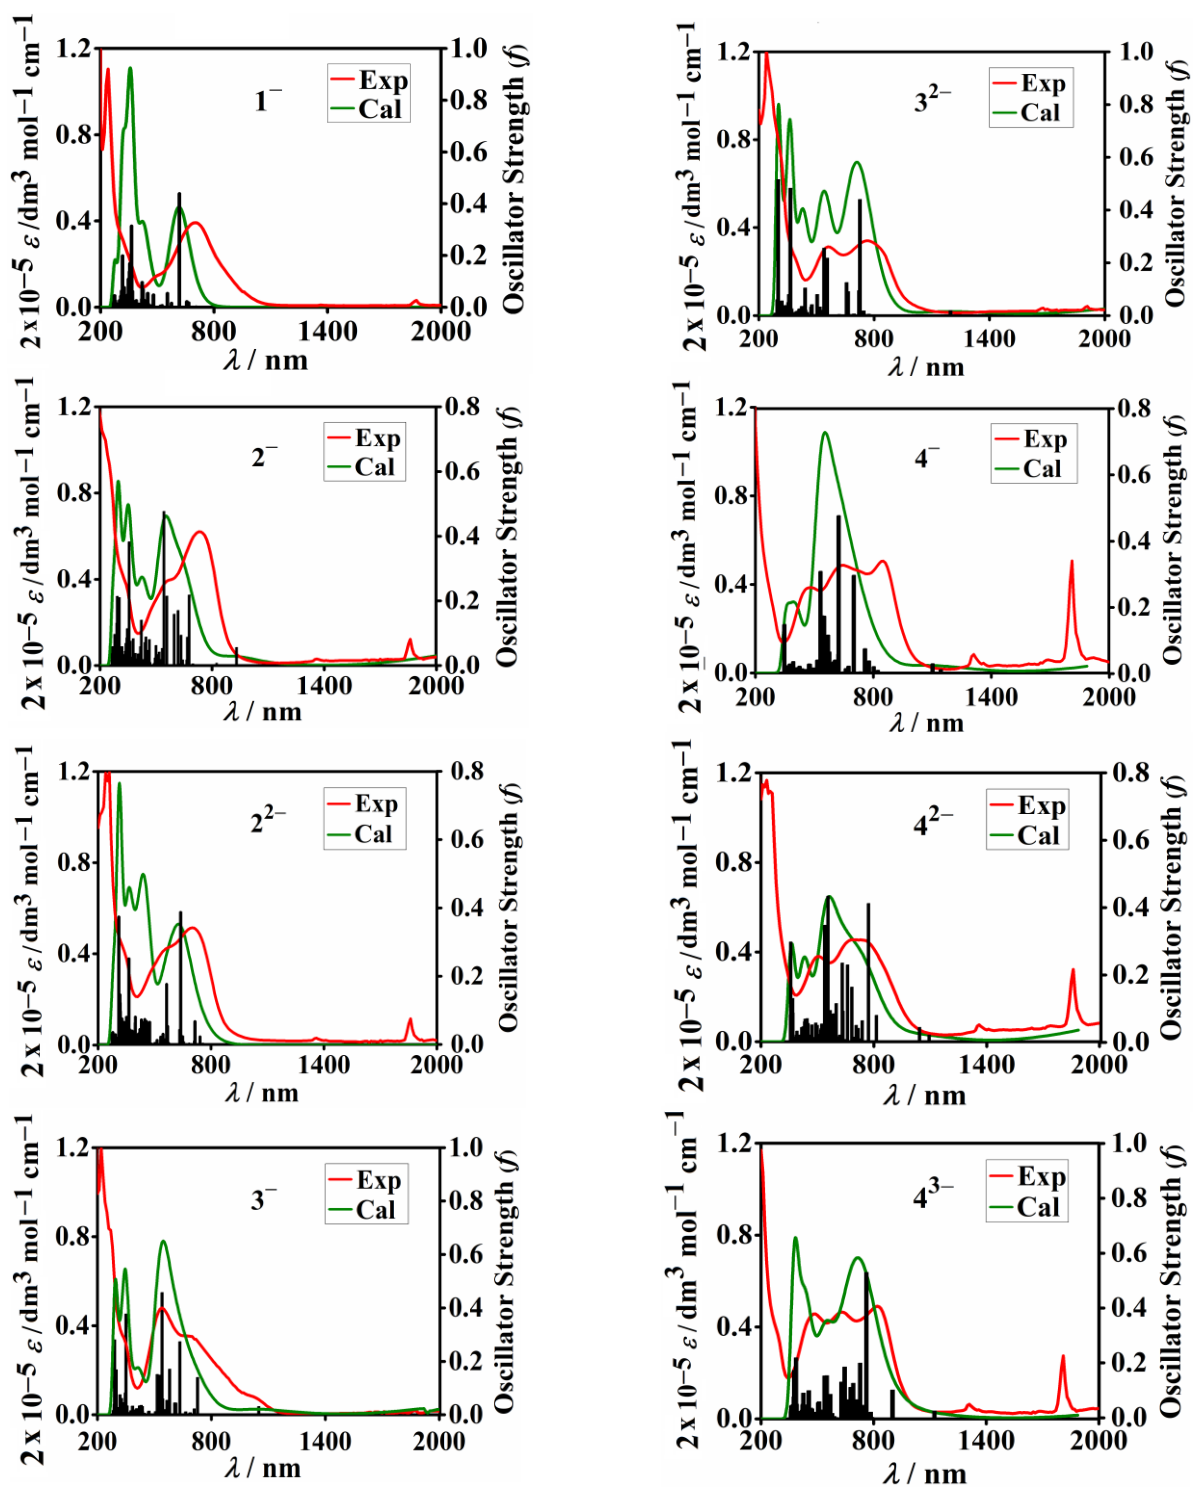

**Fig. S14C** Experimental and TD-DFT (B3LYP/CPCM/CH<sub>3</sub>CN) calculated electronic spectra in CH<sub>3</sub>CN. Oscillator strengths are shown by the black vertical lines; the spectra (green) are convoluted with a Gaussian function having fullwidth at half-maximum of 3000 cm<sup>-1</sup>.

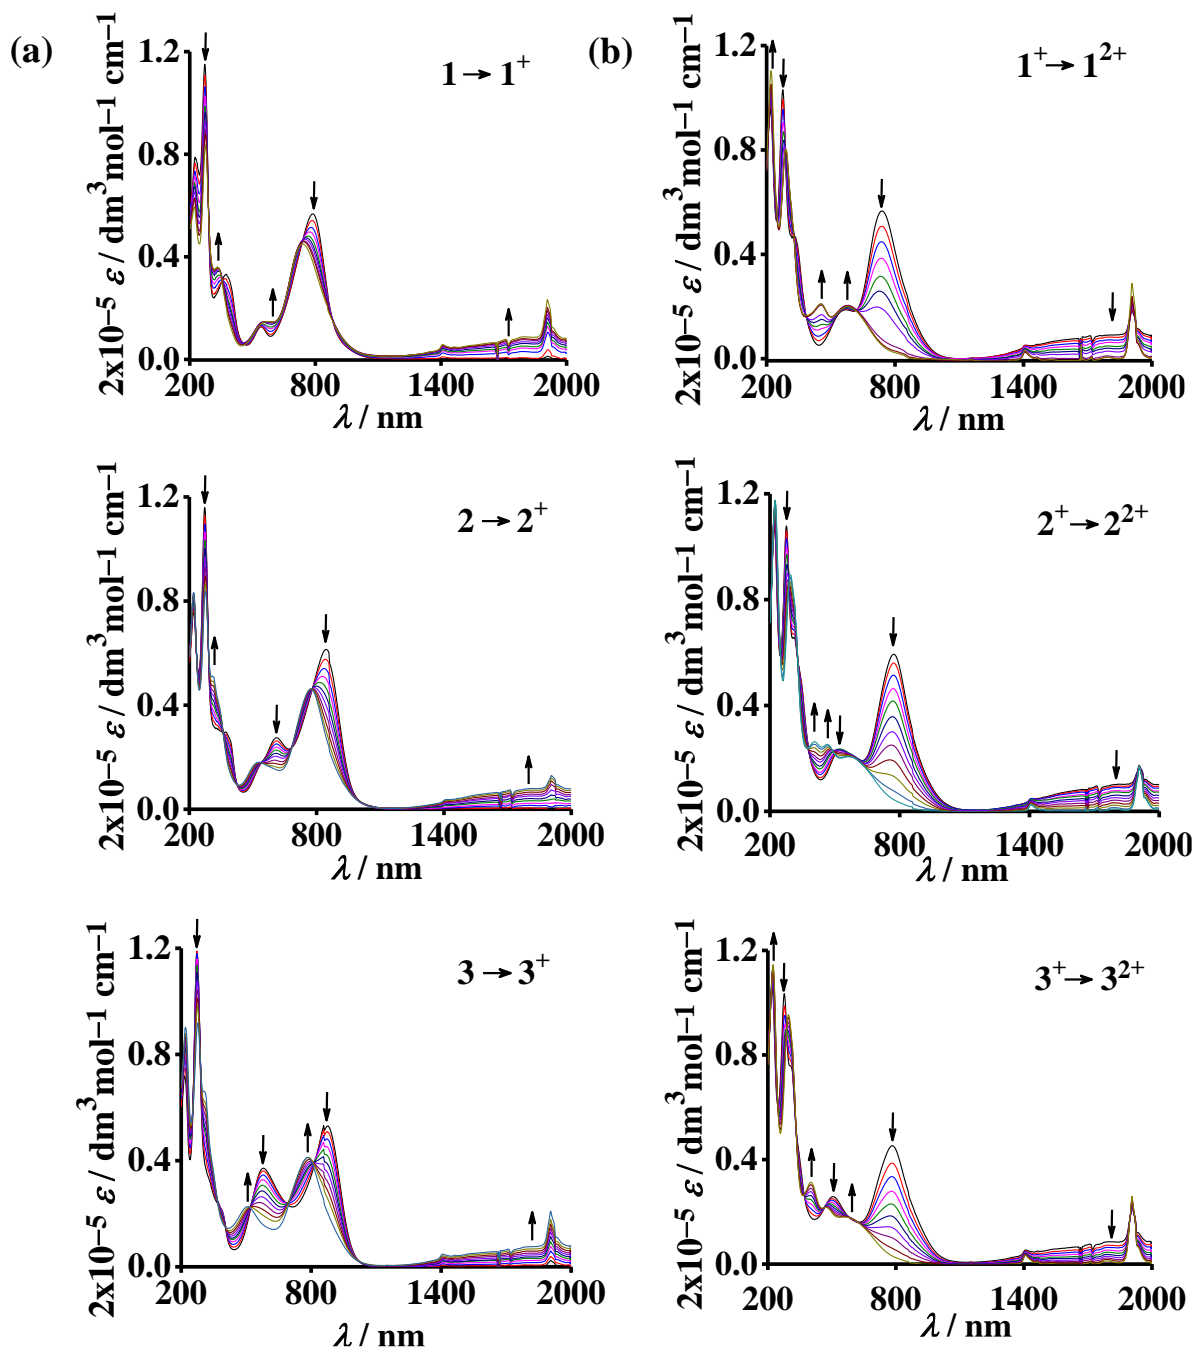

**Fig. S15A** UV-vis-NIR spectral changes of (a)  $1-3 \rightarrow 1^+-3^+$  and (b)  $1^+-3^+ \rightarrow 1^{2+}-3^{2+}$  by 1:1 and 1:2  $(\text{NH}_4)_2[\text{Ce}(\text{NO}_3)_6]$ , respectively, in  $\text{CH}_3\text{CN}$ .

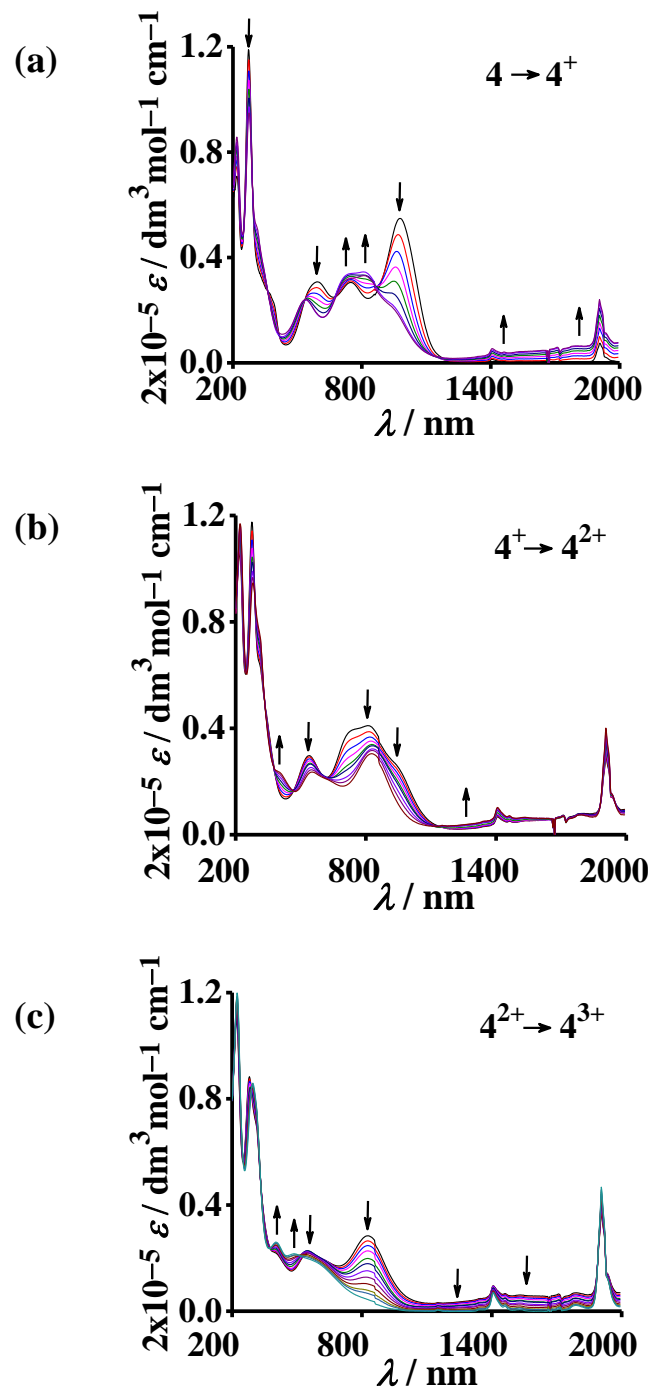

**Fig. S15B** UV-vis-NIR spectral changes of (a)  $4 \rightarrow 4^+$ , (b)  $4^+ \rightarrow 4^{2+}$  and (c)  $4^{2+} \rightarrow 4^{3+}$  by 1:1, 1:2 and 1:3  $(\text{NH}_4)_2[\text{Ce}(\text{NO}_3)_6]$ , respectively, in  $\text{CH}_3\text{CN}$ .

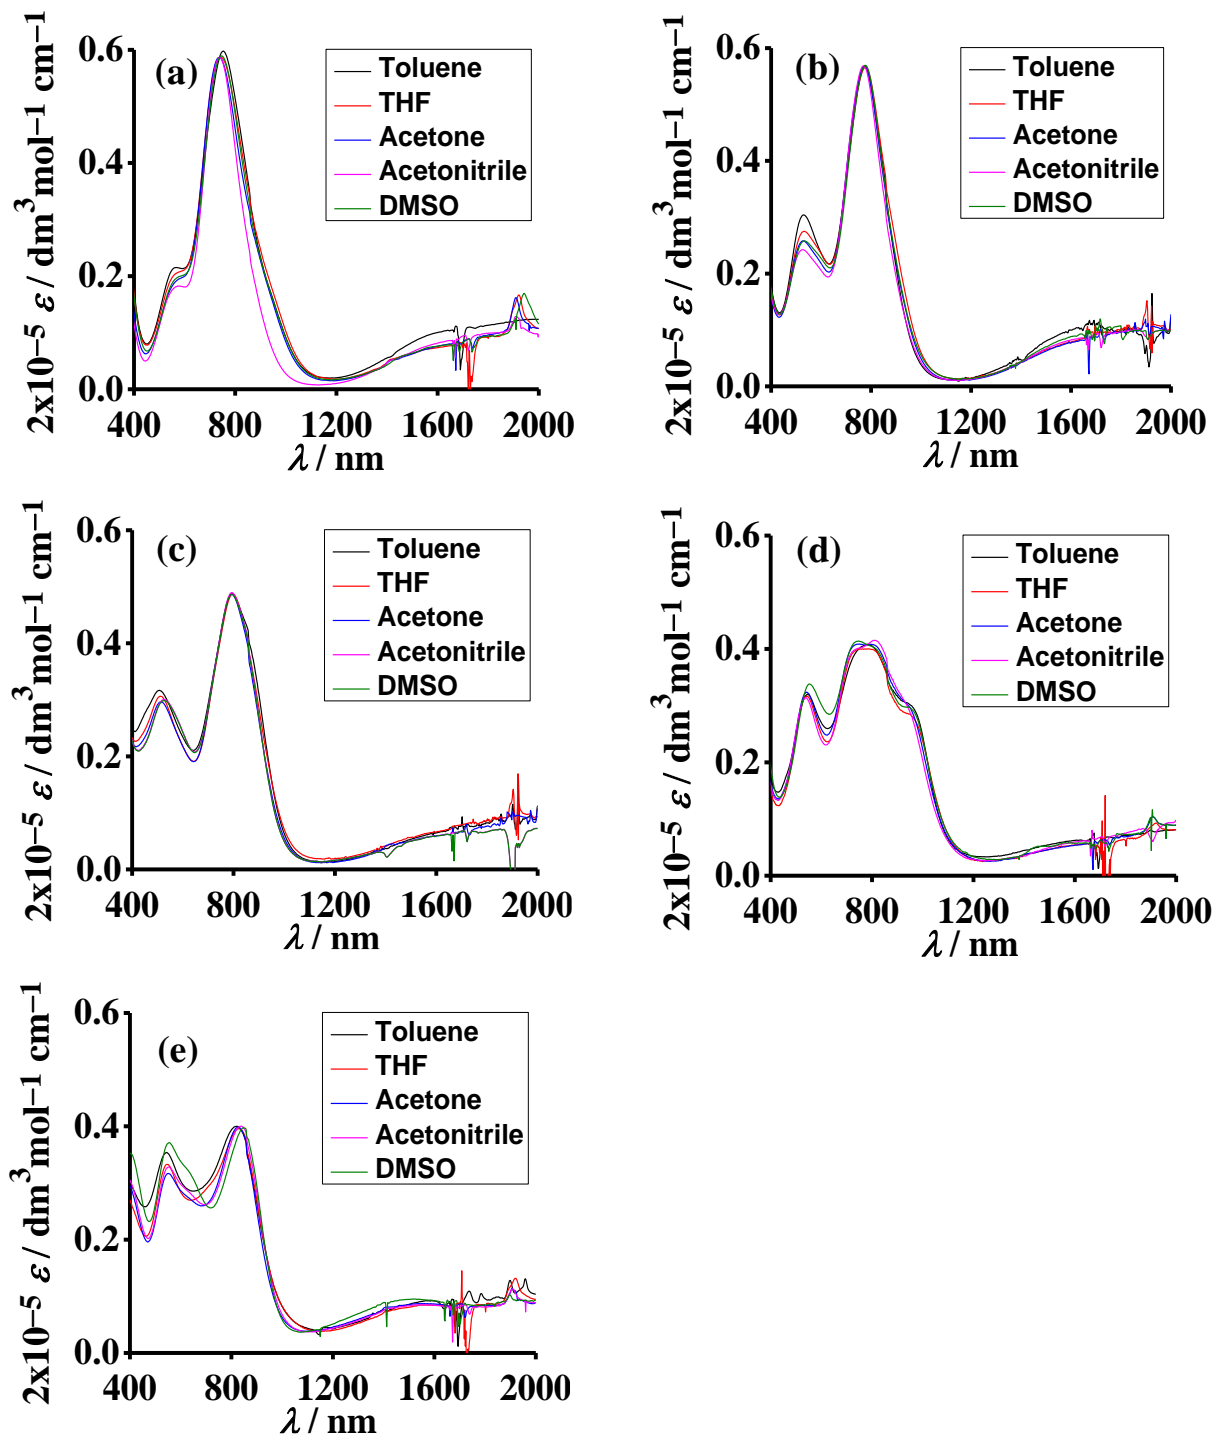

**Fig. S16** UV-vis-NIR spectra of isolated (a) [1](ClO<sub>4</sub>), (b) [2](ClO<sub>4</sub>), (c) [3](ClO<sub>4</sub>), (d) [4](ClO<sub>4</sub>) and (e) [4](ClO<sub>4</sub>)<sub>2</sub> in different solvents.

**Table S1** Selected crystallographic parameters

| Complex                                         | [1]ClO <sub>4</sub> ·2H <sub>2</sub> O                                             | [3]ClO <sub>4</sub> ·1.5CH <sub>2</sub> Cl <sub>2</sub>                                                                    |
|-------------------------------------------------|------------------------------------------------------------------------------------|----------------------------------------------------------------------------------------------------------------------------|
| empirical formula                               | C <sub>30</sub> H <sub>42</sub> ClN <sub>4</sub> O <sub>14</sub> Ru <sub>2</sub> S | C <sub>39.05</sub> H <sub>42.55</sub> Cl <sub>14.01</sub> N <sub>6</sub> O <sub>11.89</sub> Ru <sub>2</sub> S <sub>3</sub> |
| formula weight                                  | 952.335                                                                            | 1226.44                                                                                                                    |
| crystal system                                  | Triclinic                                                                          | Triclinic                                                                                                                  |
| space group                                     | <i>P</i> $\bar{1}$                                                                 | <i>P</i> $\bar{1}$                                                                                                         |
| <i>a</i> (Å)                                    | 12.479(4)                                                                          | 14.9761(4)                                                                                                                 |
| <i>b</i> (Å)                                    | 12.682(4)                                                                          | 19.0200(5)                                                                                                                 |
| <i>c</i> (Å)                                    | 12.995(3)                                                                          | 19.8607(3)                                                                                                                 |
| $\alpha$ (deg)                                  | 94.487(10)                                                                         | 115.273(2)                                                                                                                 |
| $\beta$ (deg)                                   | 104.937(9)                                                                         | 97.684(2)                                                                                                                  |
| $\gamma$ (deg)                                  | 90.671(11)                                                                         | 90.042(2)                                                                                                                  |
| <i>V</i> (Å <sup>3</sup> )                      | 1979.9(10)                                                                         | 5059.2(2)                                                                                                                  |
| <i>Z</i>                                        | 2                                                                                  | 4                                                                                                                          |
| $\mu$ (mm <sup>-1</sup> )                       | 0.949                                                                              | 0.994                                                                                                                      |
| <i>T</i> (K)                                    | 150(2)                                                                             | 100(2)                                                                                                                     |
| <i>D</i> <sub>calcd</sub> (g cm <sup>-3</sup> ) | 1.597                                                                              | 1.610                                                                                                                      |
| F(000)                                          | 962.206                                                                            | 2472                                                                                                                       |
| $\theta$ range(deg)                             | 2.19 to 25.1425                                                                    | 1.655 to 25.000                                                                                                            |
| data/restraints/parameters                      | 7018/ 57/ 507                                                                      | 17822/ 428/ 1292                                                                                                           |
| R1, wR2 [I>2 $\sigma$ (I)]                      | 0.0308, 0.0796                                                                     | 0.0858, 0.2247                                                                                                             |
| R1, wR2(all data)                               | 0.0363, 0.0874                                                                     | 0.1115, 0.2442                                                                                                             |
| GOF                                             | 1.1047                                                                             | 1.051                                                                                                                      |
| largest diff. peak/hole [e Å <sup>-3</sup> ]    | 0.7094/-.03958                                                                     | 1.977/ -1.489                                                                                                              |

**Table S2** Selected experimental and DFT calculated bond lengths (Å)

| Bond      | [1]ClO <sub>4</sub> .2H <sub>2</sub> O |       | [3]ClO <sub>4</sub> .1.5CH <sub>2</sub> Cl <sub>2</sub> |           |                       |       |
|-----------|----------------------------------------|-------|---------------------------------------------------------|-----------|-----------------------|-------|
|           | X-ray                                  | DFT   | X-ray<br>(molecule A)                                   | Bond      | X-ray<br>(molecule B) | DFT   |
| Ru1-N1    | 1.974(3)                               | 2.046 | 1.988(7)                                                | Ru3-N7    | 1.970(7)              | 2.038 |
| Ru2-N2    | 2.002(3)                               | 2.033 | 1.996(7)                                                | Ru4-N8    | 1.987(7)              | 2.038 |
| Ru1-N3    | 2.038(3)                               | 2.071 | 2.047(7)                                                | Ru3-N9    | 2.036(10)             | 2.107 |
| Ru2-N4    | 2.039(3)                               | 2.069 | -                                                       | Ru4-N10   | -                     | -     |
| Ru2-N5    | -                                      | -     | 2.022(9)                                                | Ru4-N11   | 2.051(7)              | 2.108 |
| Ru1-O1    | 2.027(2)                               | 2.040 | 1.998(5)                                                | Ru3-O9    | 1.989(9)              | 2.041 |
| Ru1-O2    | 2.034(2)                               | 2.065 | 2.017(6)                                                | Ru3-O10   | 2.055(9)              | 2.068 |
| Ru1-O3    | 2.018(2)                               | 2.050 | 1.996(6)                                                | Ru3-O11   | 2.023(7)              | 2.051 |
| Ru1-O4    | 2.007(2)                               | 2.035 | 2.002(6)                                                | Ru3-O12   | 1.953(10)             | 2.047 |
| Ru2-O5    | 2.015(2)                               | 2.046 | 2.019(6)                                                | Ru4-O13   | 1.997(6)              | 2.041 |
| Ru2-O6    | 2.014(2)                               | 2.068 | 2.049(7)                                                | Ru4-O14   | 2.012(6)              | 2.068 |
| Ru2-O7    | 2.007(2)                               | 2.057 | 2.003(7)                                                | Ru4-O15   | 2.010(6)              | 2.052 |
| Ru2-O8    | 2.007(2)                               | 2.034 | 2.015(7)                                                | Ru4-O16   | 2.009(5)              | 2.049 |
| S1-N1     | 1.662(3)                               | 1.679 | 1.657(7)                                                | S4-N7     | 1.668(7)              | 1.681 |
| S1-N2     | 1.665(3)                               | 1.677 | 1.662(7)                                                | S4-N8     | 1.650(6)              | 1.681 |
| S2-N3     | -                                      | -     | 1.644(7)                                                | S5-N9     | 1.686(10)             | 1.677 |
| S2-N4     | -                                      | -     | 1.618(9)                                                | S5-N10    | 1.600(13)             | 1.626 |
| S3-N5     | -                                      | -     | 1.615(9)                                                | S6-N11    | 1.639(7)              | 1.677 |
| S3-N6     | -                                      | -     | 1.625(11)                                               | S6-N12    | 1.590(8)              | 1.626 |
| Ru1---Ru2 | 6.227                                  | 6.361 | 6.256                                                   | Ru3---Ru4 | 6.184                 | 6.378 |

**Table S3** Selected experimental and DFT calculated bond angles (deg)

| Bond angles | [1]ClO <sub>4</sub> .2H <sub>2</sub> O |        | [3]ClO <sub>4</sub> .1.5CH <sub>2</sub> Cl <sub>2</sub> |             |                       |        |
|-------------|----------------------------------------|--------|---------------------------------------------------------|-------------|-----------------------|--------|
|             | Xray                                   | DFT    | X-ray<br>(molecule A)                                   | Bond angles | X-ray<br>(molecule B) | DFT    |
| N1-Ru1-N3   | 90.62(11)                              | 91.95  | 92.3(3)                                                 | N7-Ru3-N9   | 91.8(3)               | 92.20  |
| N1-Ru1-O1   | 174.49(10)                             | 178.11 | 175.2(3)                                                | N7-Ru3-O9   | 178.8(4)              | 177.71 |
| N1-Ru1-O2   | 91.14(9)                               | 91.23  | 92.6(2)                                                 | N7-Ru3-O10  | 88.2(3)               | 91.54  |
| N1-Ru1-O3   | 88.70(9)                               | 89.99  | 90.2(3)                                                 | N7-Ru3-O11  | 91.7(3)               | 90.18  |
| N1-Ru1-O4   | 88.93(9)                               | 90.85  | 91.2(3)                                                 | N7-Ru3-O12  | 88.0(3)               | 91.02  |
| N3-Ru1-O1   | 93.53(11)                              | 89.23  | 90.6(3)                                                 | N9-Ru3-O9   | 86.9(4)               | 88.36  |
| N3-Ru1-O2   | 89.34(10)                              | 91.33  | 90.0(3)                                                 | N9-Ru3-O10  | 89.8(4)               | 93.09  |
| N3-Ru1-O3   | 89.31(10)                              | 88.33  | 86.3(3)                                                 | N9-Ru3-O11  | 85.9(3)               | 86.41  |
| N3-Ru1-O4   | 176.72(10)                             | 176.98 | 176.0(2)                                                | N9-Ru3-O12  | 178.2(4)              | 176.75 |
| O1-Ru1-O2   | 92.52(9)                               | 90.23  | 91.2(2)                                                 | O9-Ru3-O10  | 91.8(3)               | 90.65  |
| O1-Ru1-O3   | 87.74(9)                               | 88.56  | 86.2(2)                                                 | O9-Ru3-O11  | 88.2(3)               | 87.64  |
| O1-Ru1-O4   | 87.13(9)                               | 88.01  | 86.0(2)                                                 | O9-Ru3-O12  | 93.2(4)               | 88.41  |
| O2-Ru1-O3   | 178.64(9)                              | 178.74 | 175.5(2)                                                | O10-Ru3-O11 | 175.7(3)              | 178.23 |
| O2-Ru1-O4   | 87.42(9)                               | 87.45  | 87.9(3)                                                 | O10-Ru3-O12 | 92.0(3)               | 87.26  |
| O3-Ru1-O4   | 93.92(9)                               | 92.84  | 95.5(3)                                                 | O11-Ru3-O12 | 92.3(3)               | 93.14  |
| N2-Ru2-N4   | 90.59(11)                              | 92.88  | -                                                       | -           | -                     | -      |
| N2-Ru2-N5   | -                                      | -      | 92.2(3)                                                 | N8-Ru4-N11  | 95.6(3)               | 92.23  |
| N2-Ru2-O5   | 177.21(10)                             | 178.51 | 177.8(3)                                                | N8-Ru4-O13  | 176.1(3)              | 177.64 |
| N2-Ru2-O6   | 88.36(10)                              | 88.28  | 90.3(3)                                                 | N8-Ru4-O14  | 90.1(3)               | 91.62  |
| N2-Ru2-O7   | 91.96(10)                              | 92.80  | 89.3(3)                                                 | N8-Ru4-O15  | 88.6(3)               | 90.11  |
| N2-Ru2-O8   | 89.47(10)                              | 89.54  | 91.9(3)                                                 | N8-Ru4-O16  | 88.4(3)               | 90.80  |
| N4-Ru2-O5   | 92.10(11)                              | 88.54  | -                                                       | -           | -                     | -      |
| N5-Ru2-O5   | -                                      | -      | 86.8(3)                                                 | N11-Ru4-O13 | 87.5(3)               | 88.49  |
| N4-Ru2-O6   | 91.10(10)                              | 91.97  | -                                                       | -           | -                     | -      |
| N5-Ru2-O6   | -                                      | -      | 93.2(3)                                                 | N11-Ru4-O14 | 91.0(3)               | 93.04  |
| N4-Ru2-O7   | 88.54(11)                              | 88.82  | -                                                       | -           | -                     | -      |
| N5-Ru2-O7   | -                                      | -      | 86.4(3)                                                 | N11-Ru4-O15 | 86.8(2)               | 86.31  |
| N4-Ru2-O8   | 177.10(10)                             | 176.95 | -                                                       | -           | -                     | -      |
| N5-Ru2-O8   | -                                      | -      | 175.9(3)                                                | N11-Ru4-O16 | 176.0(3)              | 176.92 |
| O5-Ru2-O6   | 92.31(10)                              | 91.22  | 91.7(3)                                                 | O13-Ru4-O14 | 92.3(3)               | 90.59  |
| O5-Ru2-O7   | 87.39(10)                              | 87.68  | 88.6(3)                                                 | O13-Ru4-O15 | 89.2(2)               | 87.69  |
| O5-Ru2-O8   | 87.87(10)                              | 89.03  | 89.1(3)                                                 | O13-Ru4-O16 | 88.5(2)               | 88.46  |
| O6-Ru2-O7   | 179.52(10)                             | 178.63 | 179.4(3)                                                | O14-Ru4-O15 | 177.4(2)              | 178.17 |
| O6-Ru2-O8   | 86.00(9)                               | 86.24  | 86.6(3)                                                 | O14-Ru4-O16 | 88.3(2)               | 87.42  |
| O7-Ru2-O8   | 94.36(10)                              | 92.92  | 93.9(3)                                                 | O15-Ru4-O16 | 93.9(2)               | 93.14  |

**Table S4** DFT calculated selected MO compositions ((U/R)B3LYP/LanL2DZ/6-31G\*\*)

| Complex                                               | Energy (eV) | MO            | % Contribution of Ru/acac/BTD |
|-------------------------------------------------------|-------------|---------------|-------------------------------|
| <b>1<sup>2+</sup> (S=1)</b>                           |             |               |                               |
| $\Delta E_{((S=0)-(S=1))} = 5911 \text{ cm}^{-1}$     | -9.122      | $\beta$ -LUMO | 42/27/29                      |
| <b>1<sup>+</sup> (S=1/2)</b>                          | -7.610      | SOMO          | 45/44/9                       |
|                                                       | -5.645      | $\beta$ -LUMO | 67/21/10                      |
| <b>1 (S=0)</b>                                        | -3.418      | HOMO          | 53/15/30                      |
|                                                       | -1.652      | LUMO          | 8/4/87                        |
| <b>1<sup>-</sup> (S=1/2)</b>                          | 0.479       | SOMO          | 5/23/71                       |
| <b>2<sup>2+</sup> (S=1)</b>                           |             |               |                               |
| $\Delta E_{((S=0)-(S=1))} = 4526 \text{ cm}^{-1}$     | -9.001      | $\beta$ -LUMO | 53/25/19                      |
| <b>2<sup>+</sup> (S=1/2)</b>                          | -7.696      | SOMO          | 42/53/5                       |
|                                                       | -6.292      | $\beta$ -LUMO | 69/17/12                      |
| <b>2 (S=0)</b>                                        | -4.364      | HOMO          | 66/24/9                       |
|                                                       | -2.243      | LUMO          | 4/1/95                        |
| <b>2<sup>-</sup> (S=1/2)</b>                          | -0.053      | SOMO          | 7/2/90                        |
|                                                       | 1.161       | $\beta$ -LUMO | 4/2/94                        |
| <b>2<sup>2-</sup> (S=1)</b>                           |             |               |                               |
| $\Delta E_{((S=0)-(S=1))} = 3536 \text{ cm}^{-1}$     | 3.099       | SOMO 1        | 6/5/89                        |
| <b>3<sup>2+</sup> (S=1)</b>                           |             |               |                               |
| $\Delta E_{((S=0)-(S=1))} = 5407 \text{ cm}^{-1}$     | -9.214      | $\beta$ -LUMO | 45/22/32                      |
| <b>3<sup>+</sup> (S=1/2)</b>                          | -7.984      | SOMO          | 39/47/14                      |
|                                                       | -6.243      | $\beta$ -LUMO | 64/18/18                      |
| <b>3 (S=0)</b>                                        | -4.588      | HOMO          | 65/21/14                      |
|                                                       | -2.569      | LUMO          | 3/4/93                        |
| <b>3<sup>-</sup> (S=1/2)</b>                          | -0.391      | SOMO          | 6/2/93                        |
|                                                       | 0.623       | $\beta$ -LUMO | 5/2/94                        |
| <b>3<sup>2-</sup> (S=1)</b>                           |             |               |                               |
| $\Delta E_{((S=0)-(S=1))} = 2800 \text{ cm}^{-1}$     | 2.387       | SOMO 1        | 9/3/88                        |
| <b>4<sup>3+</sup> (S=3/2)</b>                         |             |               |                               |
| $\Delta E_{((S=1/2)-(S=3/2))} = 5134 \text{ cm}^{-1}$ | -10.975     | $\beta$ -LUMO | 44/24/31                      |
| <b>4<sup>2+</sup> (S=1)</b>                           | -9.758      | SOMO 1        | 36/51/12                      |
| $\Delta E_{((S=0)-(S=1))} = 5449 \text{ cm}^{-1}$     | -8.386      | $\beta$ -LUMO | 53/19/28                      |
| <b>4<sup>+</sup> (S=1/2)</b>                          | -7.262      | SOMO          | 49/35/16                      |
|                                                       | -5.967      | $\beta$ -LUMO | 66/17/16                      |
| <b>4 (S=0)</b>                                        | -4.452      | HOMO          | 65/20/15                      |
|                                                       | -2.444      | LUMO          | 7/2/91                        |
| <b>4<sup>-</sup> (S=1/2)</b>                          | -0.666      | SOMO          | 7/2/91                        |
|                                                       | 0.096       | $\beta$ -LUMO | 6/2/92                        |
| <b>4<sup>2-</sup> (S=1)</b>                           | 1.748       | SOMO 1        | 10/3/87                       |
| $\Delta E_{((S=0)-(S=1))} = 2522 \text{ cm}^{-1}$     | 2.283       | $\beta$ -LUMO | 6/3/91                        |
| <b>4<sup>3-</sup> (S=3/2)</b>                         |             |               |                               |
| $\Delta E_{((S=1/2)-(S=3/2))} = 1029 \text{ cm}^{-1}$ | 4.231       | SOMO          | 11/3/86                       |



**Table S5A** EPR simulation data of complexes **1<sup>+</sup>**, **2<sup>+</sup>**, **3<sup>+</sup>**, **3<sup>-</sup>** and **4<sup>+</sup>**

| Parameter           | <b>1<sup>+</sup></b>           | <b>2<sup>+</sup></b> | <b>3<sup>+</sup></b>        | <b>4<sup>+</sup></b>                | <b>3<sup>-</sup></b>  |
|---------------------|--------------------------------|----------------------|-----------------------------|-------------------------------------|-----------------------|
| S                   | 1/2                            | 1/2                  | 1/2                         | 1/2                                 | 1/2                   |
| $g_x$               | 2.2682                         | 2.2799               | 2.308                       | 2.3539                              | $g_{iso} =$<br>2.0068 |
| $g_y$               | 2.2682                         | 2.2614               | 2.232                       | 2.1487                              |                       |
| $g_z$               | 1.8052                         | 1.7994               | 1.811                       | 1.8105                              |                       |
| lwpp (peak to peak) | 6.2000<br>1.6500               | 7.9000<br>5.3370     | 8 6.05                      | 12.0621<br>6.0610                   | 1.7479                |
| $A_x$               | $A_x = A_y = A_z =$<br>60.3797 | 74.9998              | $A_x = A_y =$<br>$A_z = 65$ | $A_x = A_y =$<br>$A_z =$<br>60.3912 |                       |
| $A_y$               |                                | 55.0004              |                             |                                     |                       |
| $A_z$               |                                | 89.9993              |                             |                                     |                       |

**Table S5B** EPR simulation data of **4<sup>2+</sup>**

| Parameter           | <b>4<sup>2+</sup></b> |              |                  |
|---------------------|-----------------------|--------------|------------------|
|                     | <b>Ru</b>             | <b>Ru</b>    | <b>Ru</b>        |
| Sys. weight         | 39%                   | 20%          | 40%              |
| S                   | 1                     |              |                  |
| $g_x$               | 2.4606                | 2.3373       | 2.3958           |
| $g_y$               | 2.1332                | 2.0545       | 2.2270           |
| $g_z$               | 1.80                  | 1.7046       | 1.80             |
| lwpp (peak to peak) | 5.98594.0040          | 7.97201.9948 | 5.0113<br>2.9926 |
| A                   | 68.49                 | 69.17        | 62.00            |

All the simulated EPR parameters are in mT unit.

**Table S6** Composition and energies of selected molecular orbitals of  $\mathbf{1}^{2+}$  ( $S=1$ )

| MO             | Energy (eV) | % Composition |      |     |                    |
|----------------|-------------|---------------|------|-----|--------------------|
|                |             | Ru            | acac | BTD | CH <sub>3</sub> CN |
| $\alpha$ -spin |             |               |      |     |                    |
| LUMO+5         | -5.889      | 35            | 47   | 9   | 8                  |
| LUMO+4         | -5.994      | 7             | 88   | 3   | 2                  |
| LUMO+3         | -6.021      | 21            | 72   | 2   | 5                  |
| LUMO+2         | -6.141      | 15            | 56   | 28  | 1                  |
| LUMO+1         | -6.152      | 33            | 44   | 22  | 1                  |
| LUMO           | -8.116      | 8             | 2    | 89  | 0                  |
| SOMO 1         | -10.805     | 31            | 60   | 8   | 1                  |
| SOMO 2         | -10.950     | 17            | 80   | 3   | 1                  |
| HOMO-2         | -11.096     | 27            | 69   | 3   | 1                  |
| HOMO-3         | -11.129     | 22            | 73   | 4   | 1                  |
| HOMO-4         | -11.434     | 34            | 45   | 20  | 1                  |
| HOMO-5         | -11.631     | 68            | 26   | 5   | 2                  |
| $\beta$ -spin  |             |               |      |     |                    |
| LUMO+5         | -5.966      | 5             | 91   | 2   | 1                  |
| LUMO+4         | -6.011      | 19            | 67   | 14  | 1                  |
| LUMO+3         | -6.085      | 7             | 57   | 35  | 1                  |
| LUMO+2         | -7.733      | 26            | 8    | 65  | 1                  |
| LUMO+1         | -8.572      | 65            | 27   | 5   | 3                  |
| LUMO           | -9.122      | 42            | 27   | 29  | 2                  |
| HOMO           | -10.795     | 36            | 58   | 4   | 2                  |
| HOMO-1         | -10.866     | 23            | 72   | 4   | 1                  |
| HOMO-2         | -11.165     | 41            | 46   | 11  | 2                  |
| HOMO-3         | -11.180     | 51            | 44   | 2   | 2                  |
| HOMO-4         | -11.224     | 40            | 56   | 3   | 2                  |
| HOMO-5         | -11.333     | 61            | 32   | 4   | 3                  |

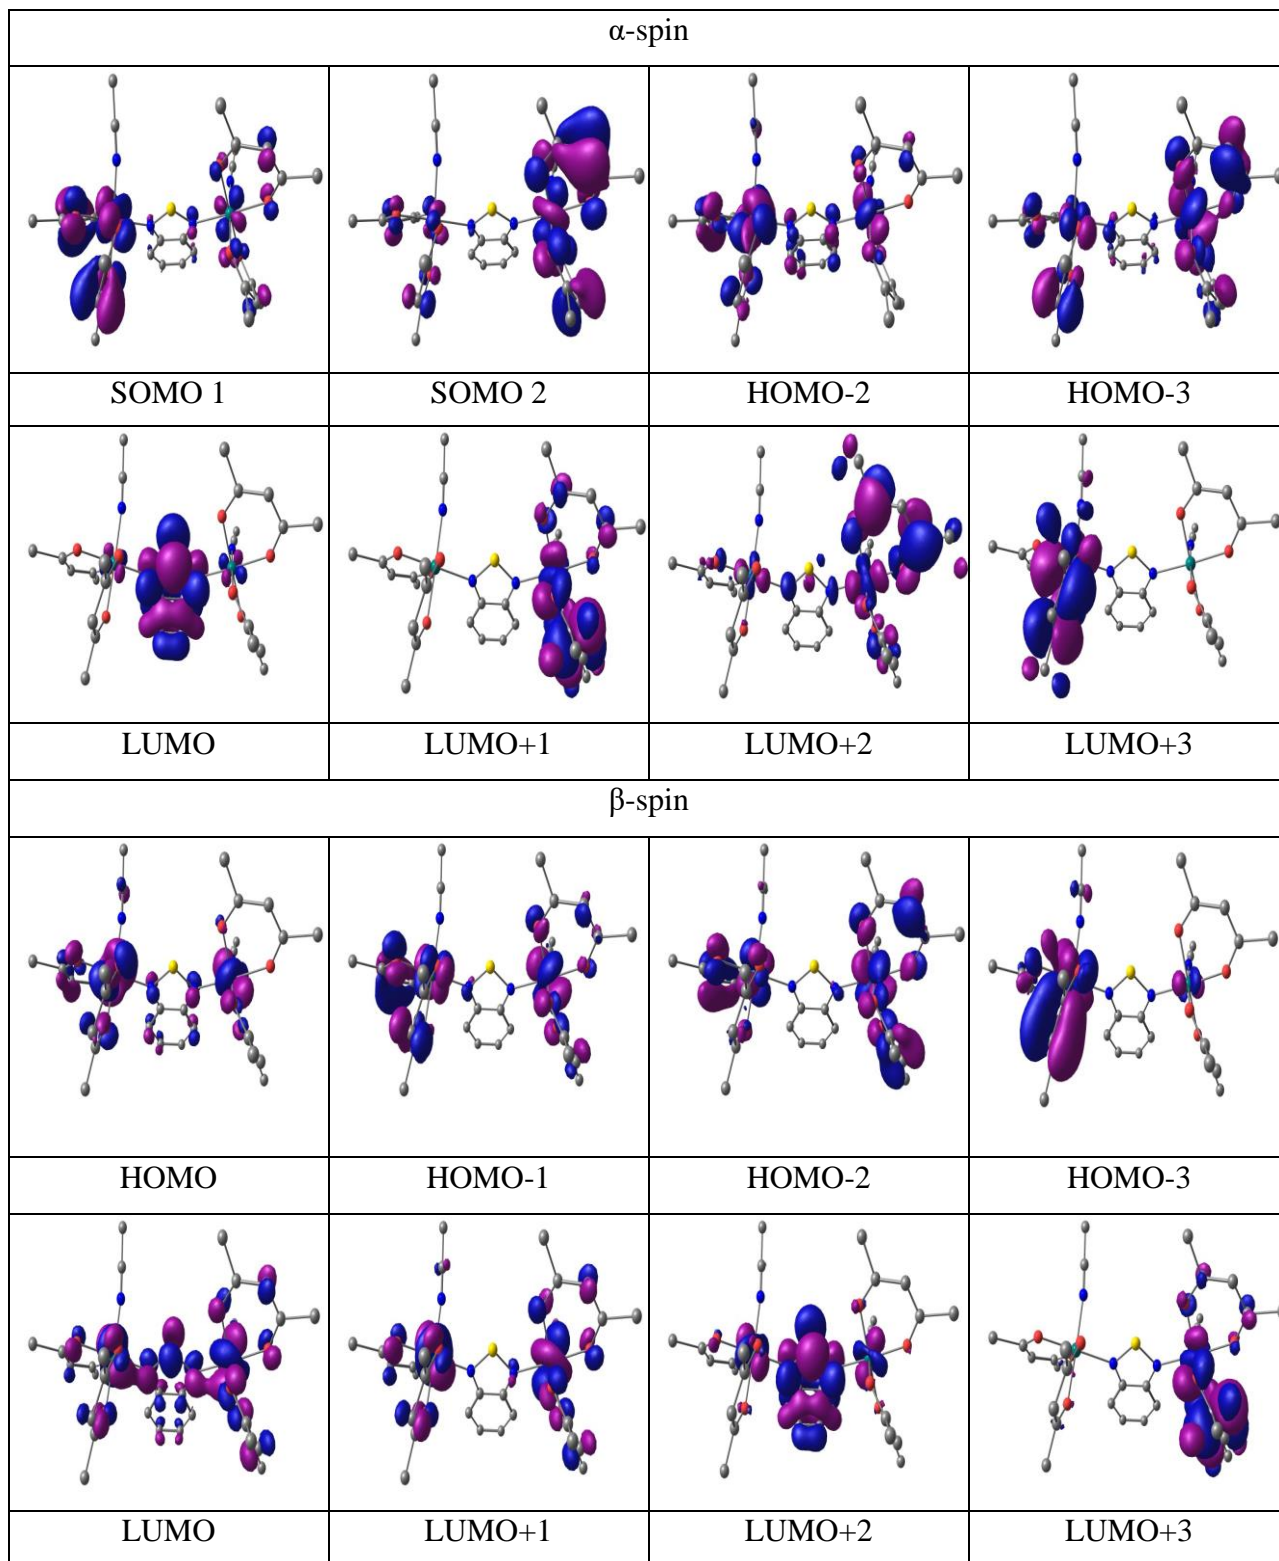

**Table S7** Composition and energies of selected molecular orbitals of **1<sup>+</sup>** (*S*=1/2)

| MO             | Energy (eV) | % Composition |      |     |                    |
|----------------|-------------|---------------|------|-----|--------------------|
|                |             | Ru            | acac | BTD | CH <sub>3</sub> CN |
| $\alpha$ -spin |             |               |      |     |                    |
| LUMO+5         | -2.256      | 35            | 20   | 29  | 16                 |
| LUMO+4         | -2.841      | 5             | 89   | 5   | 1                  |
| LUMO+3         | -3.044      | 4             | 93   | 2   | 1                  |
| LUMO+2         | -3.112      | 3             | 86   | 10  | 1                  |
| LUMO+1         | -3.192      | 5             | 90   | 5   | 0                  |
| LUMO           | -4.730      | 9             | 3    | 87  | 0                  |
| SOMO           | -7.610      | 45            | 44   | 9   | 2                  |
| HOMO-1         | -7.741      | 48            | 46   | 4   | 2                  |
| HOMO-2         | -7.902      | 50            | 43   | 5   | 2                  |
| HOMO-3         | -8.176      | 46            | 46   | 7   | 1                  |
| HOMO-4         | -8.211      | 73            | 18   | 6   | 3                  |
| HOMO-5         | -8.432      | 70            | 20   | 6   | 3                  |
| $\beta$ -spin  |             |               |      |     |                    |
| LUMO+5         | -2.816      | 5             | 89   | 6   | 1                  |
| LUMO+4         | -3.026      | 4             | 93   | 2   | 1                  |
| LUMO+3         | -3.096      | 4             | 84   | 11  | 1                  |
| LUMO+2         | -3.166      | 5             | 88   | 6   | 0                  |
| LUMO+1         | -4.542      | 29            | 8    | 61  | 1                  |
| LUMO           | -5.645      | 67            | 21   | 10  | 2                  |
| HOMO           | -7.193      | 38            | 26   | 34  | 1                  |
| HOMO-1         | -7.587      | 55            | 40   | 3   | 2                  |
| HOMO-2         | -7.846      | 62            | 30   | 6   | 2                  |
| HOMO-3         | -8.003      | 70            | 21   | 6   | 3                  |
| HOMO-4         | -8.214      | 71            | 19   | 7   | 3                  |
| HOMO-5         | -8.439      | 27            | 70   | 2   | 2                  |

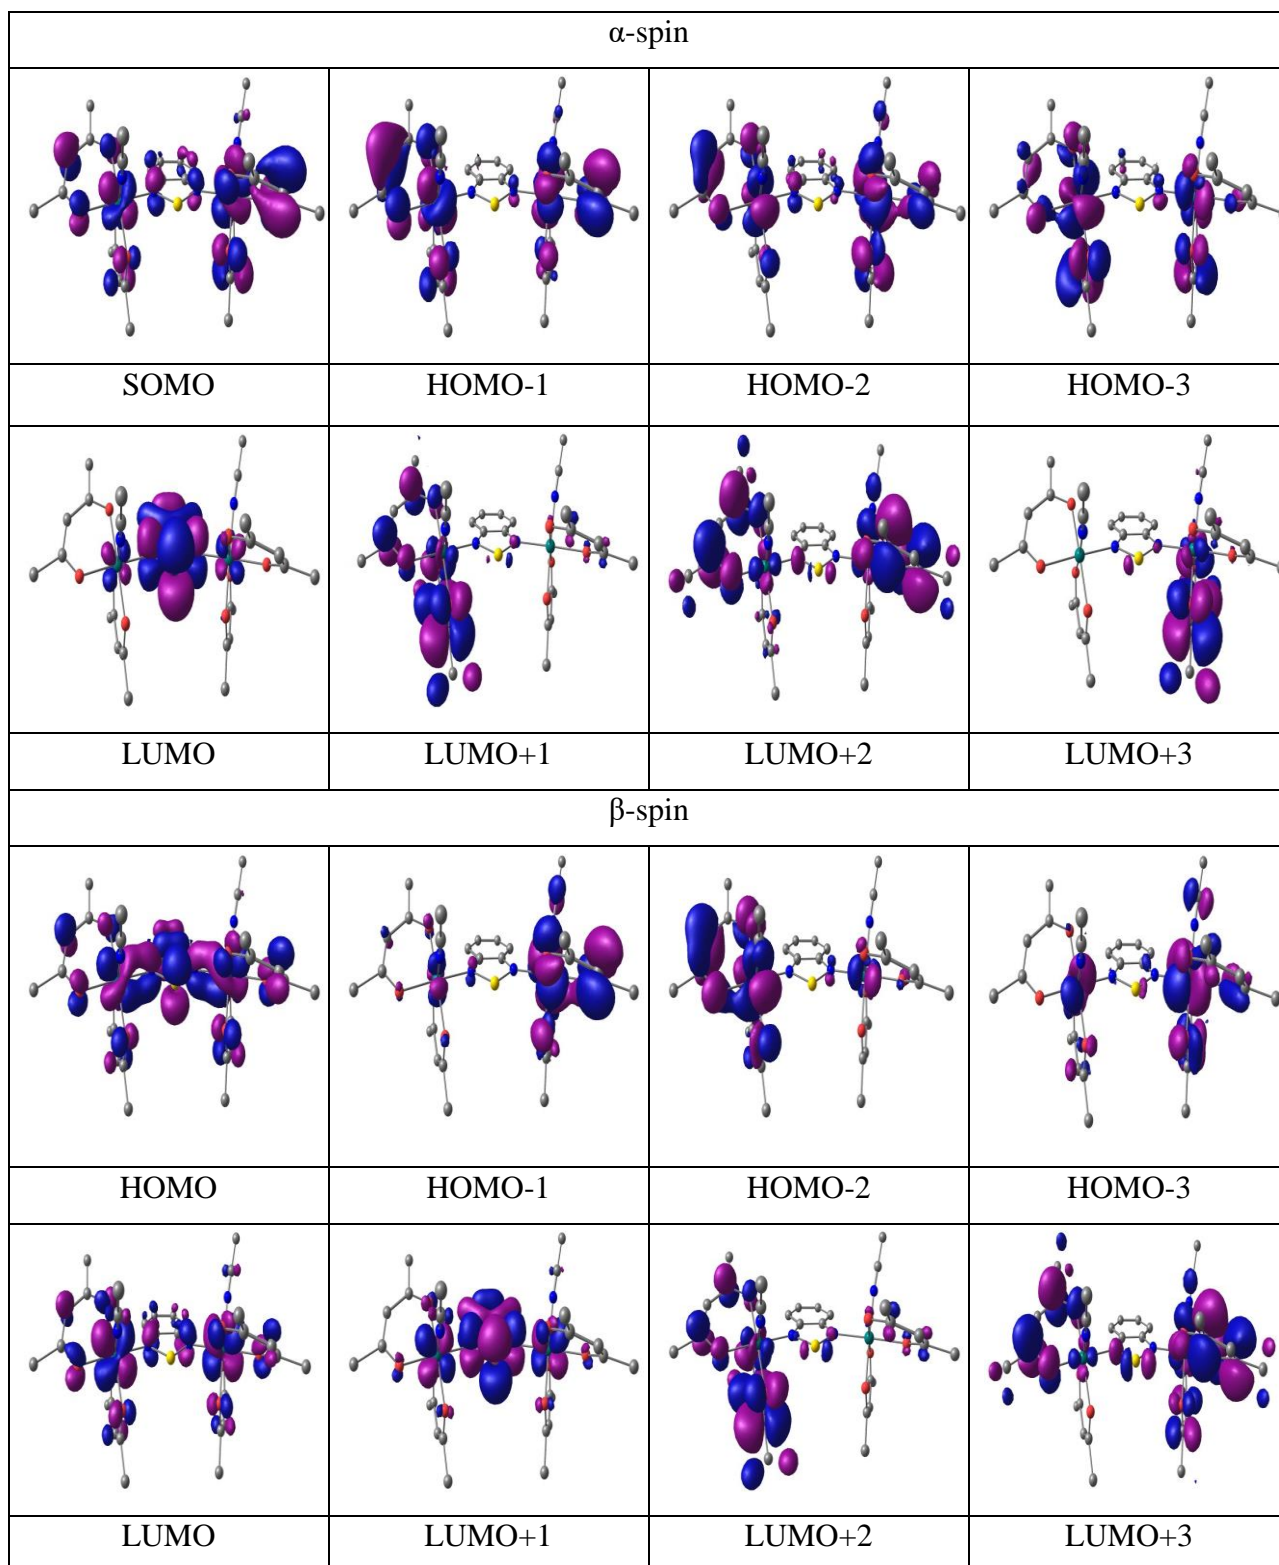

**Table S8** Composition and energies of selected molecular orbitals of **1** ( $S=0$ )

| MO     | Energy (eV) | % Composition |      |     |                    |
|--------|-------------|---------------|------|-----|--------------------|
|        |             | Ru            | acac | BTD | CH <sub>3</sub> CN |
| LUMO+5 | 0.337       | 40            | 22   | 3   | 35                 |
| LUMO+4 | -0.524      | 5             | 92   | 2   | 2                  |
| LUMO+3 | -0.549      | 4             | 90   | 4   | 2                  |
| LUMO+2 | -0.605      | 4             | 94   | 2   | 0                  |
| LUMO+1 | -0.625      | 4             | 94   | 1   | 0                  |
| LUMO   | -1.652      | 8             | 4    | 87  | 1                  |
| HOMO   | -3.418      | 53            | 15   | 30  | 2                  |
| HOMO-1 | -4.591      | 56            | 35   | 7   | 2                  |
| HOMO-2 | -5.001      | 44            | 33   | 21  | 2                  |
| HOMO-3 | -5.129      | 68            | 27   | 3   | 2                  |
| HOMO-4 | -5.209      | 57            | 25   | 17  | 2                  |
| HOMO-5 | -5.243      | 11            | 4    | 84  | 1                  |

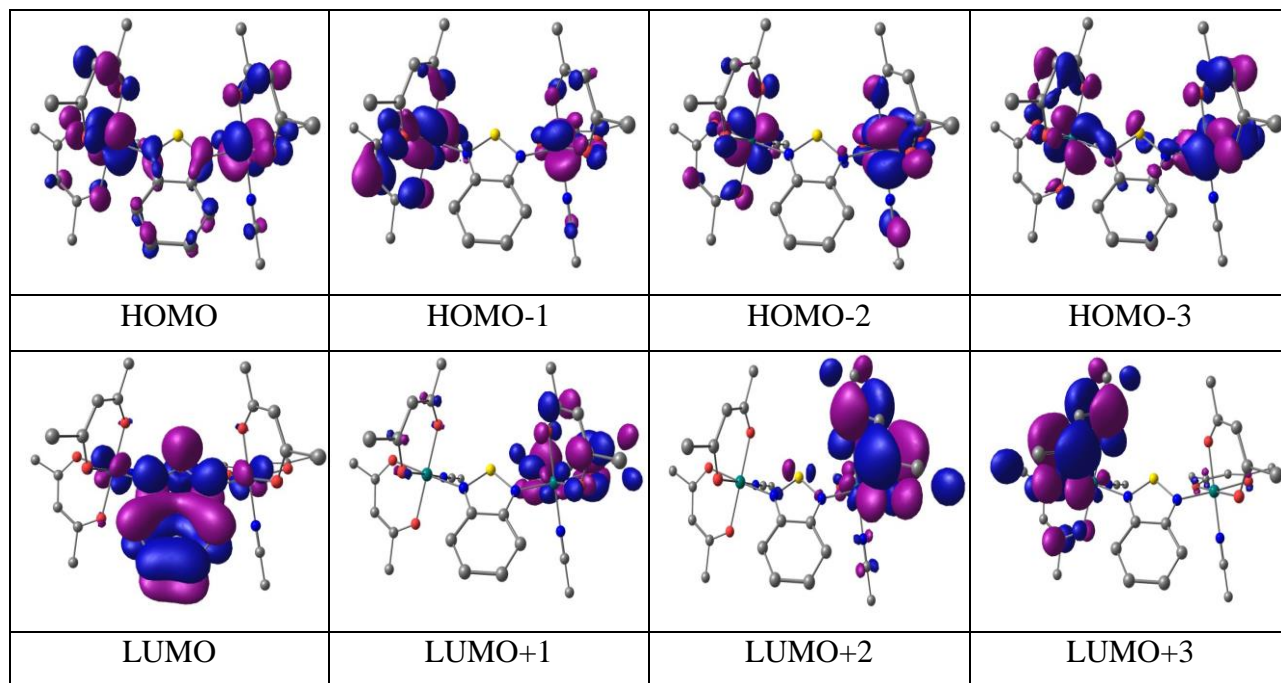

**Table S9** Composition and energies of selected molecular orbitals of **1<sup>-</sup>** (*S*=1/2)

| MO             | Energy (eV) | % Composition |      |     |                    |
|----------------|-------------|---------------|------|-----|--------------------|
|                |             | Ru            | acac | BTD | CH <sub>3</sub> CN |
| $\alpha$ -spin |             |               |      |     |                    |
| LUMO+5         | 3.151       | 6             | 77   | 9   | 8                  |
| LUMO+4         | 3.123       | 38            | 10   | 11  | 41                 |
| LUMO+3         | 2.321       | 0             | 95   | 2   | 3                  |
| LUMO+2         | 2.240       | 4             | 44   | 44  | 8                  |
| LUMO+1         | 2.210       | 0             | 98   | 1   | 1                  |
| LUMO           | 2.109       | 15            | 54   | 19  | 12                 |
| SOMO           | 0.479       | 5             | 23   | 71  | 1                  |
| HOMO-1         | -1.303      | 30            | 55   | 14  | 1                  |
| HOMO-2         | -1.709      | 10            | 86   | 3   | 2                  |
| HOMO-3         | -1.751      | 35            | 53   | 10  | 2                  |
| HOMO-4         | -1.794      | 67            | 20   | 9   | 4                  |
| HOMO-5         | -1.924      | 12            | 82   | 6   | 0                  |
| $\beta$ -spin  |             |               |      |     |                    |
| LUMO+5         | 3.128       | 36            | 15   | 10  | 39                 |
| LUMO+4         | 2.326       | 1             | 90   | 6   | 3                  |
| LUMO+3         | 2.294       | 5             | 49   | 44  | 3                  |
| LUMO+2         | 2.240       | 4             | 51   | 39  | 6                  |
| LUMO+1         | 2.191       | 2             | 78   | 18  | 2                  |
| LUMO           | 2.098       | 13            | 53   | 22  | 11                 |
| HOMO           | -1.045      | 27            | 51   | 21  | 1                  |
| HOMO-1         | -1.645      | 37            | 52   | 10  | 2                  |
| HOMO-2         | -1.706      | 6             | 91   | 2   | 1                  |
| HOMO-3         | -1.778      | 71            | 15   | 9   | 5                  |
| HOMO-4         | -1.890      | 8             | 87   | 4   | 1                  |
| HOMO-5         | -1.976      | 71            | 16   | 9   | 4                  |



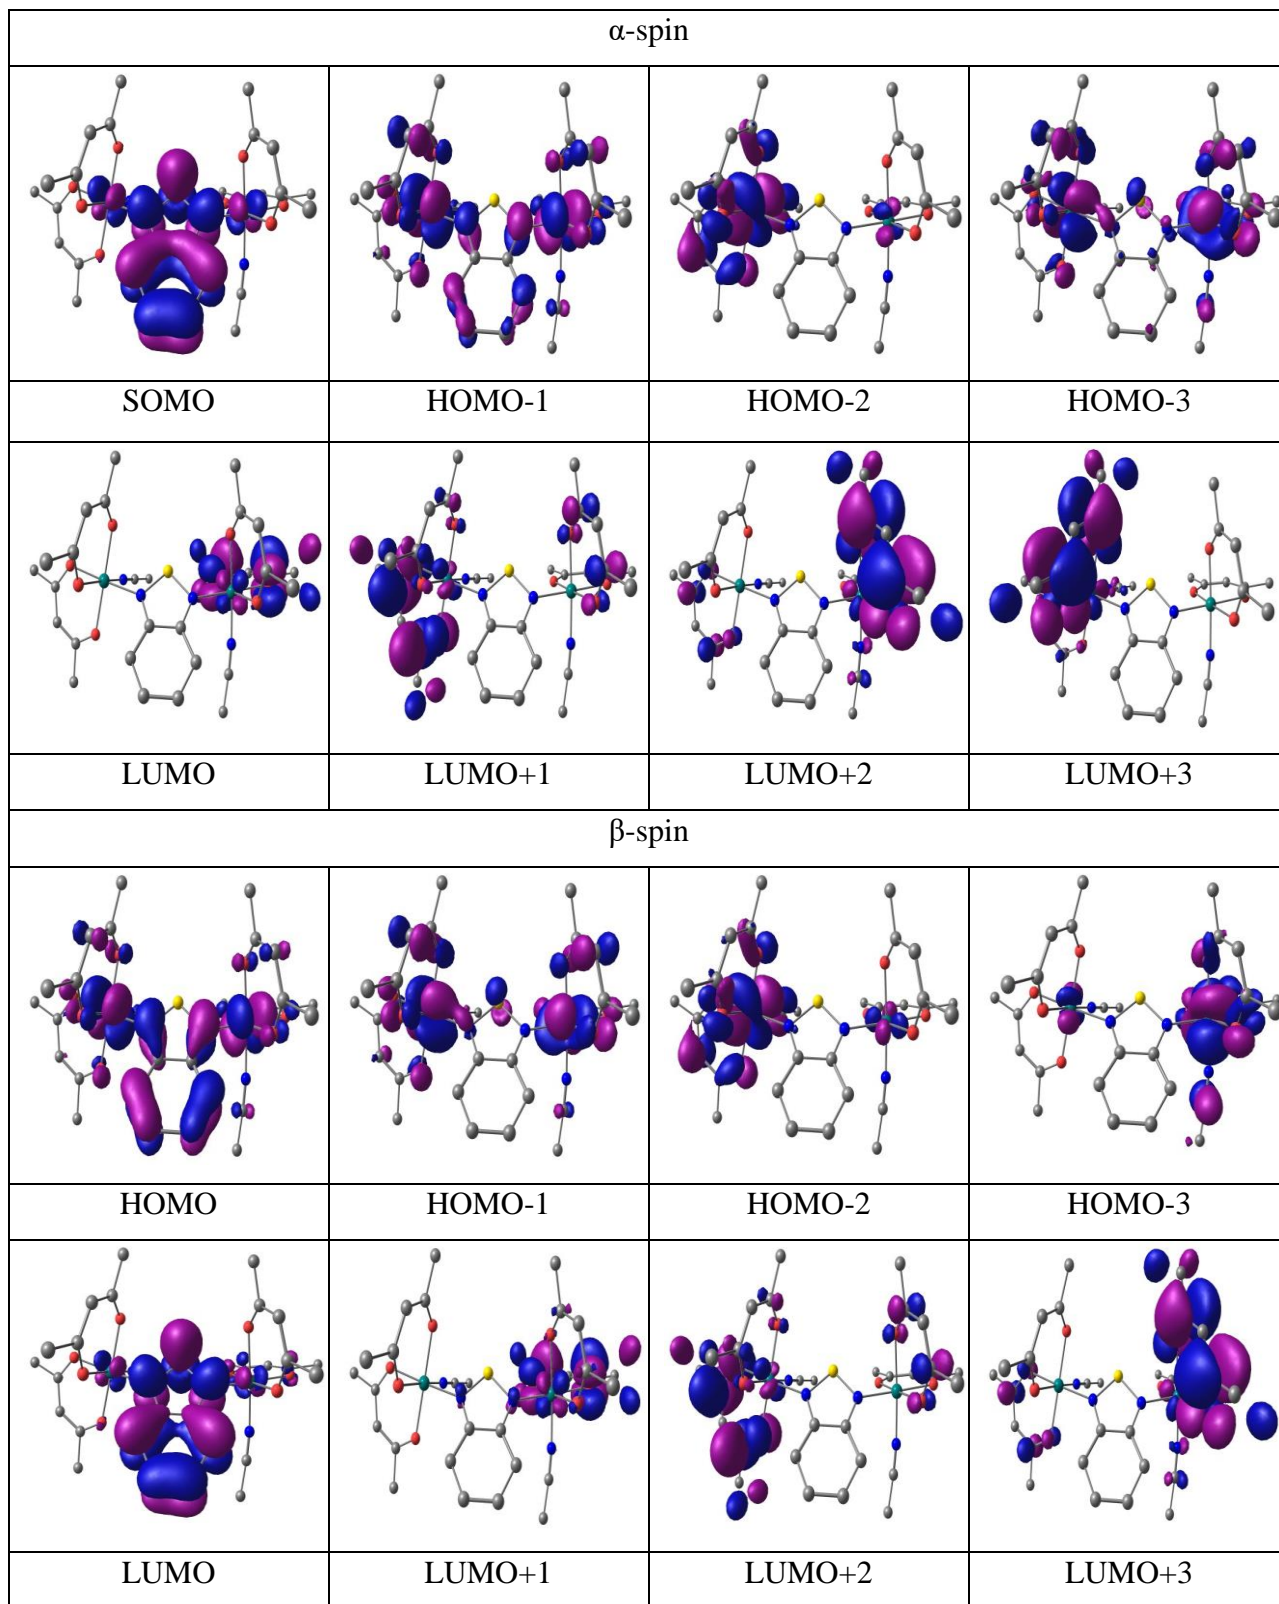



**Table S10** Composition and energies of selected molecular orbitals of  $2^{2+}$  ( $S=1$ )

| MO             | Energy (eV) | % Composition |      |     |                    |
|----------------|-------------|---------------|------|-----|--------------------|
|                |             | Ru            | acac | BTD | CH <sub>3</sub> CN |
| $\alpha$ -spin |             |               |      |     |                    |
| LUMO+5         | -6.053      | 32            | 51   | 15  | 2                  |
| LUMO+4         | -6.087      | 5             | 86   | 8   | 0                  |
| LUMO+3         | -6.285      | 44            | 28   | 28  | 0                  |
| LUMO+2         | -6.379      | 47            | 39   | 13  | 0                  |
| LUMO+1         | -7.444      | 3             | 1    | 96  | 0                  |
| LUMO           | -8.115      | 6             | 2    | 92  | 0                  |
| SOMO 1         | -10.937     | 22            | 69   | 8   | 1                  |
| SOMO 2         | -11.064     | 25            | 65   | 8   | 1                  |
| HOMO-2         | -11.111     | 21            | 62   | 17  | 0                  |
| HOMO-3         | -11.215     | 21            | 48   | 32  | 0                  |
| HOMO-4         | -11.320     | 23            | 57   | 21  | 0                  |
| HOMO-5         | -11.553     | 34            | 37   | 27  | 2                  |
| $\beta$ -spin  |             |               |      |     |                    |
| LUMO+5         | -6.083      | 12            | 77   | 11  | 0                  |
| LUMO+4         | -6.172      | 30            | 63   | 8   | 0                  |
| LUMO+3         | -7.431      | 4             | 1    | 95  | 0                  |
| LUMO+2         | -7.936      | 18            | 5    | 77  | 1                  |
| LUMO+1         | -8.965      | 65            | 28   | 7   | 0                  |
| LUMO           | -9.001      | 53            | 25   | 19  | 3                  |
| HOMO           | -10.797     | 27            | 67   | 5   | 1                  |
| HOMO-1         | -10.972     | 36            | 34   | 30  | 0                  |
| HOMO-2         | -11.042     | 31            | 53   | 16  | 0                  |
| HOMO-3         | -11.218     | 41            | 55   | 2   | 3                  |
| HOMO-4         | -11.319     | 38            | 42   | 18  | 1                  |
| HOMO-5         | -11.463     | 63            | 26   | 8   | 3                  |

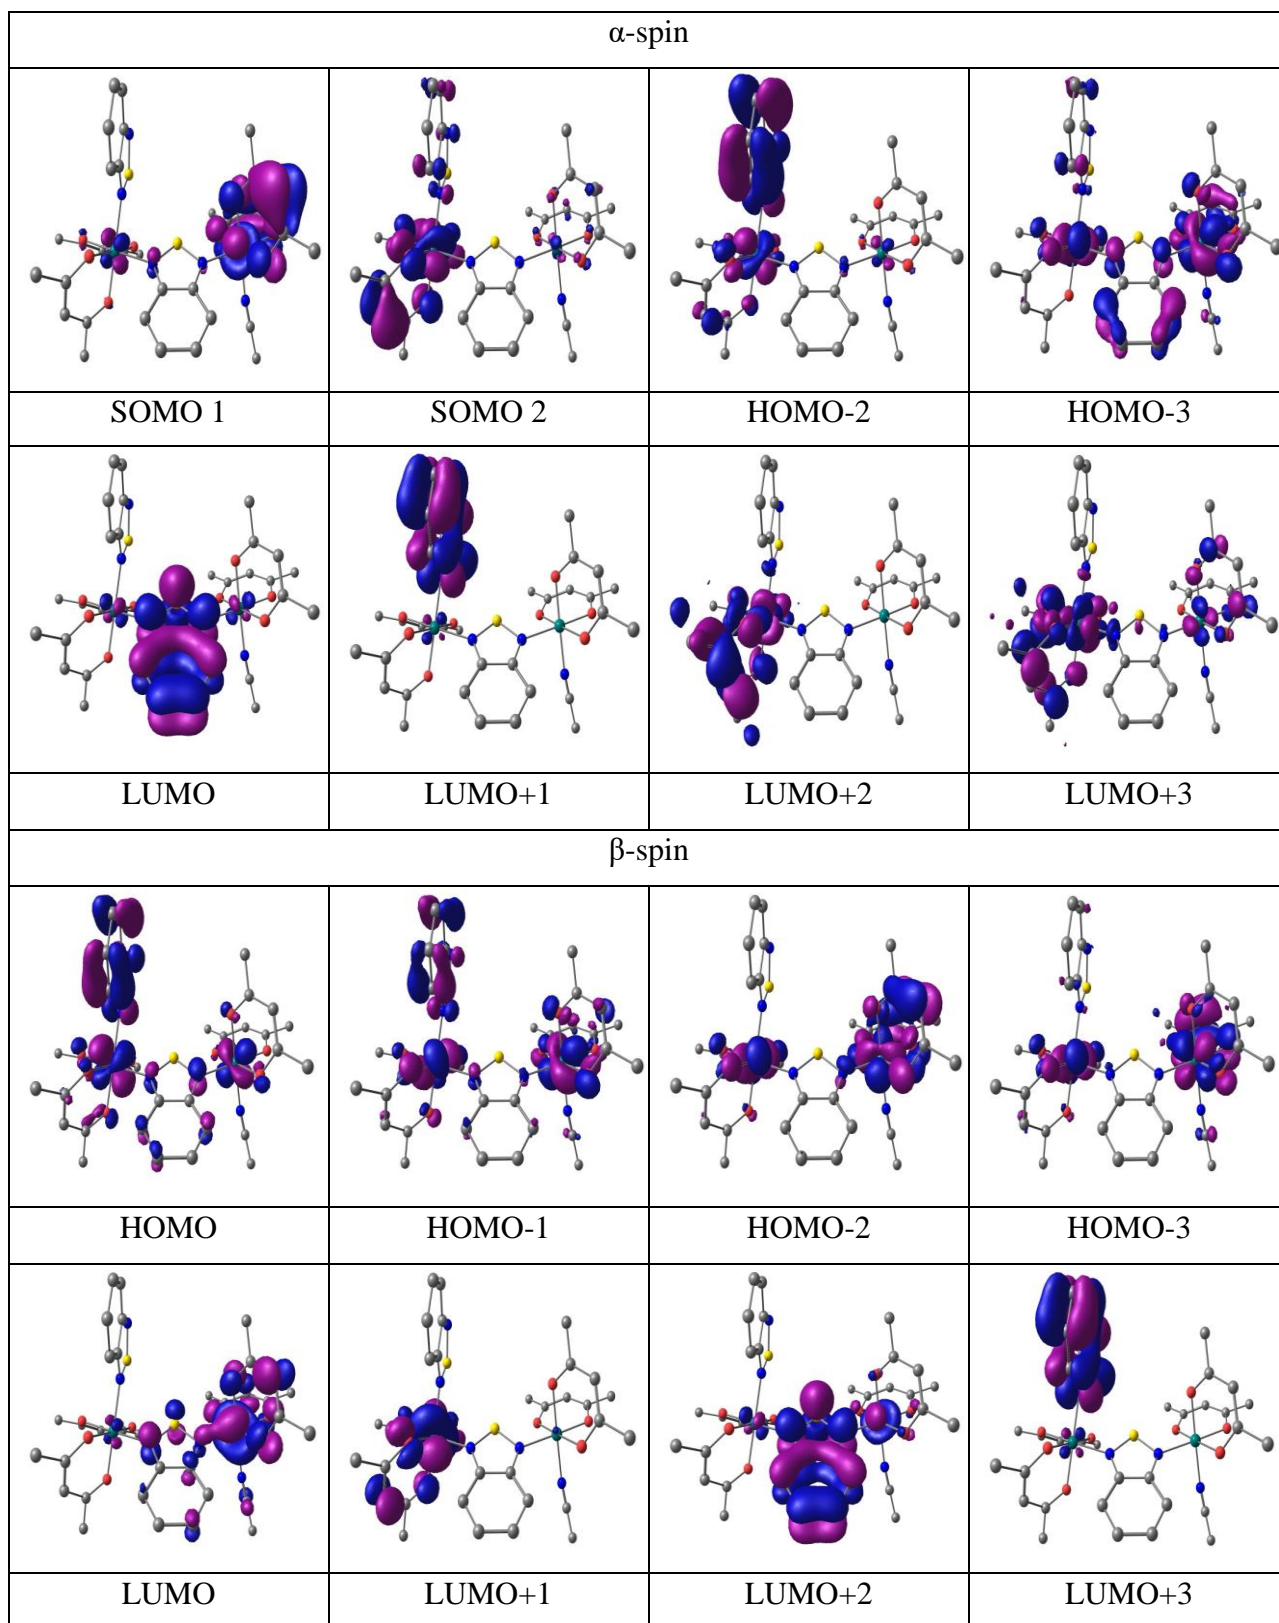

**Table S11** Composition and energies of selected molecular orbitals of **2<sup>+</sup>** (*S*=1/2)

| MO             | Energy (eV) | % Composition |      |     |                    |
|----------------|-------------|---------------|------|-----|--------------------|
|                |             | Ru            | acac | BTD | CH <sub>3</sub> CN |
| $\alpha$ -spin |             |               |      |     |                    |
| LUMO+5         | -3.148      | 10            | 83   | 7   | 0                  |
| LUMO+4         | -3.191      | 3             | 93   | 3   | 0                  |
| LUMO+3         | -3.326      | 9             | 82   | 9   | 0                  |
| LUMO+2         | -3.373      | 4             | 88   | 7   | 1                  |
| LUMO+1         | -4.808      | 5             | 1    | 94  | 0                  |
| LUMO           | -5.129      | 6             | 2    | 92  | 0                  |
| SOMO           | -7.696      | 42            | 53   | 5   | 0                  |
| HOMO-1         | -8.049      | 52            | 33   | 16  | 0                  |
| HOMO-2         | -8.111      | 35            | 57   | 7   | 1                  |
| HOMO-3         | -8.268      | 43            | 43   | 13  | 1                  |
| HOMO-4         | -8.413      | 25            | 65   | 9   | 1                  |
| HOMO-5         | -8.627      | 41            | 44   | 14  | 1                  |
| $\beta$ -spin  |             |               |      |     |                    |
| LUMO+5         | -3.176      | 2             | 94   | 4   | 0                  |
| LUMO+4         | -3.296      | 5             | 87   | 8   | 0                  |
| LUMO+3         | -3.353      | 3             | 89   | 7   | 1                  |
| LUMO+2         | -4.749      | 10            | 3    | 88  | 0                  |
| LUMO+1         | -5.041      | 17            | 4    | 77  | 1                  |
| LUMO           | -6.292      | 69            | 17   | 12  | 2                  |
| HOMO           | -7.487      | 51            | 23   | 26  | 1                  |
| HOMO-1         | -7.604      | 47            | 45   | 8   | 0                  |
| HOMO-2         | -7.914      | 59            | 25   | 16  | 0                  |
| HOMO-3         | -8.125      | 47            | 48   | 3   | 2                  |
| HOMO-4         | -8.434      | 16            | 77   | 7   | 0                  |
| HOMO-5         | -8.523      | 72            | 19   | 6   | 4                  |

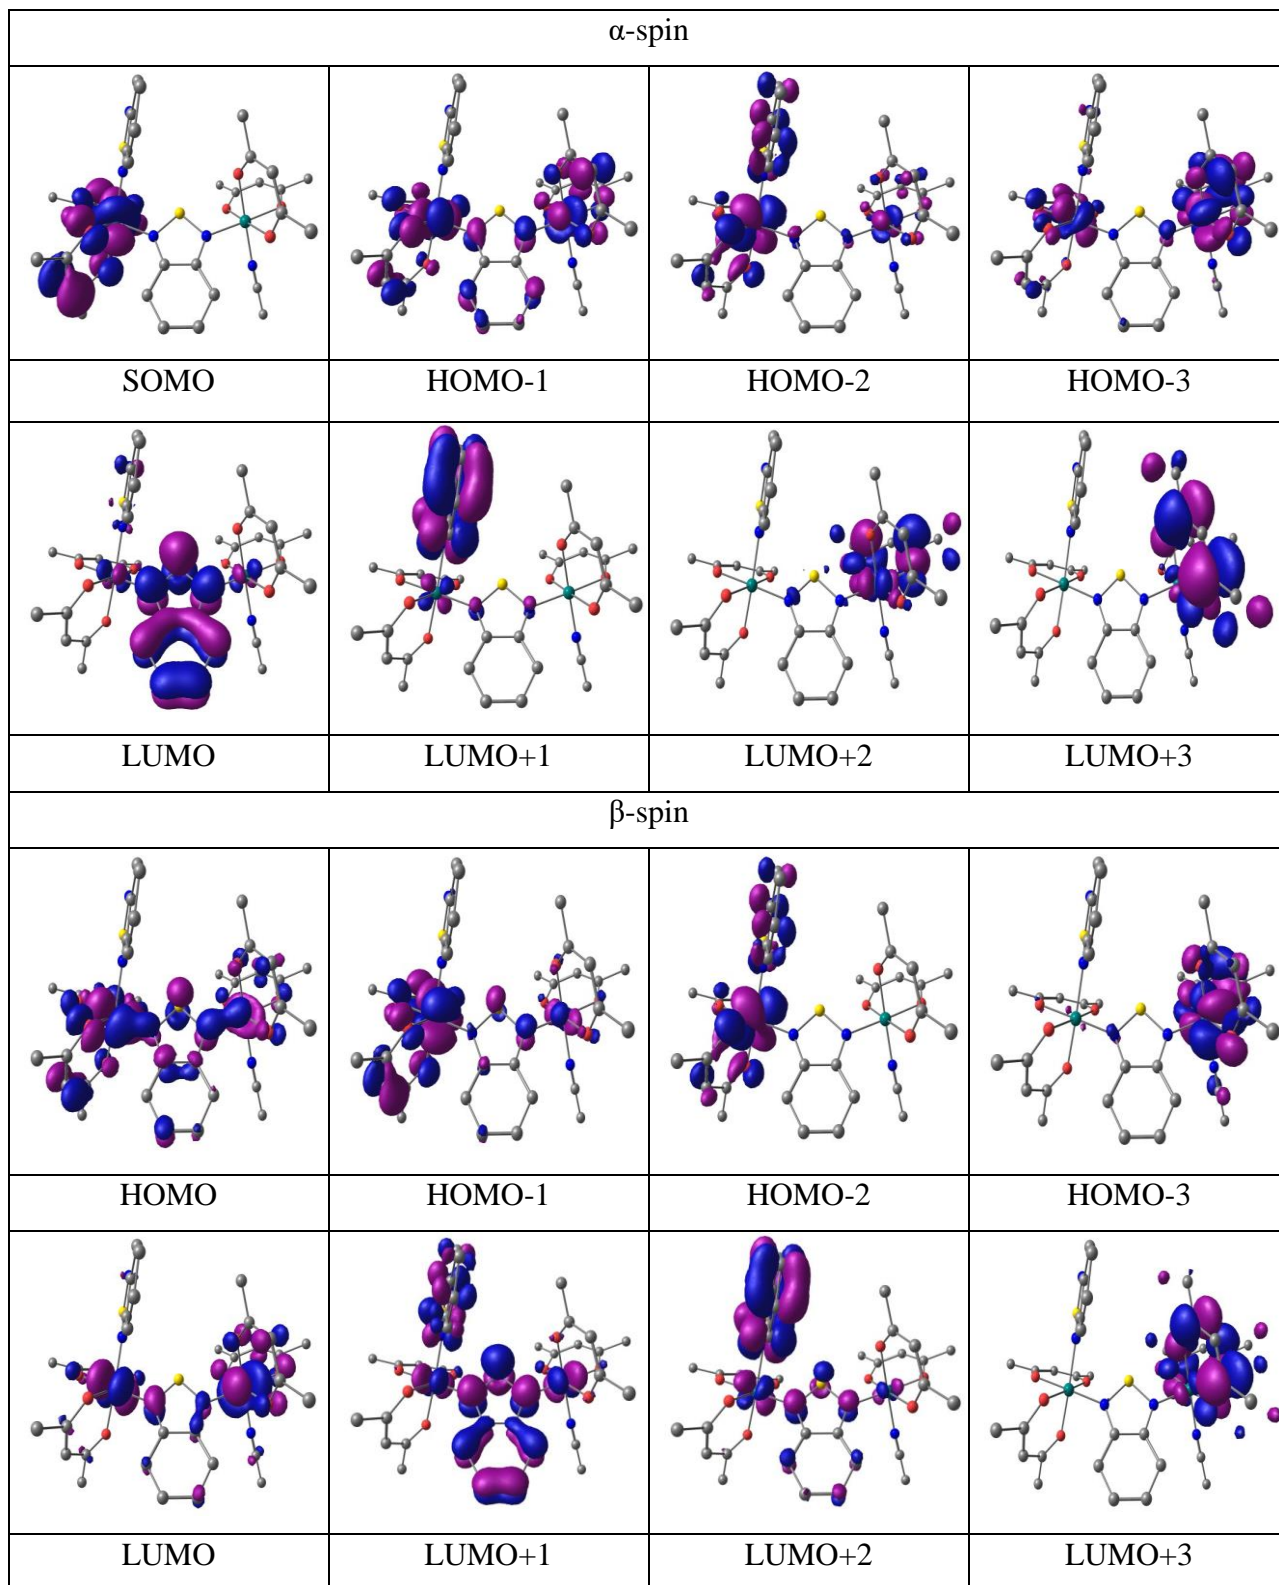

**Table S12** Composition and energies of selected molecular orbitals of **2** ( $S=0$ )

| MO     | Energy (eV) | % Composition |      |     |                    |
|--------|-------------|---------------|------|-----|--------------------|
|        |             | Ru            | acac | BTD | CH <sub>3</sub> CN |
| LUMO+5 | -0.432      | 2             | 94   | 2   | 1                  |
| LUMO+4 | -0.497      | 4             | 87   | 8   | 0                  |
| LUMO+3 | -0.606      | 3             | 93   | 4   | 0                  |
| LUMO+2 | -1.171      | 52            | 18   | 30  | 0                  |
| LUMO+1 | -2.134      | 13            | 3    | 83  | 1                  |
| LUMO   | -2.243      | 4             | 1    | 95  | 0                  |
| HOMO   | -4.364      | 66            | 24   | 9   | 2                  |
| HOMO-1 | -4.715      | 63            | 30   | 4   | 3                  |
| HOMO-2 | -4.797      | 70            | 26   | 3   | 1                  |
| HOMO-3 | -4.854      | 71            | 21   | 8   | 0                  |
| HOMO-4 | -5.059      | 74            | 16   | 5   | 5                  |
| HOMO-5 | -5.096      | 73            | 19   | 8   | 0                  |

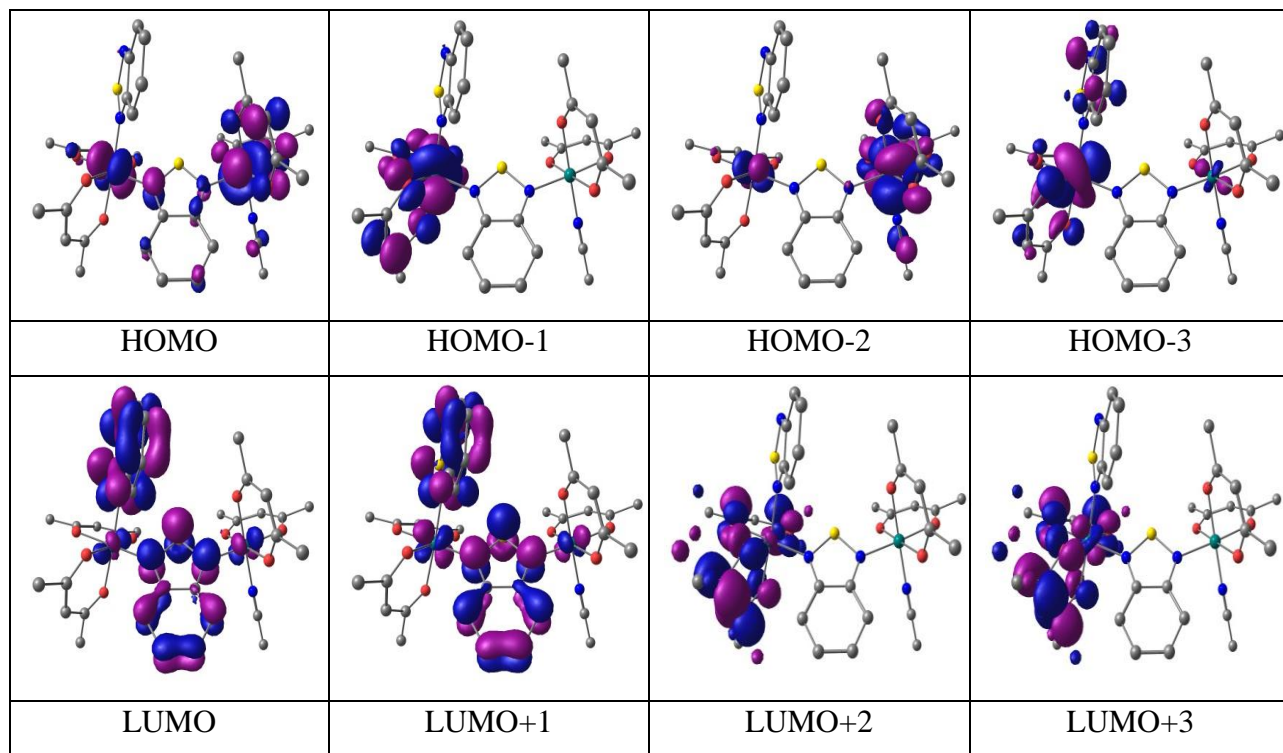

**Table S13** Composition and energies of selected molecular orbitals of  $2^-$  ( $S=1/2$ )

| MO             | Energy (eV) | % Composition |      |     |                    |
|----------------|-------------|---------------|------|-----|--------------------|
|                |             | Ru            | acac | BTD | CH <sub>3</sub> CN |
| $\alpha$ -spin |             |               |      |     |                    |
| LUMO+5         | 2.859       | 24            | 3    | 3   | 69                 |
| LUMO+4         | 2.029       | 8             | 88   | 4   | 0                  |
| LUMO+3         | 1.998       | 4             | 89   | 4   | 3                  |
| LUMO+2         | 1.914       | 2             | 95   | 3   | 0                  |
| LUMO+1         | 1.879       | 3             | 95   | 1   | 1                  |
| LUMO           | 0.715       | 11            | 5    | 84  | 0                  |
| SOMO           | -0.053      | 7             | 2    | 90  | 0                  |
| HOMO-1         | -1.693      | 67            | 15   | 17  | 1                  |
| HOMO-2         | -1.793      | 69            | 26   | 5   | 0                  |
| HOMO-3         | -1.997      | 71            | 15   | 14  | 0                  |
| HOMO-4         | -2.133      | 68            | 23   | 5   | 5                  |
| HOMO-5         | -2.232      | 72            | 19   | 9   | 1                  |
| $\beta$ -spin  |             |               |      |     |                    |
| LUMO+5         | 2.014       | 7             | 88   | 5   | 0                  |
| LUMO+4         | 1.999       | 4             | 89   | 4   | 3                  |
| LUMO+3         | 1.915       | 2             | 95   | 3   | 0                  |
| LUMO+2         | 1.886       | 3             | 93   | 2   | 1                  |
| LUMO+1         | 1.343       | 7             | 6    | 86  | 1                  |
| LUMO           | 1.161       | 4             | 2    | 94  | 0                  |
| HOMO           | -1.635      | 65            | 15   | 18  | 2                  |
| HOMO-1         | -1.811      | 69            | 26   | 5   | 0                  |
| HOMO-2         | -1.950      | 71            | 14   | 15  | 0                  |
| HOMO-3         | -2.116      | 67            | 23   | 6   | 4                  |
| HOMO-4         | -2.201      | 74            | 18   | 6   | 2                  |
| HOMO-5         | -2.387      | 75            | 14   | 6   | 5                  |



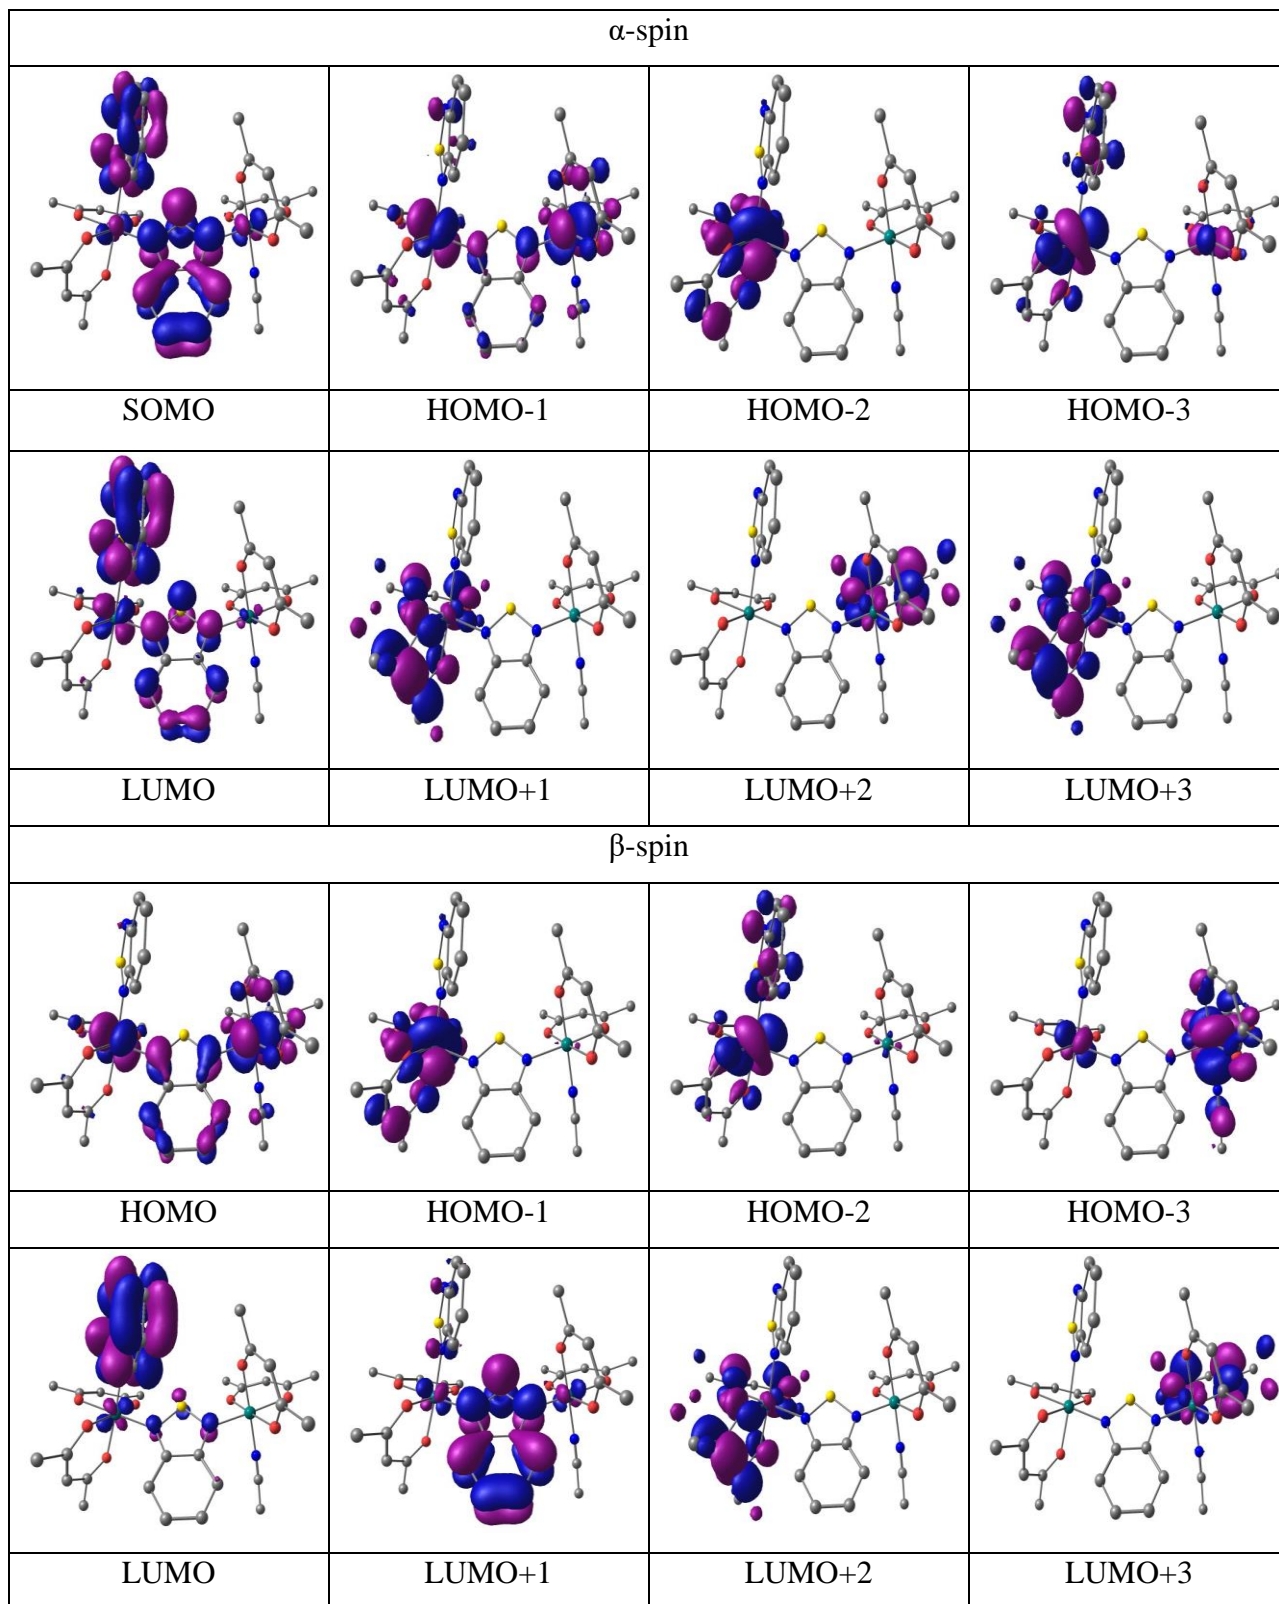

**Table S14** Composition and energies of selected molecular orbitals of  $2^{2-}$  ( $S=1$ )

| MO             | Energy (eV) | % Composition |      |     |                    |
|----------------|-------------|---------------|------|-----|--------------------|
|                |             | Ru            | acac | BTD | CH <sub>3</sub> CN |
| $\alpha$ -spin |             |               |      |     |                    |
| LUMO+5         | 4.966       | 6             | 2    | 0   | 92                 |
| LUMO+4         | 4.854       | 34            | 5    | 3   | 58                 |
| LUMO+3         | 4.707       | 10            | 85   | 4   | 1                  |
| LUMO+2         | 4.557       | 3             | 94   | 3   | 0                  |
| LUMO+1         | 4.246       | 4             | 87   | 3   | 5                  |
| LUMO           | 3.968       | 4             | 93   | 1   | 1                  |
| SOMO 1         | 3.099       | 6             | 5    | 89  | 0                  |
| SOMO 2         | 2.724       | 9             | 4    | 86  | 1                  |
| HOMO-2         | 1.237       | 73            | 21   | 5   | 0                  |
| HOMO-3         | 1.085       | 66            | 12   | 21  | 1                  |
| HOMO-4         | 1.062       | 74            | 15   | 12  | 0                  |
| HOMO-5         | 0.337       | 64            | 21   | 12  | 3                  |
| $\beta$ -spin  |             |               |      |     |                    |
| LUMO+5         | 4.861       | 34            | 5    | 3   | 59                 |
| LUMO+4         | 4.710       | 5             | 73   | 21  | 0                  |
| LUMO+3         | 4.591       | 4             | 92   | 4   | 0                  |
| LUMO+2         | 4.465       | 9             | 16   | 67  | 8                  |
| LUMO+1         | 4.247       | 4             | 88   | 3   | 4                  |
| LUMO           | 3.978       | 3             | 94   | 3   | 1                  |
| HOMO           | 1.417       | 59            | 11   | 30  | 0                  |
| HOMO-1         | 1.268       | 73            | 19   | 8   | 0                  |
| HOMO-2         | 1.205       | 72            | 16   | 12  | 0                  |
| HOMO-3         | 0.512       | 60            | 16   | 21  | 3                  |
| HOMO-4         | 0.200       | 34            | 9    | 56  | 0                  |
| HOMO-5         | 0.149       | 73            | 19   | 2   | 6                  |



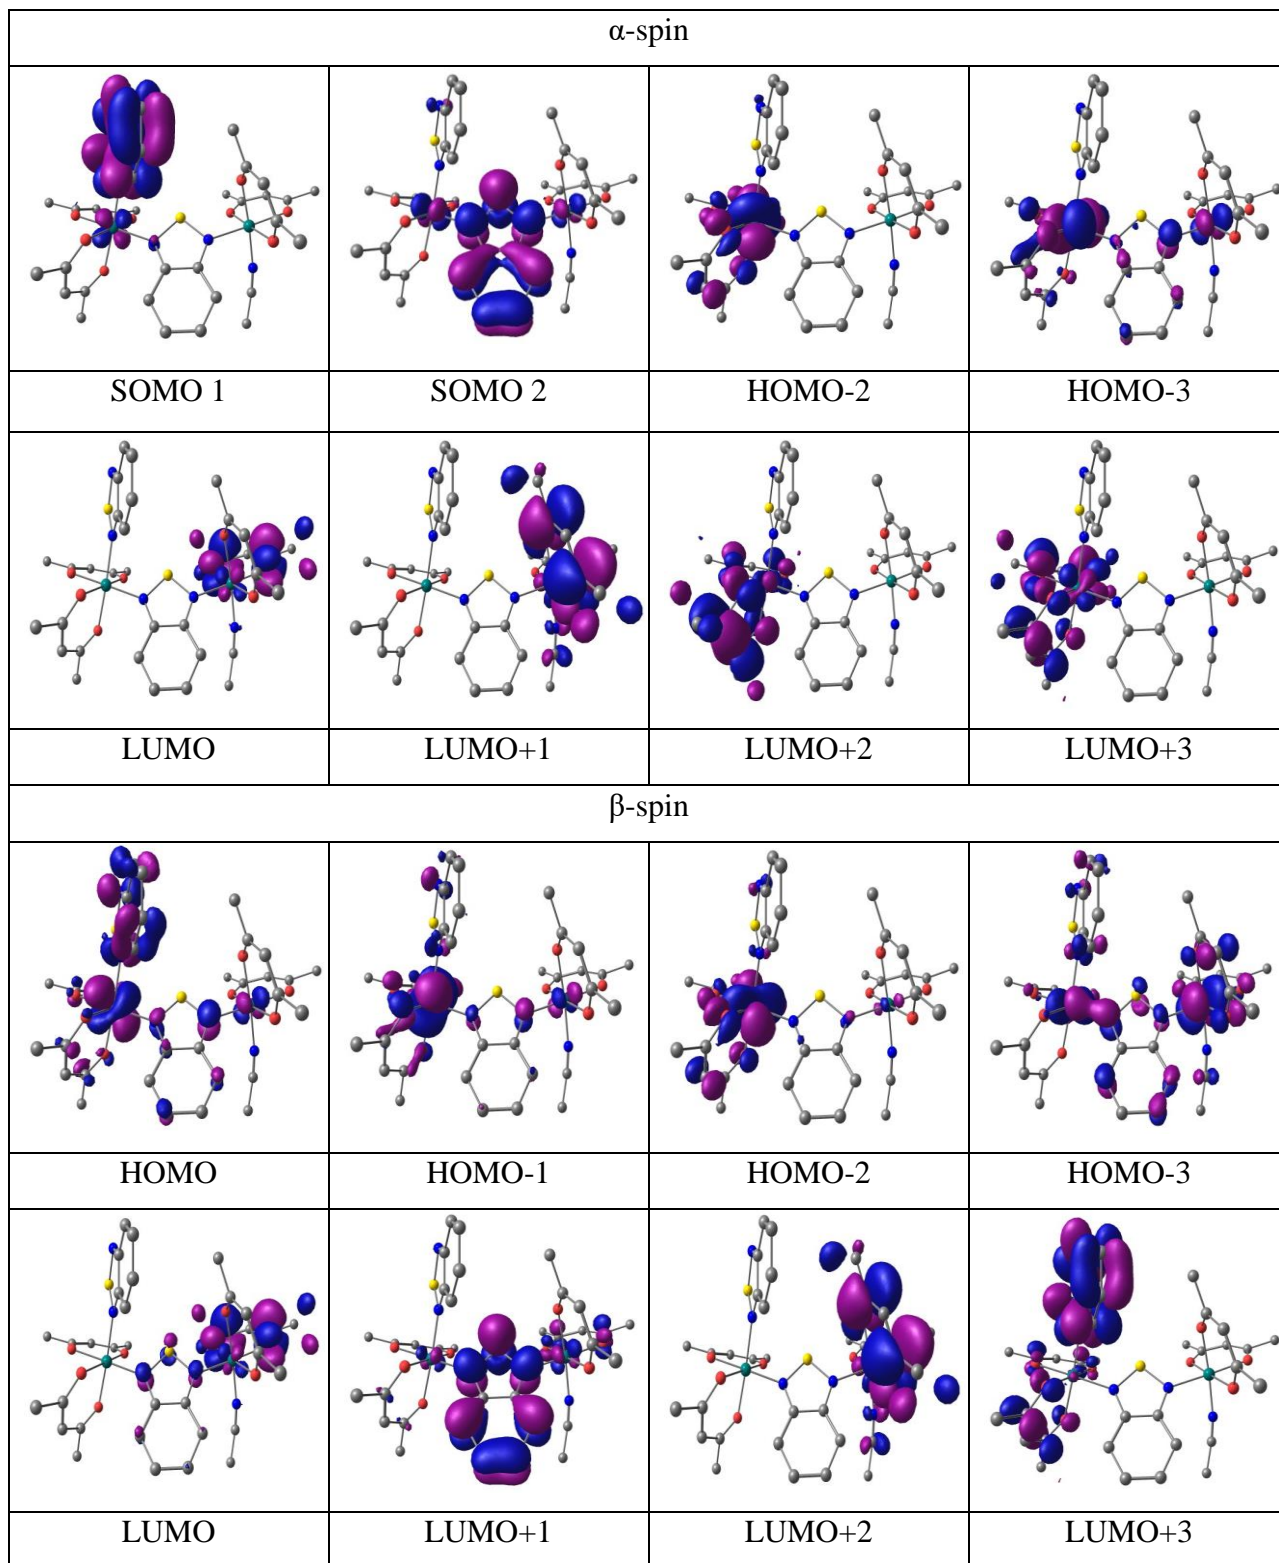

**Table S15** Composition and energies of selected molecular orbitals of  $3^{2+}$  ( $S=1$ )

| MO             | Energy (eV) | % Composition |      |     |
|----------------|-------------|---------------|------|-----|
|                |             | Ru            | acac | BTD |
| $\alpha$ -spin |             |               |      |     |
| LUMO+5         | -6.095      | 26            | 64   | 10  |
| LUMO+4         | -6.141      | 8             | 59   | 33  |
| LUMO+3         | -6.197      | 44            | 22   | 34  |
| LUMO+2         | -7.544      | 3             | 1    | 96  |
| LUMO+1         | -7.555      | 3             | 1    | 96  |
| LUMO           | -8.196      | 7             | 2    | 91  |
| SOMO 1         | -10.899     | 28            | 59   | 13  |
| SOMO 2         | -11.017     | 17            | 73   | 10  |
| HOMO-2         | -11.096     | 24            | 68   | 7   |
| HOMO-3         | -11.135     | 18            | 76   | 5   |
| HOMO-4         | -11.433     | 18            | 22   | 60  |
| HOMO-5         | -11.449     | 14            | 20   | 66  |
| $\beta$ -spin  |             |               |      |     |
| LUMO+5         | -6.113      | 3             | 57   | 40  |
| LUMO+4         | -7.336      | 14            | 3    | 83  |
| LUMO+3         | -7.376      | 10            | 3    | 87  |
| LUMO+2         | -7.960      | 15            | 3    | 81  |
| LUMO+1         | -8.816      | 60            | 21   | 18  |
| LUMO           | -9.214      | 45            | 22   | 32  |
| HOMO           | -10.828     | 35            | 57   | 7   |
| HOMO-1         | -10.907     | 22            | 72   | 5   |
| HOMO-2         | -11.180     | 31            | 49   | 21  |
| HOMO-3         | -11.184     | 21            | 57   | 22  |
| HOMO-4         | -11.325     | 21            | 63   | 17  |
| HOMO-5         | -11.359     | 59            | 23   | 18  |

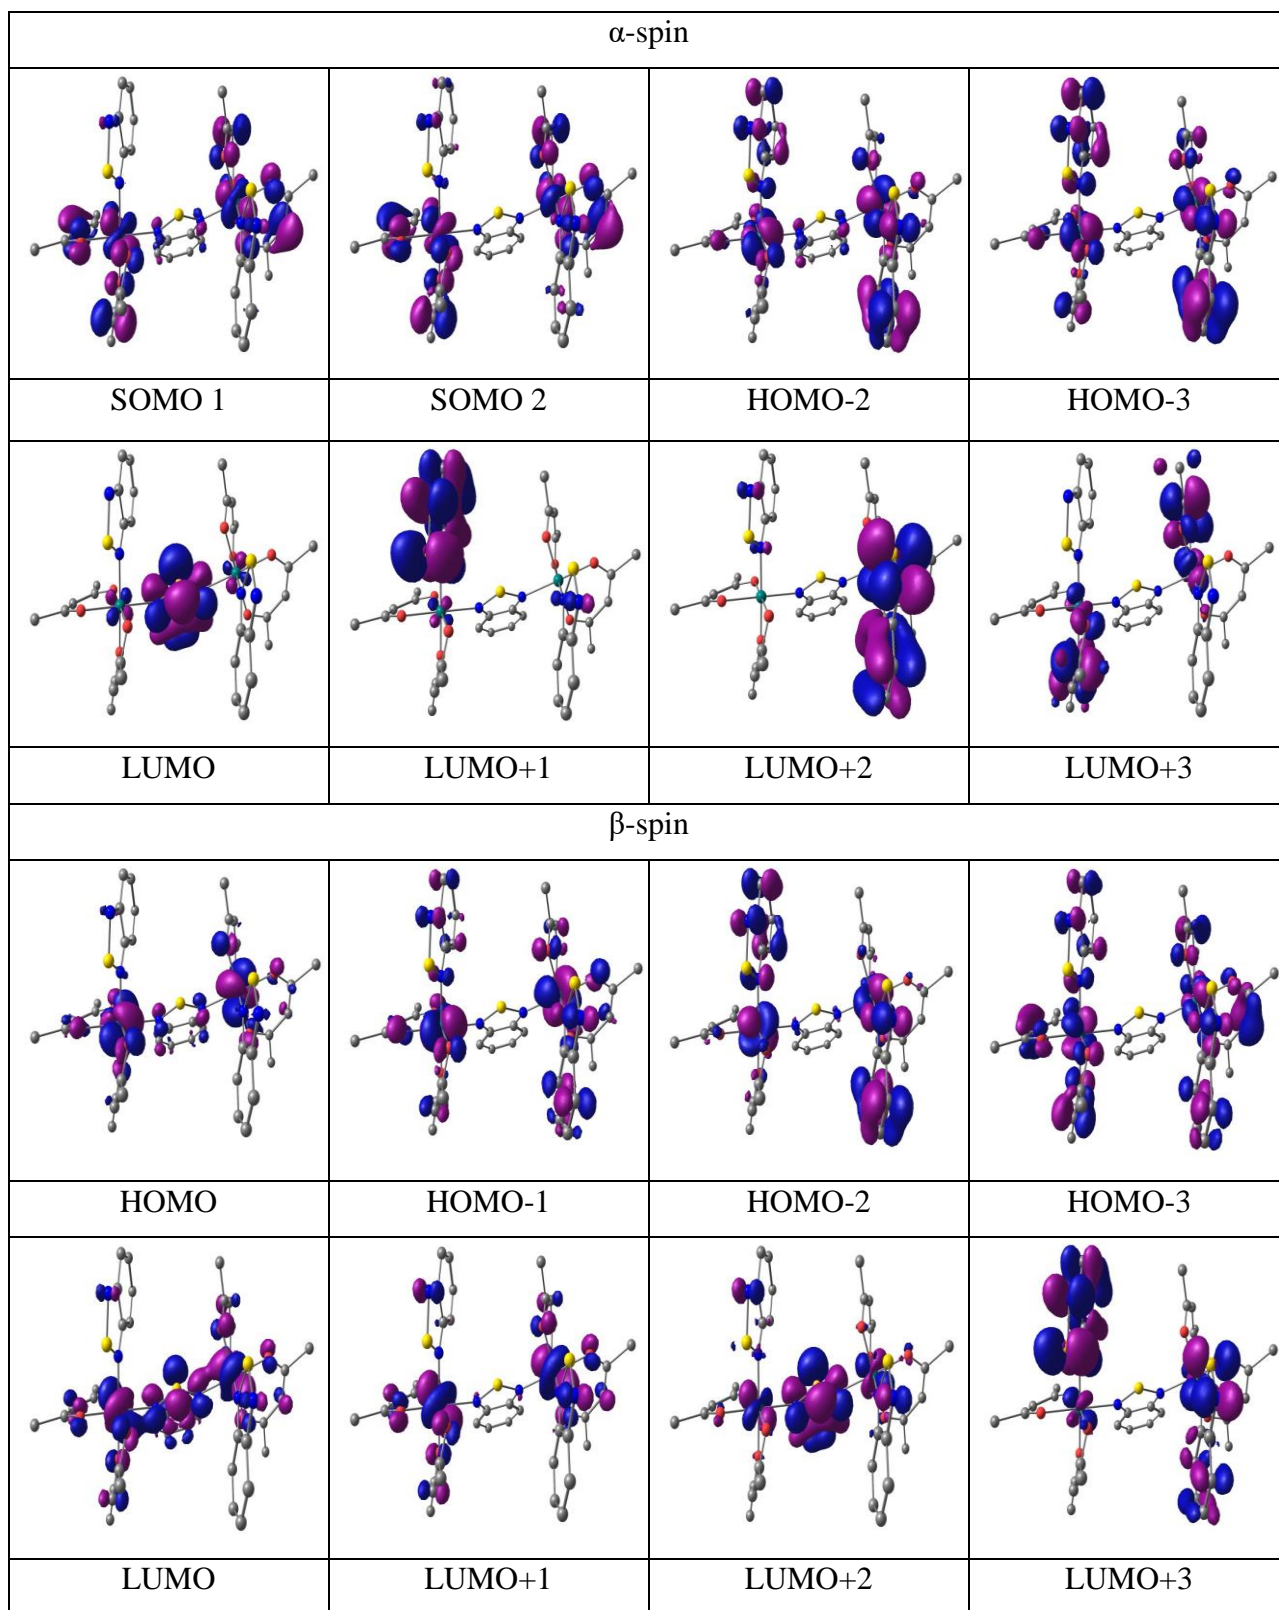

**Table S16** Composition and energies of selected molecular orbitals of **3<sup>+</sup>** (*S*=1/2)

| MO             | Energy (eV) | % Composition |      |     |
|----------------|-------------|---------------|------|-----|
|                |             | Ru            | acac | BTD |
| $\alpha$ -spin |             |               |      |     |
| LUMO+5         | -3.330      | 6             | 85   | 9   |
| LUMO+4         | -3.373      | 3             | 93   | 4   |
| LUMO+3         | -3.422      | 3             | 80   | 17  |
| LUMO+2         | -4.929      | 5             | 1    | 93  |
| LUMO+1         | -4.947      | 4             | 1    | 95  |
| LUMO           | -5.169      | 6             | 1    | 93  |
| SOMO           | -7.984      | 39            | 47   | 14  |
| HOMO-1         | -8.060      | 41            | 48   | 11  |
| HOMO-2         | -8.236      | 48            | 41   | 11  |
| HOMO-3         | -8.372      | 29            | 66   | 5   |
| HOMO-4         | -8.640      | 71            | 19   | 11  |
| HOMO-5         | -8.646      | 52            | 36   | 12  |
| $\beta$ -spin  |             |               |      |     |
| LUMO+5         | -3.357      | 3             | 93   | 4   |
| LUMO+4         | -3.413      | 3             | 78   | 19  |
| LUMO+3         | -4.773      | 18            | 4    | 78  |
| LUMO+2         | -4.875      | 9             | 2    | 89  |
| LUMO+1         | -5.157      | 12            | 3    | 85  |
| LUMO           | -6.243      | 64            | 18   | 18  |
| HOMO           | -7.423      | 42            | 25   | 33  |
| HOMO-1         | -8.019      | 54            | 36   | 10  |
| HOMO-2         | -8.046      | 54            | 36   | 10  |
| HOMO-3         | -8.436      | 73            | 18   | 9   |
| HOMO-4         | -8.468      | 71            | 18   | 10  |
| HOMO-5         | -8.549      | 16            | 72   | 11  |

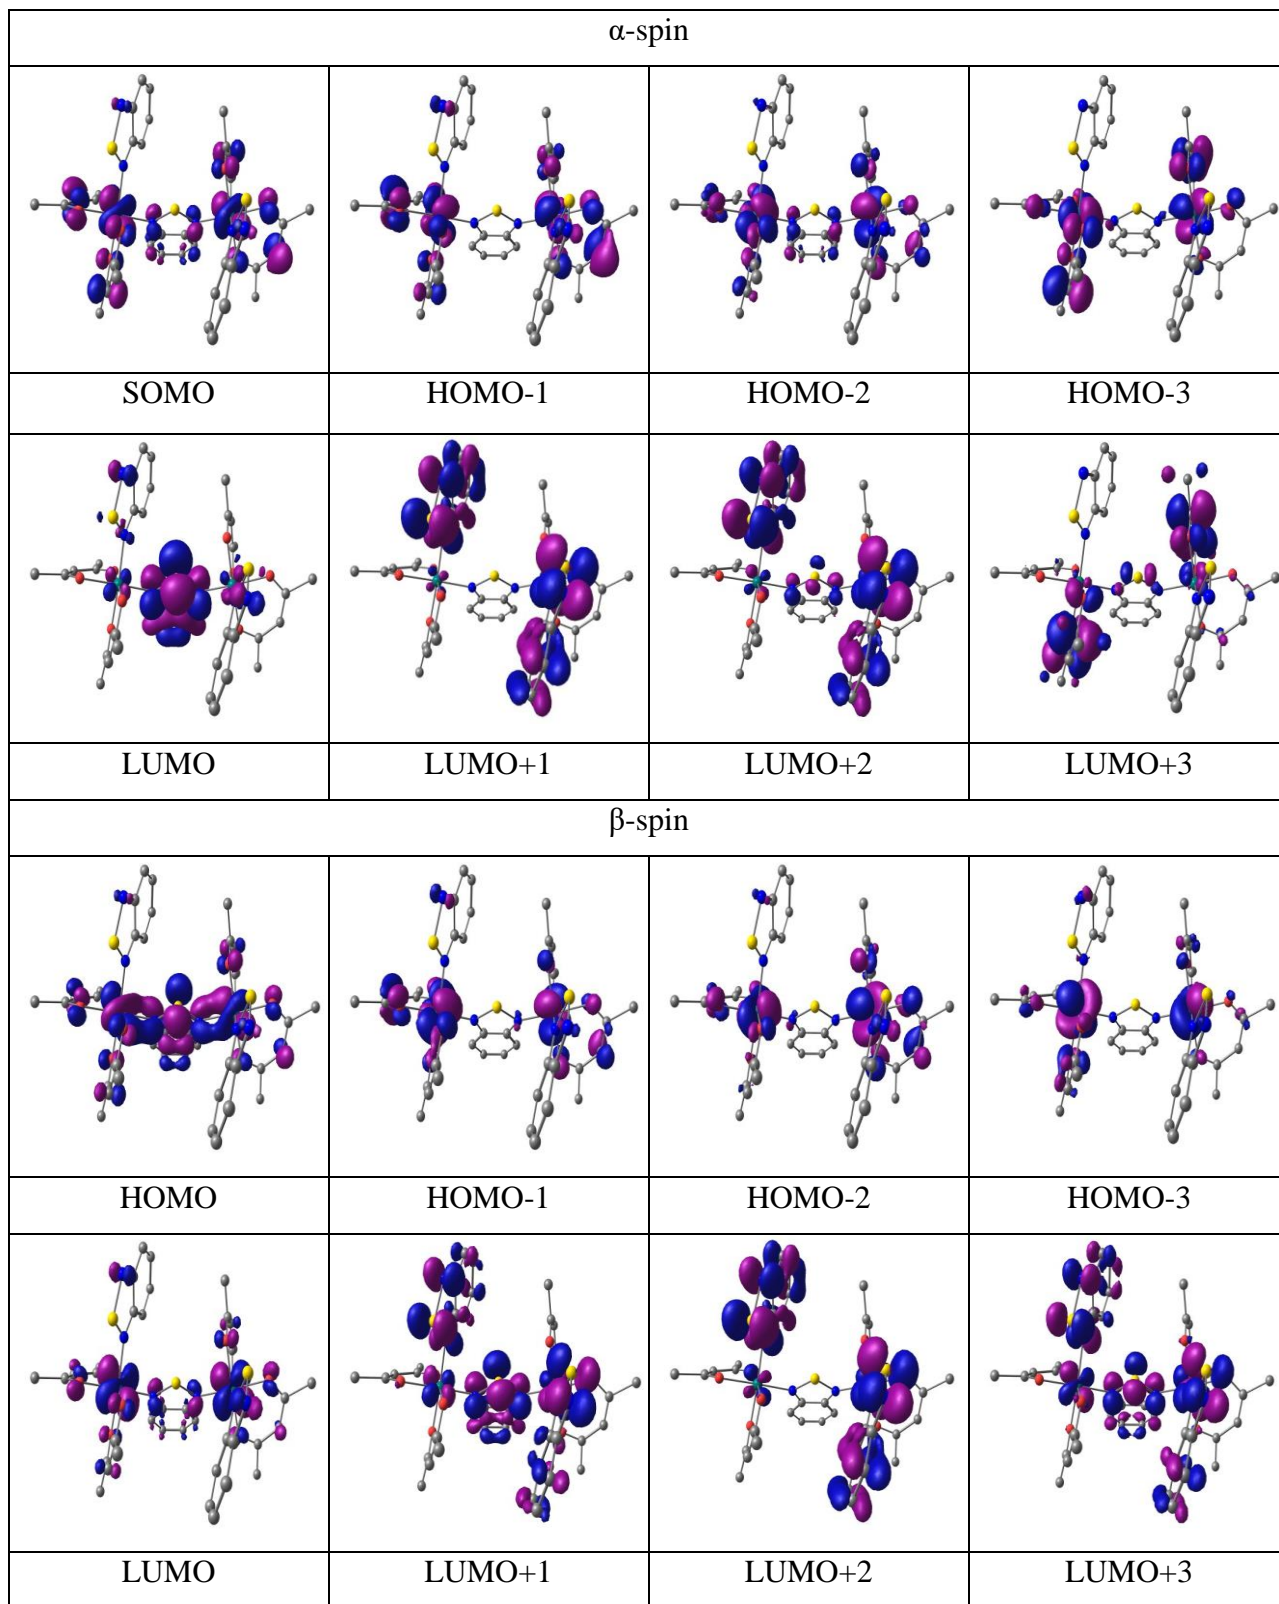

**Table S17** Composition and energies of selected molecular orbitals of **3** ( $S=0$ )

| MO     | Energy (eV) | % Composition |      |     |
|--------|-------------|---------------|------|-----|
|        |             | Ru            | acac | BTD |
| LUMO+5 | -0.887      | 11            | 72   | 17  |
| LUMO+4 | -1.033      | 19            | 65   | 16  |
| LUMO+3 | -1.235      | 44            | 40   | 16  |
| LUMO+2 | -1.809      | 3             | 9    | 88  |
| LUMO+1 | -2.432      | 4             | 3    | 94  |
| LUMO   | -2.569      | 3             | 4    | 93  |
| HOMO   | -4.588      | 65            | 21   | 14  |
| HOMO-1 | -4.600      | 66            | 18   | 15  |
| HOMO-2 | -4.712      | 72            | 17   | 11  |
| HOMO-3 | -4.935      | 72            | 21   | 6   |
| HOMO-4 | -5.075      | 73            | 21   | 6   |
| HOMO-5 | -5.443      | 75            | 16   | 10  |

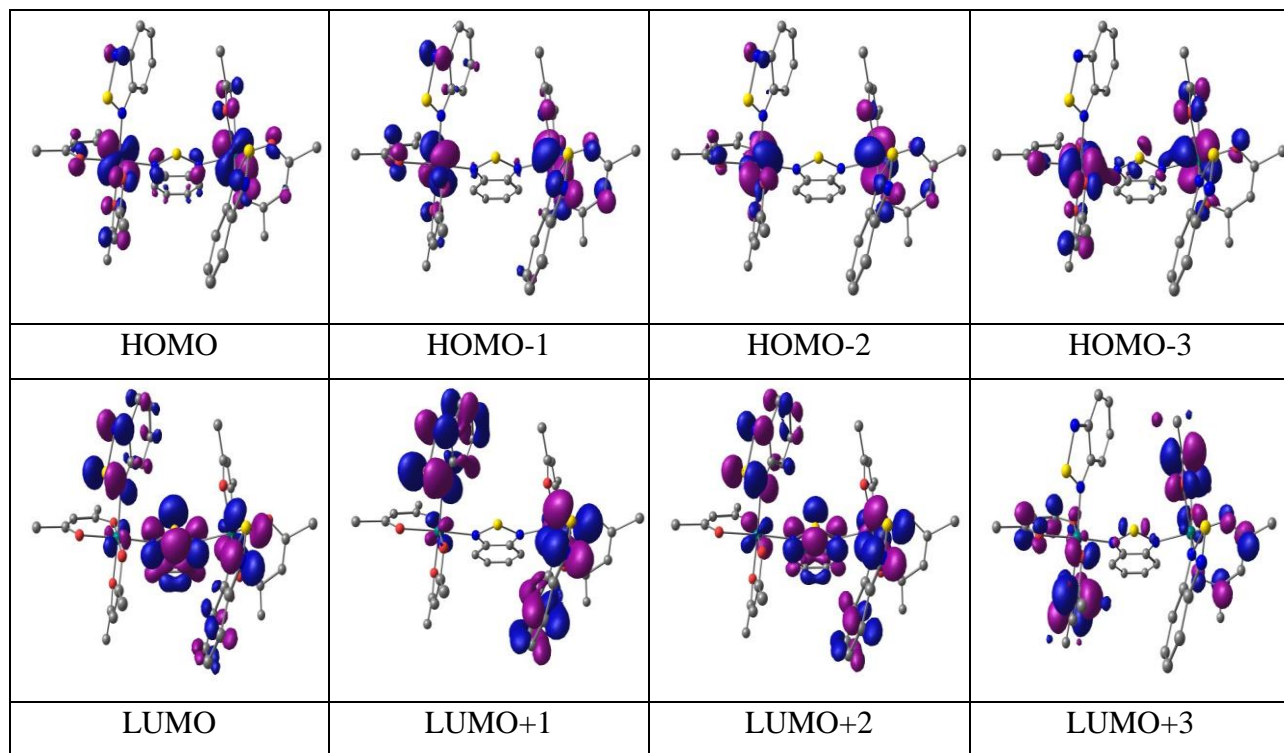



**Table S18** Composition and energies of selected molecular orbitals of **3<sup>-</sup>** (*S*=1/2)

| MO             | Energy (eV) | % Composition |      |     |
|----------------|-------------|---------------|------|-----|
|                |             | Ru            | acac | BTD |
| $\alpha$ -spin |             |               |      |     |
| LUMO+5         | 1.776       | 5             | 91   | 4   |
| LUMO+4         | 1.749       | 5             | 86   | 9   |
| LUMO+3         | 1.624       | 3             | 93   | 4   |
| LUMO+2         | 1.622       | 3             | 93   | 4   |
| LUMO+1         | 0.483       | 17            | 4    | 79  |
| LUMO           | 0.251       | 11            | 3    | 86  |
| SOMO           | -0.391      | 6             | 2    | 93  |
| HOMO-1         | -1.805      | 62            | 16   | 22  |
| HOMO-2         | -2.191      | 60            | 20   | 21  |
| HOMO-3         | -2.353      | 72            | 18   | 11  |
| HOMO-4         | -2.448      | 72            | 19   | 8   |
| HOMO-5         | -2.607      | 73            | 16   | 11  |
| $\beta$ -spin  |             |               |      |     |
| LUMO+5         | 1.750       | 5             | 86   | 9   |
| LUMO+4         | 1.626       | 3             | 92   | 4   |
| LUMO+3         | 1.625       | 3             | 93   | 4   |
| LUMO+2         | 0.954       | 10            | 3    | 86  |
| LUMO+1         | 0.650       | 6             | 2    | 92  |
| LUMO           | 0.623       | 5             | 2    | 94  |
| HOMO           | -1.871      | 64            | 16   | 20  |
| HOMO-1         | -2.243      | 64            | 20   | 15  |
| HOMO-2         | -2.320      | 70            | 18   | 12  |
| HOMO-3         | -2.423      | 71            | 22   | 7   |
| HOMO-4         | -2.619      | 75            | 15   | 10  |
| HOMO-5         | -2.636      | 77            | 14   | 9   |

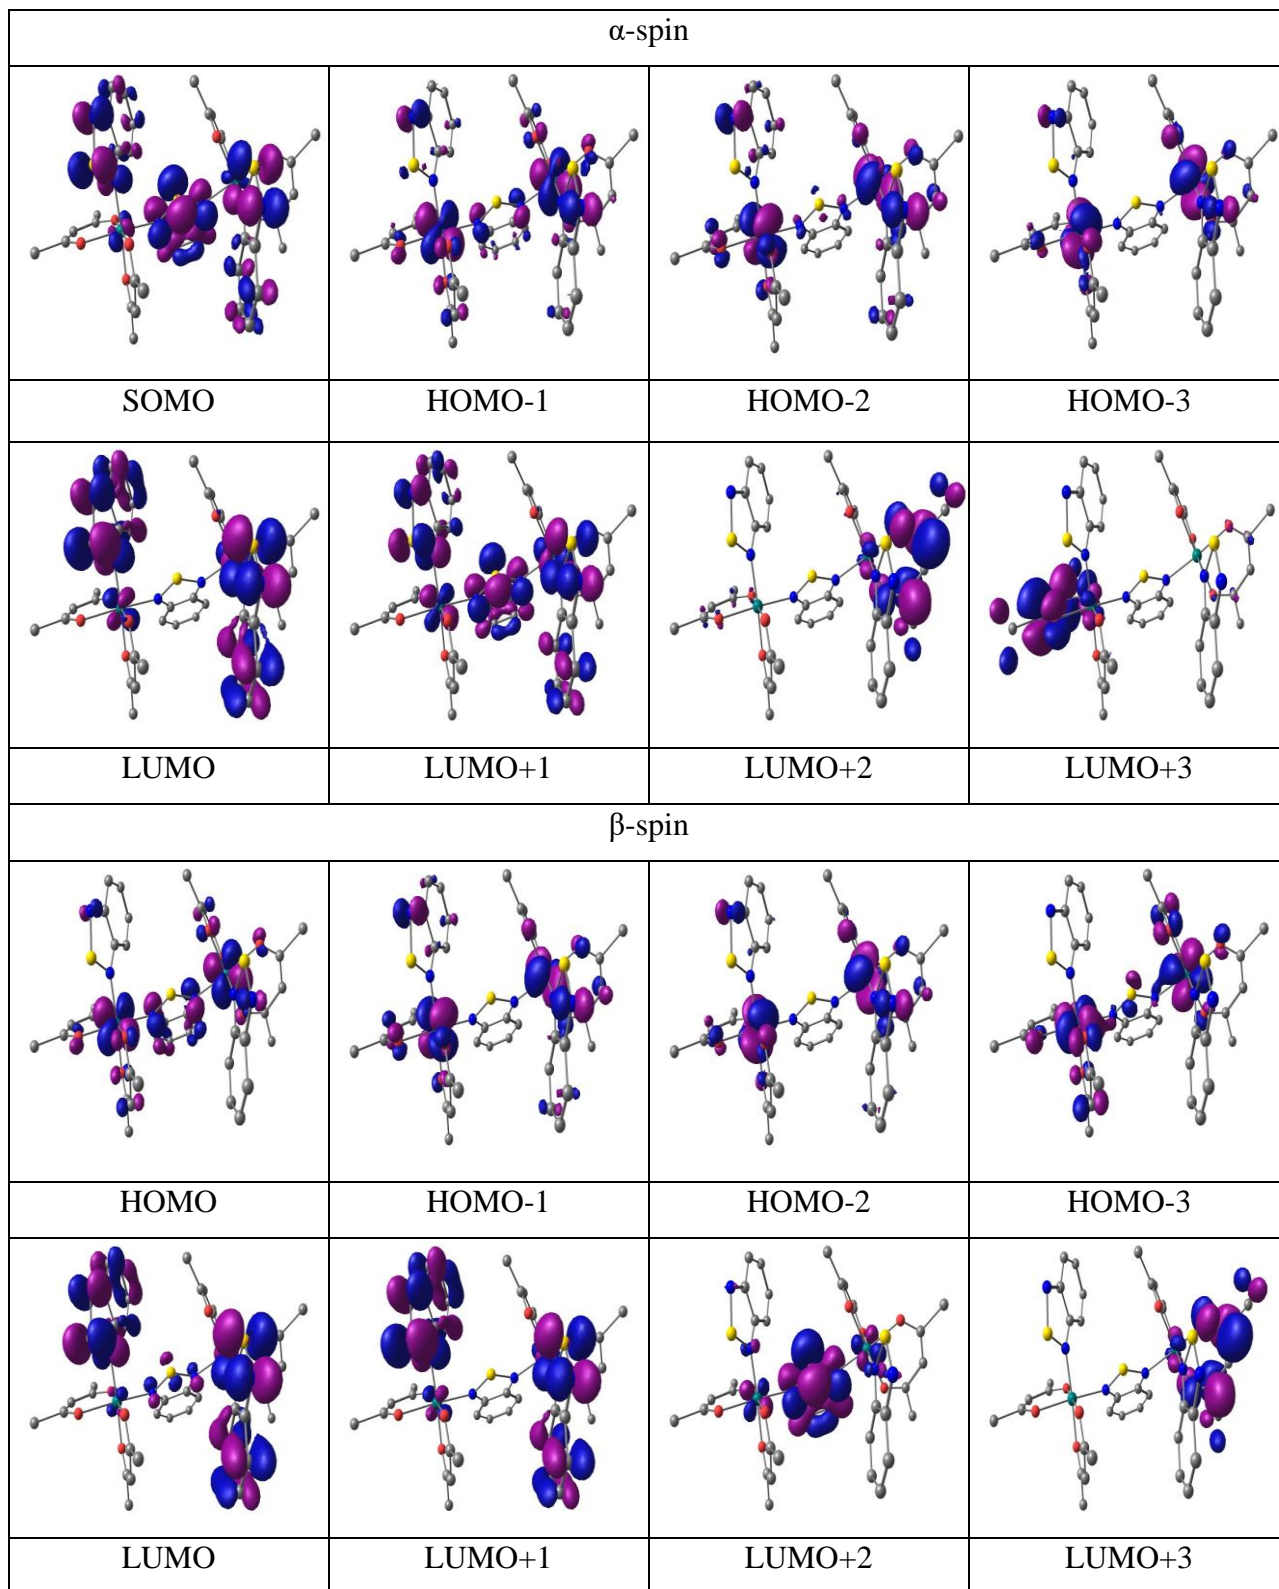



**Table S19** Composition and energies of selected molecular orbitals of  $3^{2-}$  ( $S=1$ )

| MO             | Energy (eV) | % Composition |      |     |
|----------------|-------------|---------------|------|-----|
|                |             | Ru            | acac | BTD |
| $\alpha$ -spin |             |               |      |     |
| LUMO+5         | 5.195       | 67            | 28   | 5   |
| LUMO+4         | 4.157       | 5             | 92   | 3   |
| LUMO+3         | 4.129       | 7             | 86   | 7   |
| LUMO+2         | 3.915       | 4             | 92   | 4   |
| LUMO+1         | 3.909       | 4             | 92   | 4   |
| LUMO           | 2.960       | 15            | 4    | 81  |
| SOMO 1         | 2.387       | 9             | 3    | 88  |
| SOMO 2         | 2.153       | 6             | 2    | 92  |
| HOMO-2         | 0.732       | 66            | 15   | 19  |
| HOMO-3         | 0.367       | 64            | 17   | 19  |
| HOMO-4         | 0.254       | 73            | 16   | 11  |
| HOMO-5         | 0.134       | 75            | 14   | 8   |
| $\beta$ -spin  |             |               |      |     |
| LUMO+5         | 4.139       | 7             | 86   | 7   |
| LUMO+4         | 3.929       | 5             | 83   | 12  |
| LUMO+3         | 3.917       | 4             | 91   | 5   |
| LUMO+2         | 3.842       | 6             | 15   | 79  |
| LUMO+1         | 3.821       | 5             | 9    | 87  |
| LUMO           | 3.444       | 8             | 5    | 87  |
| HOMO           | 0.810       | 66            | 14   | 20  |
| HOMO-1         | 0.500       | 64            | 15   | 20  |
| HOMO-2         | 0.369       | 71            | 15   | 14  |
| HOMO-3         | 0.181       | 73            | 19   | 8   |
| HOMO-4         | 0.049       | 75            | 15   | 10  |
| HOMO-5         | 0.023       | 76            | 14   | 9   |

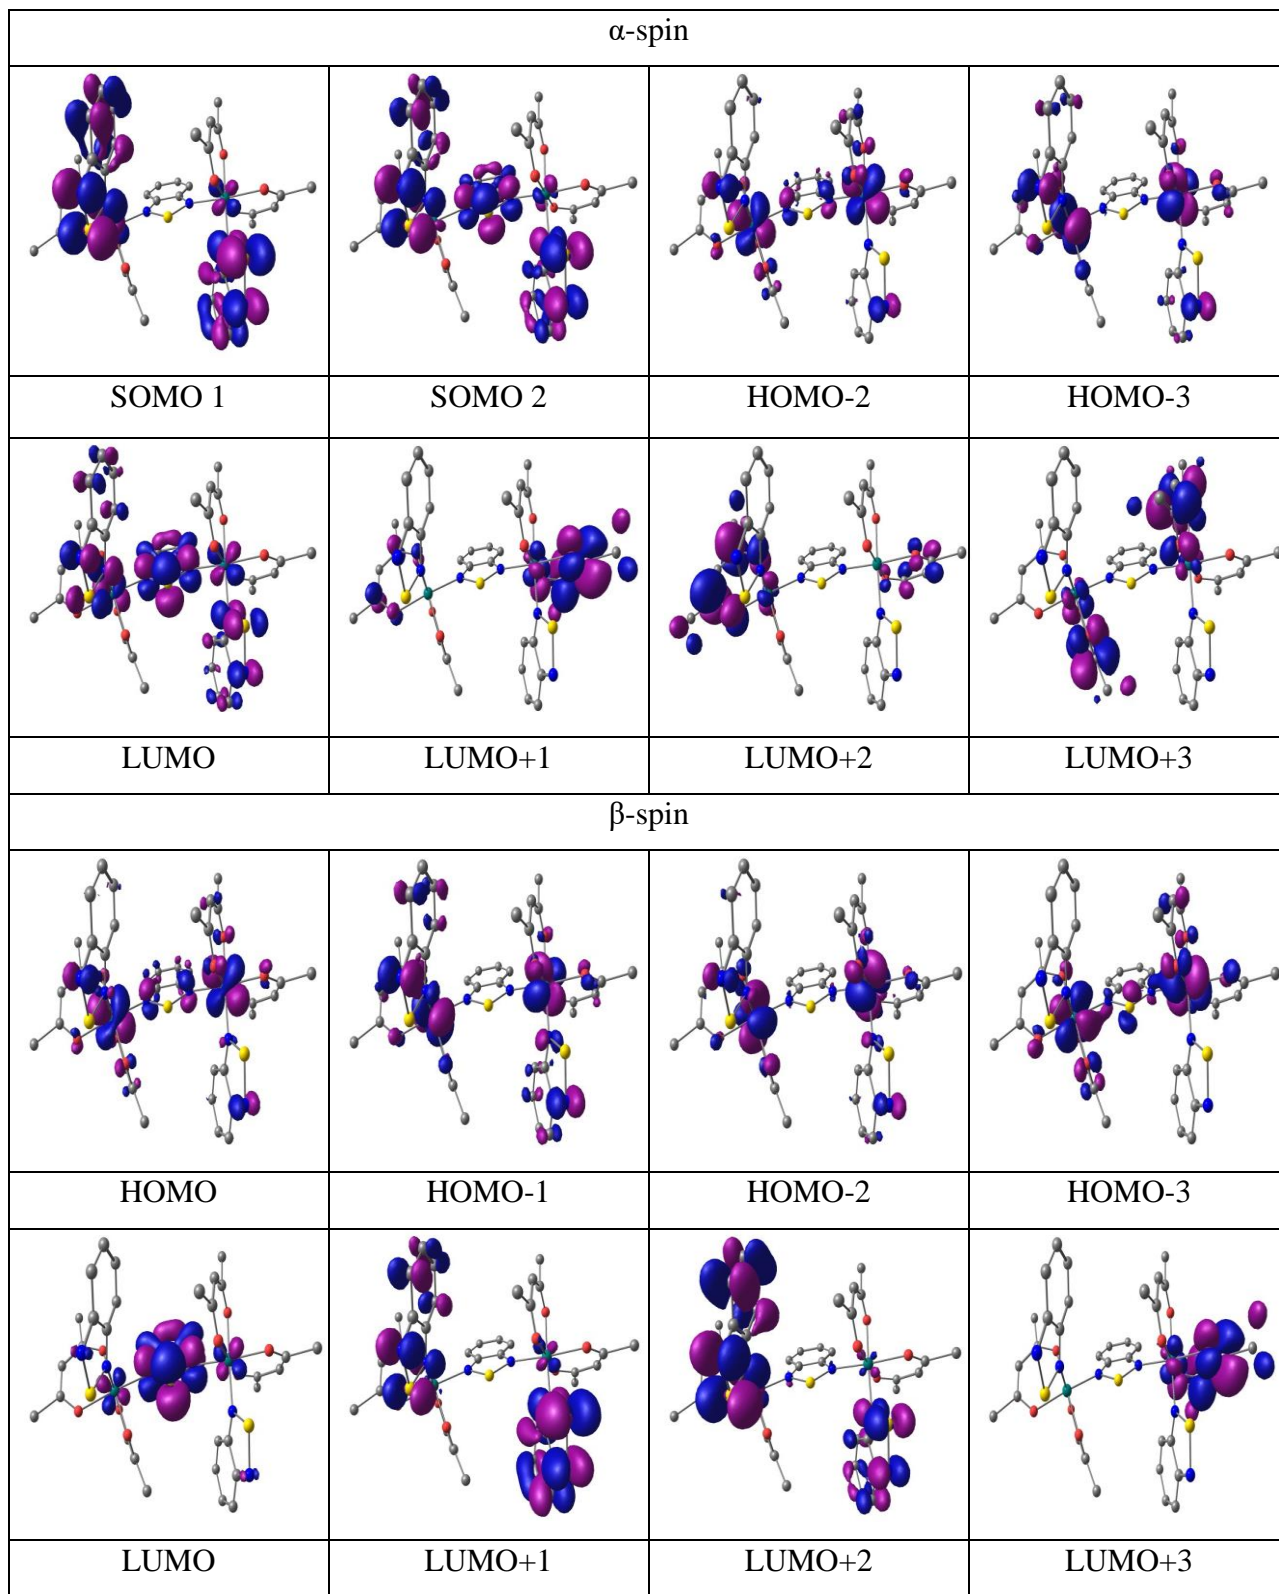

**Table S20** Composition and energies of selected molecular orbitals of  $4^{3+}$  ( $S=3/2$ )

| MO             | Energy (eV) | % Composition |      |     |
|----------------|-------------|---------------|------|-----|
|                |             | Ru            | acac | BTD |
| $\alpha$ -spin |             |               |      |     |
| LUMO+5         | -7.838      | 32            | 42   | 27  |
| LUMO+4         | -7.909      | 42            | 21   | 38  |
| LUMO+3         | -9.050      | 3             | 1    | 96  |
| LUMO+2         | -9.197      | 3             | 1    | 96  |
| LUMO+1         | -9.769      | 8             | 2    | 90  |
| LUMO           | -9.851      | 6             | 2    | 92  |
| SOMO           | -12.328     | 22            | 70   | 8   |
| HOMO-1         | -12.497     | 24            | 64   | 12  |
| HOMO-2         | -12.513     | 17            | 76   | 6   |
| HOMO-3         | -12.641     | 22            | 70   | 8   |
| HOMO-4         | -12.710     | 17            | 77   | 6   |
| HOMO-5         | -12.800     | 21            | 73   | 7   |
| $\beta$ -spin  |             |               |      |     |
| LUMO+5         | -8.979      | 13            | 3    | 83  |
| LUMO+4         | -9.406      | 23            | 5    | 72  |
| LUMO+3         | -9.686      | 14            | 4    | 82  |
| LUMO+2         | -10.366     | 60            | 22   | 18  |
| LUMO+1         | -10.585     | 49            | 22   | 30  |
| LUMO           | -10.975     | 44            | 24   | 31  |
| HOMO           | -12.218     | 25            | 69   | 6   |
| HOMO-1         | -12.410     | 26            | 67   | 6   |
| HOMO-2         | -12.536     | 26            | 68   | 6   |
| HOMO-3         | -12.567     | 24            | 64   | 11  |
| HOMO-4         | -12.676     | 32            | 50   | 18  |
| HOMO-5         | -12.796     | 42            | 44   | 15  |

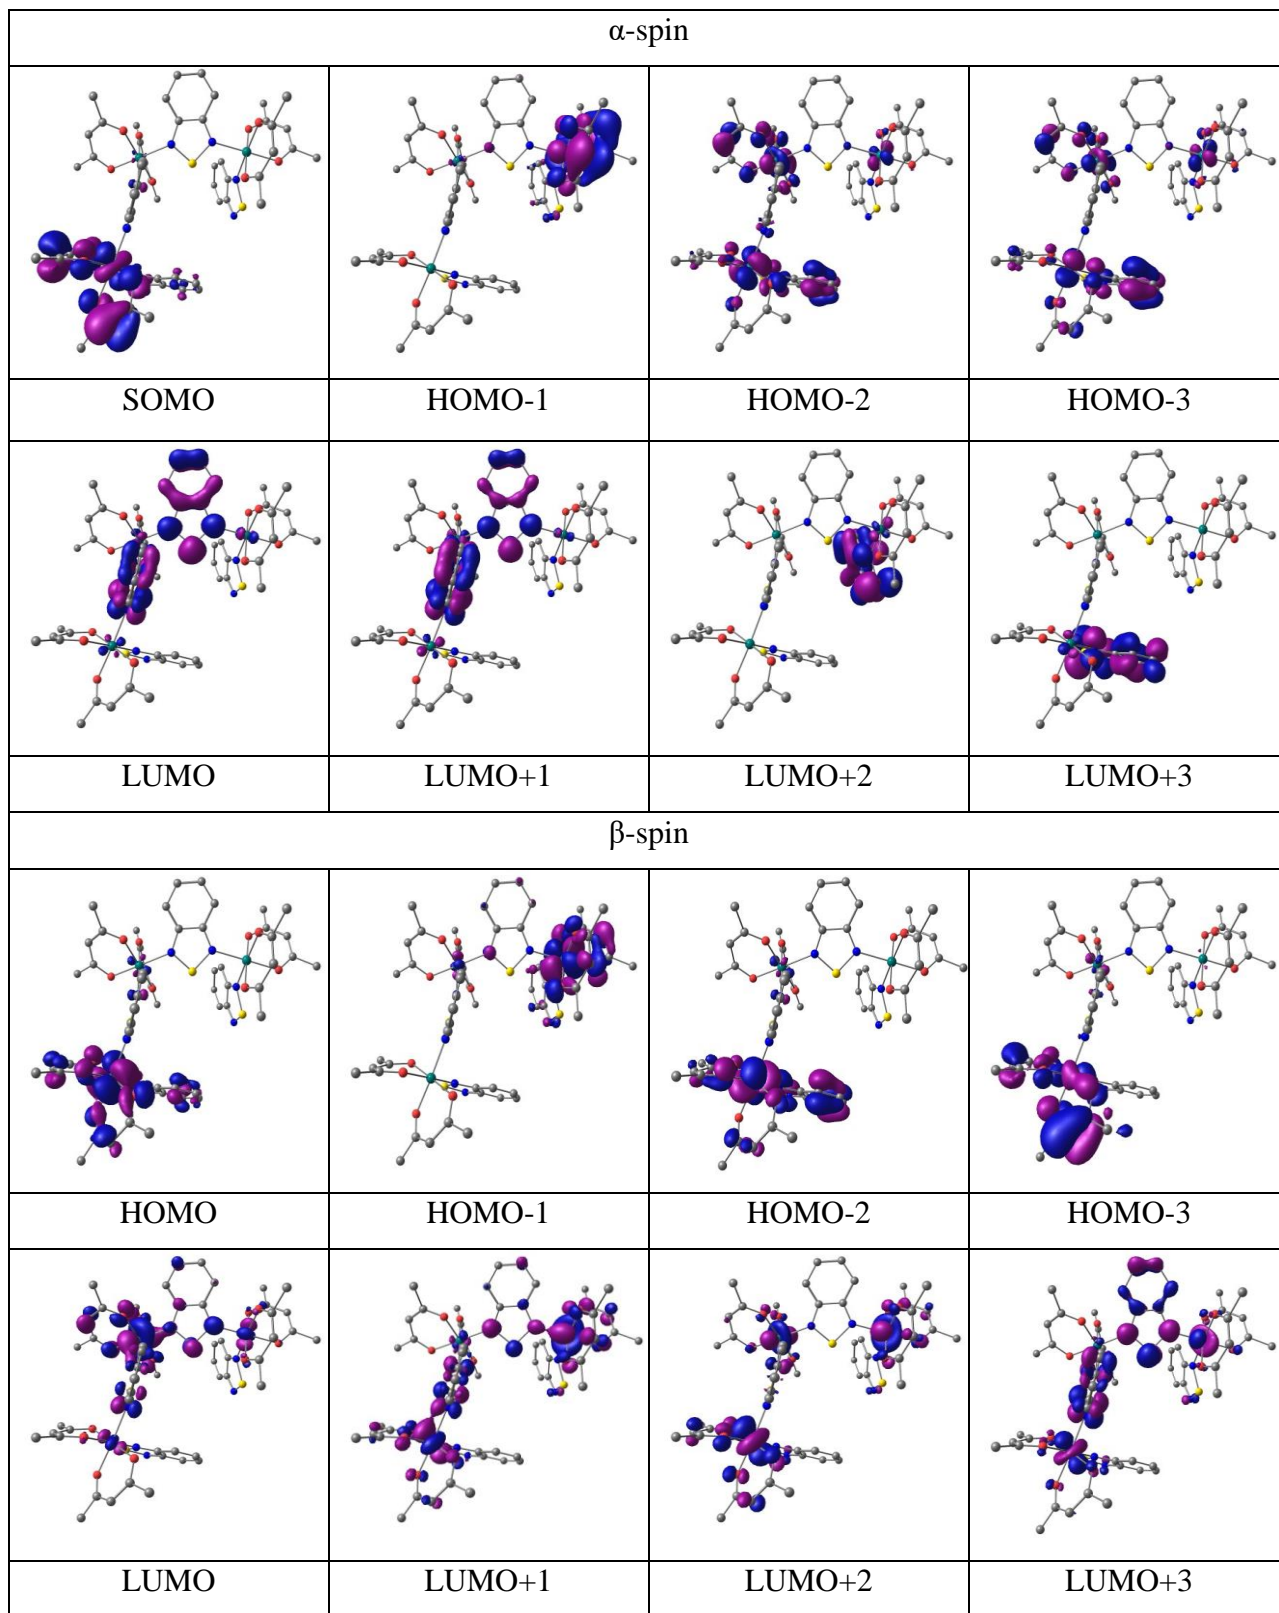

**Table S21** Composition and energies of selected molecular orbitals of  $4^{2+}$  ( $S=1$ )

| MO             | Energy (eV) | % Composition |      |     |
|----------------|-------------|---------------|------|-----|
|                |             | Ru            | acac | BTD |
| $\alpha$ -spin |             |               |      |     |
| LUMO+5         | -5.329      | 33            | 41   | 25  |
| LUMO+4         | -5.461      | 4             | 82   | 14  |
| LUMO+3         | -6.897      | 3             | 1    | 96  |
| LUMO+2         | -6.993      | 4             | 1    | 95  |
| LUMO+1         | -7.136      | 9             | 2    | 89  |
| LUMO           | -7.271      | 6             | 2    | 92  |
| SOMO 1         | -9.758      | 36            | 51   | 12  |
| SOMO 2         | -9.965      | 43            | 48   | 9   |
| HOMO-2         | -10.196     | 24            | 66   | 10  |
| HOMO-3         | -10.198     | 24            | 66   | 10  |
| HOMO-4         | -10.323     | 31            | 61   | 8   |
| HOMO-5         | -10.369     | 56            | 33   | 11  |
| $\beta$ -spin  |             |               |      |     |
| LUMO+5         | -6.725      | 16            | 3    | 81  |
| LUMO+4         | -6.779      | 19            | 4    | 77  |
| LUMO+3         | -6.995      | 15            | 3    | 82  |
| LUMO+2         | -7.209      | 12            | 3    | 85  |
| LUMO+1         | -8.120      | 63            | 19   | 19  |
| LUMO           | -8.386      | 53            | 19   | 28  |
| HOMO           | -9.393      | 39            | 31   | 30  |
| HOMO-1         | -9.766      | 51            | 38   | 11  |
| HOMO-2         | -10.101     | 38            | 54   | 7   |
| HOMO-3         | -10.138     | 44            | 48   | 8   |
| HOMO-4         | -10.255     | 66            | 27   | 7   |
| HOMO-5         | -10.337     | 27            | 64   | 9   |

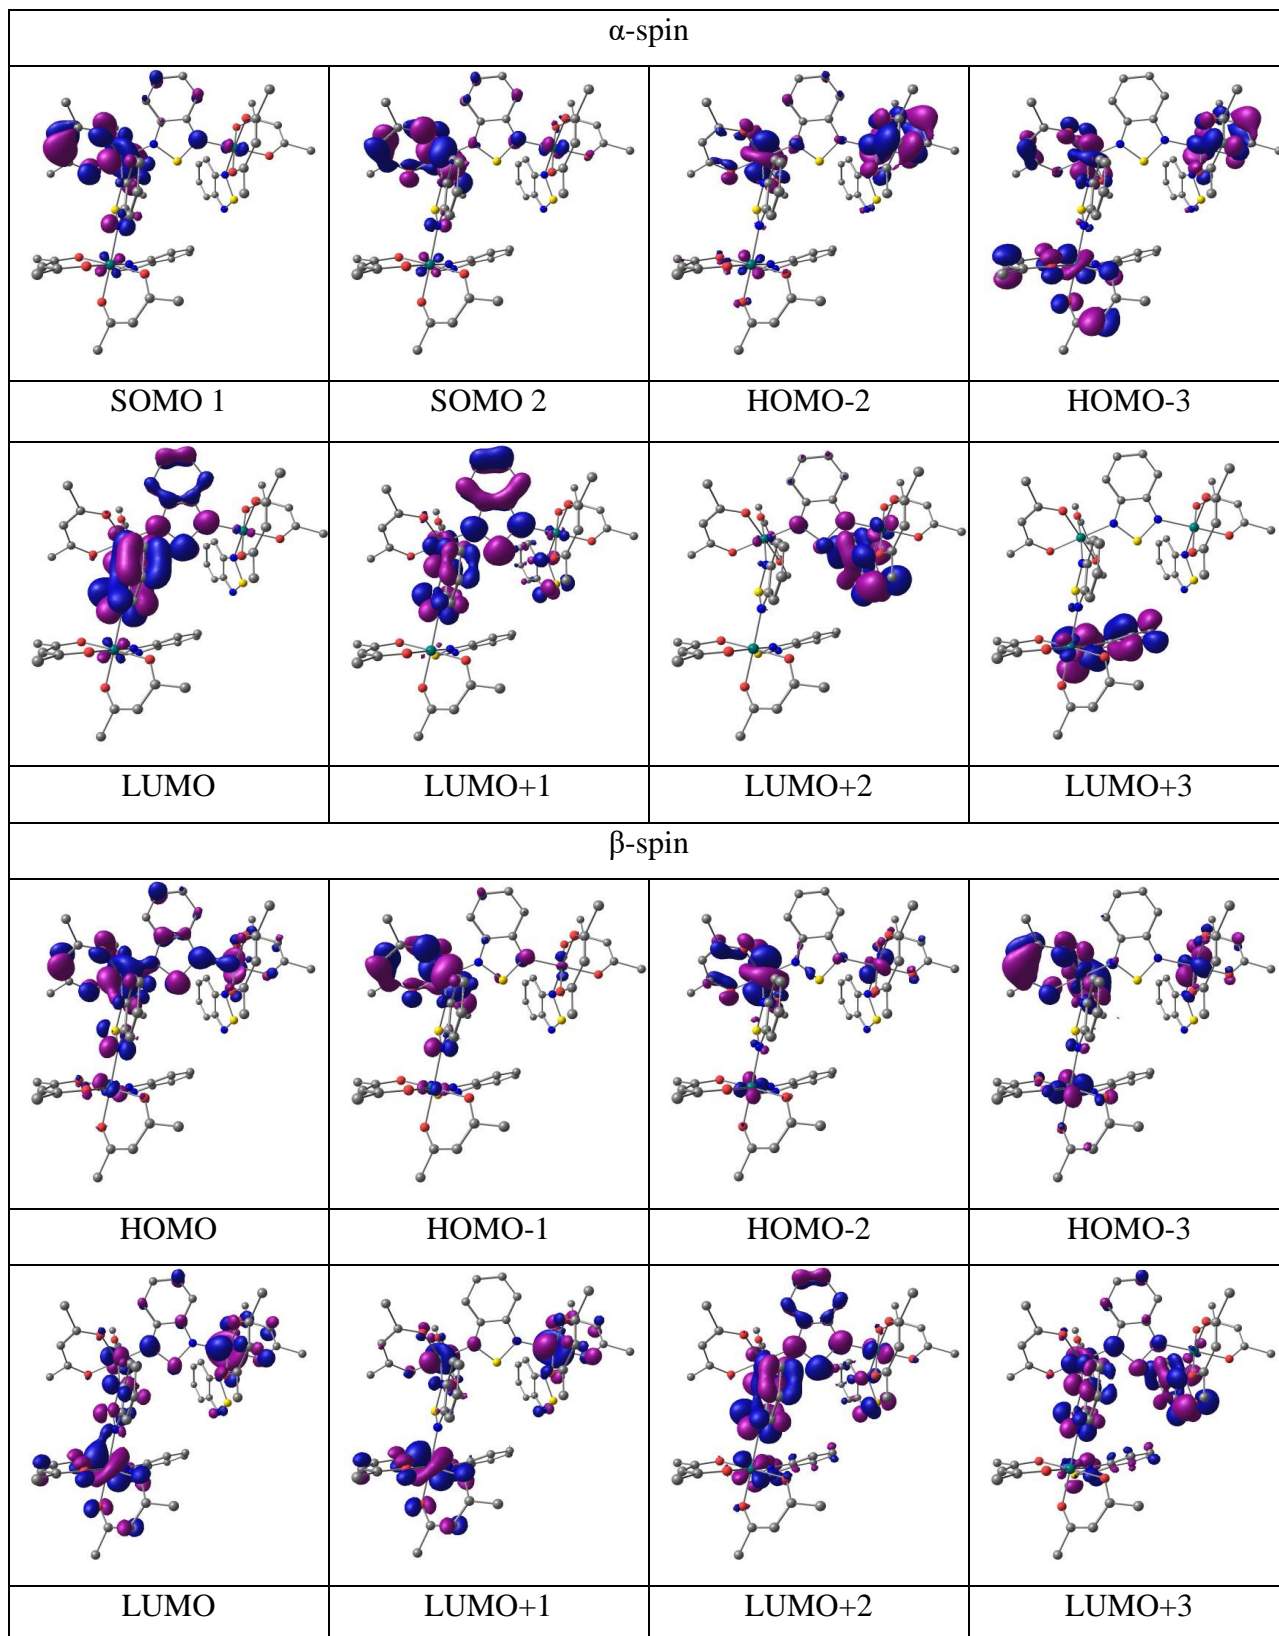

**Table S22** Composition and energies of selected molecular orbitals of **4<sup>+</sup>** (*S*=1/2)

| MO             | Energy (eV) | % Composition |      |     |
|----------------|-------------|---------------|------|-----|
|                |             | Ru            | acac | BTD |
| $\alpha$ -spin |             |               |      |     |
| LUMO+5         | -3.167      | 3             | 89   | 9   |
| LUMO+4         | -3.207      | 4             | 84   | 13  |
| LUMO+3         | -4.511      | 7             | 2    | 91  |
| LUMO+2         | -4.528      | 5             | 1    | 93  |
| LUMO+1         | -4.776      | 9             | 2    | 89  |
| LUMO           | -4.872      | 7             | 2    | 91  |
| SOMO           | -7.262      | 49            | 35   | 16  |
| HOMO-1         | -7.503      | 57            | 31   | 12  |
| HOMO-2         | -7.536      | 49            | 38   | 13  |
| HOMO-3         | -7.739      | 52            | 37   | 11  |
| HOMO-4         | -7.813      | 73            | 18   | 9   |
| HOMO-5         | -7.974      | 33            | 58   | 9   |
| $\beta$ -spin  |             |               |      |     |
| LUMO+5         | -3.193      | 3             | 84   | 13  |
| LUMO+4         | -4.444      | 15            | 3    | 81  |
| LUMO+3         | -4.456      | 11            | 2    | 86  |
| LUMO+2         | -4.660      | 17            | 4    | 79  |
| LUMO+1         | -4.917      | 14            | 3    | 82  |
| LUMO           | -5.967      | 66            | 17   | 16  |
| HOMO           | -6.831      | 51            | 22   | 28  |
| HOMO-1         | -7.206      | 45            | 28   | 27  |
| HOMO-2         | -7.399      | 60            | 27   | 13  |
| HOMO-3         | -7.554      | 58            | 31   | 11  |
| HOMO-4         | -7.725      | 74            | 17   | 9   |
| HOMO-5         | -7.871      | 58            | 33   | 9   |



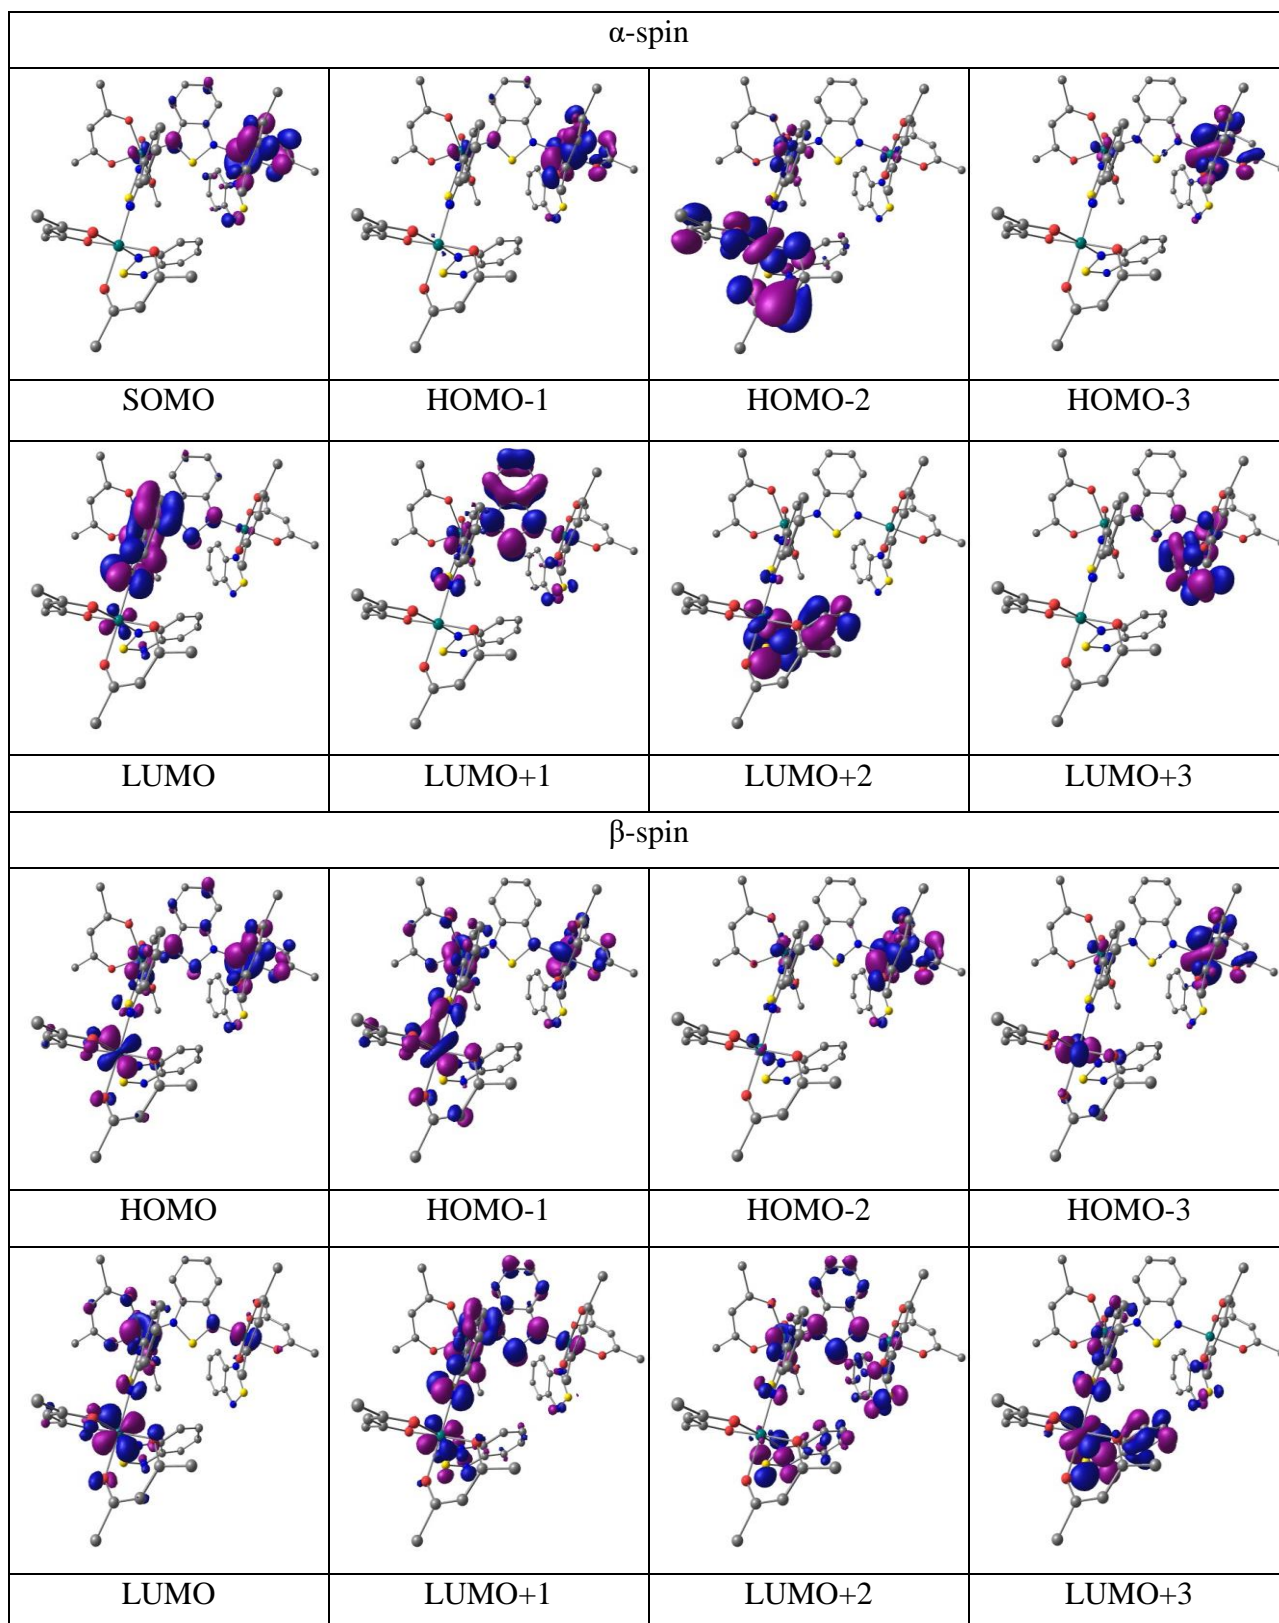



**Table S23** Composition and energies of selected molecularo of **4** ( $S=0$ )

| MO     | Energy (eV) | % Composition |      |     |
|--------|-------------|---------------|------|-----|
|        |             | Ru            | acac | BTD |
| LUMO+5 | -0.733      | 4             | 86   | 10  |
| LUMO+4 | -0.770      | 3             | 94   | 4   |
| LUMO+3 | -2.097      | 13            | 3    | 84  |
| LUMO+2 | -2.199      | 12            | 3    | 85  |
| LUMO+1 | -2.305      | 10            | 3    | 87  |
| LUMO   | -2.444      | 7             | 2    | 91  |
| HOMO   | -4.452      | 65            | 20   | 15  |
| HOMO-1 | -4.683      | 64            | 20   | 16  |
| HOMO-2 | -4.912      | 64            | 22   | 14  |
| HOMO-3 | -4.961      | 64            | 23   | 13  |
| HOMO-4 | -5.087      | 62            | 26   | 11  |
| HOMO-5 | -5.118      | 64            | 25   | 11  |

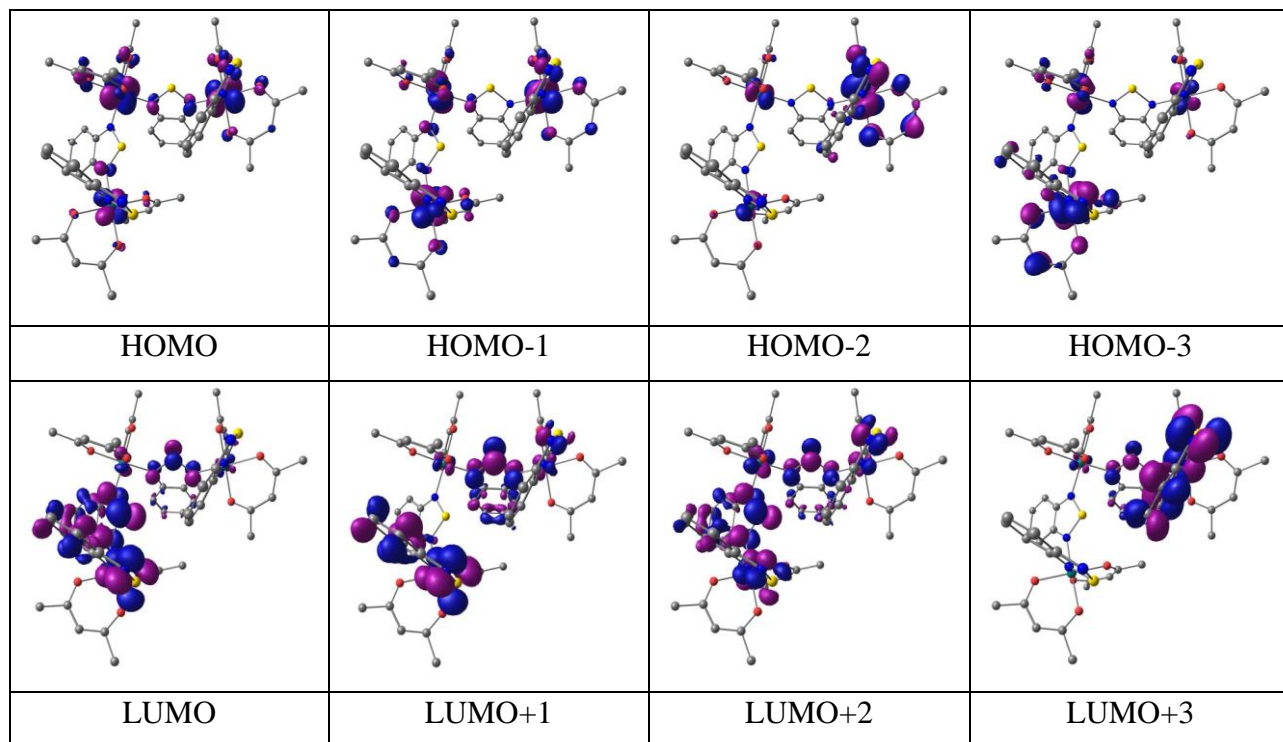

**Table S24** Composition and energies of selected molecular orbitals of **4<sup>-</sup>** (*S*=1/2)

| MO             | Energy (eV) | % Composition |      |     |
|----------------|-------------|---------------|------|-----|
|                |             | Ru            | acac | BTD |
| $\alpha$ -spin |             |               |      |     |
| LUMO+5         | 1.355       | 3             | 92   | 5   |
| LUMO+4         | 1.353       | 5             | 87   | 8   |
| LUMO+3         | 1.296       | 2             | 94   | 3   |
| LUMO+2         | 0.222       | 18            | 4    | 78  |
| LUMO+1         | 0.053       | 13            | 3    | 85  |
| LUMO           | -0.087      | 10            | 3    | 87  |
| SOMO           | -0.666      | 7             | 2    | 91  |
| HOMO-1         | -2.011      | 64            | 16   | 20  |
| HOMO-2         | -2.327      | 64            | 18   | 18  |
| HOMO-3         | -2.565      | 62            | 20   | 18  |
| HOMO-4         | -2.659      | 66            | 20   | 14  |
| HOMO-5         | -2.700      | 74            | 19   | 8   |
| $\beta$ -spin  |             |               |      |     |
| LUMO+5         | 1.353       | 5             | 87   | 8   |
| LUMO+4         | 1.298       | 2             | 94   | 3   |
| LUMO+3         | 0.607       | 11            | 3    | 86  |
| LUMO+2         | 0.417       | 10            | 3    | 87  |
| LUMO+1         | 0.271       | 6             | 2    | 93  |
| LUMO           | 0.096       | 6             | 2    | 92  |
| HOMO           | -2.103      | 65            | 16   | 19  |
| HOMO-1         | -2.318      | 67            | 17   | 16  |
| HOMO-2         | -2.579      | 65            | 20   | 15  |
| HOMO-3         | -2.657      | 66            | 20   | 14  |
| HOMO-4         | -2.688      | 71            | 22   | 8   |
| HOMO-5         | -2.750      | 73            | 19   | 8   |

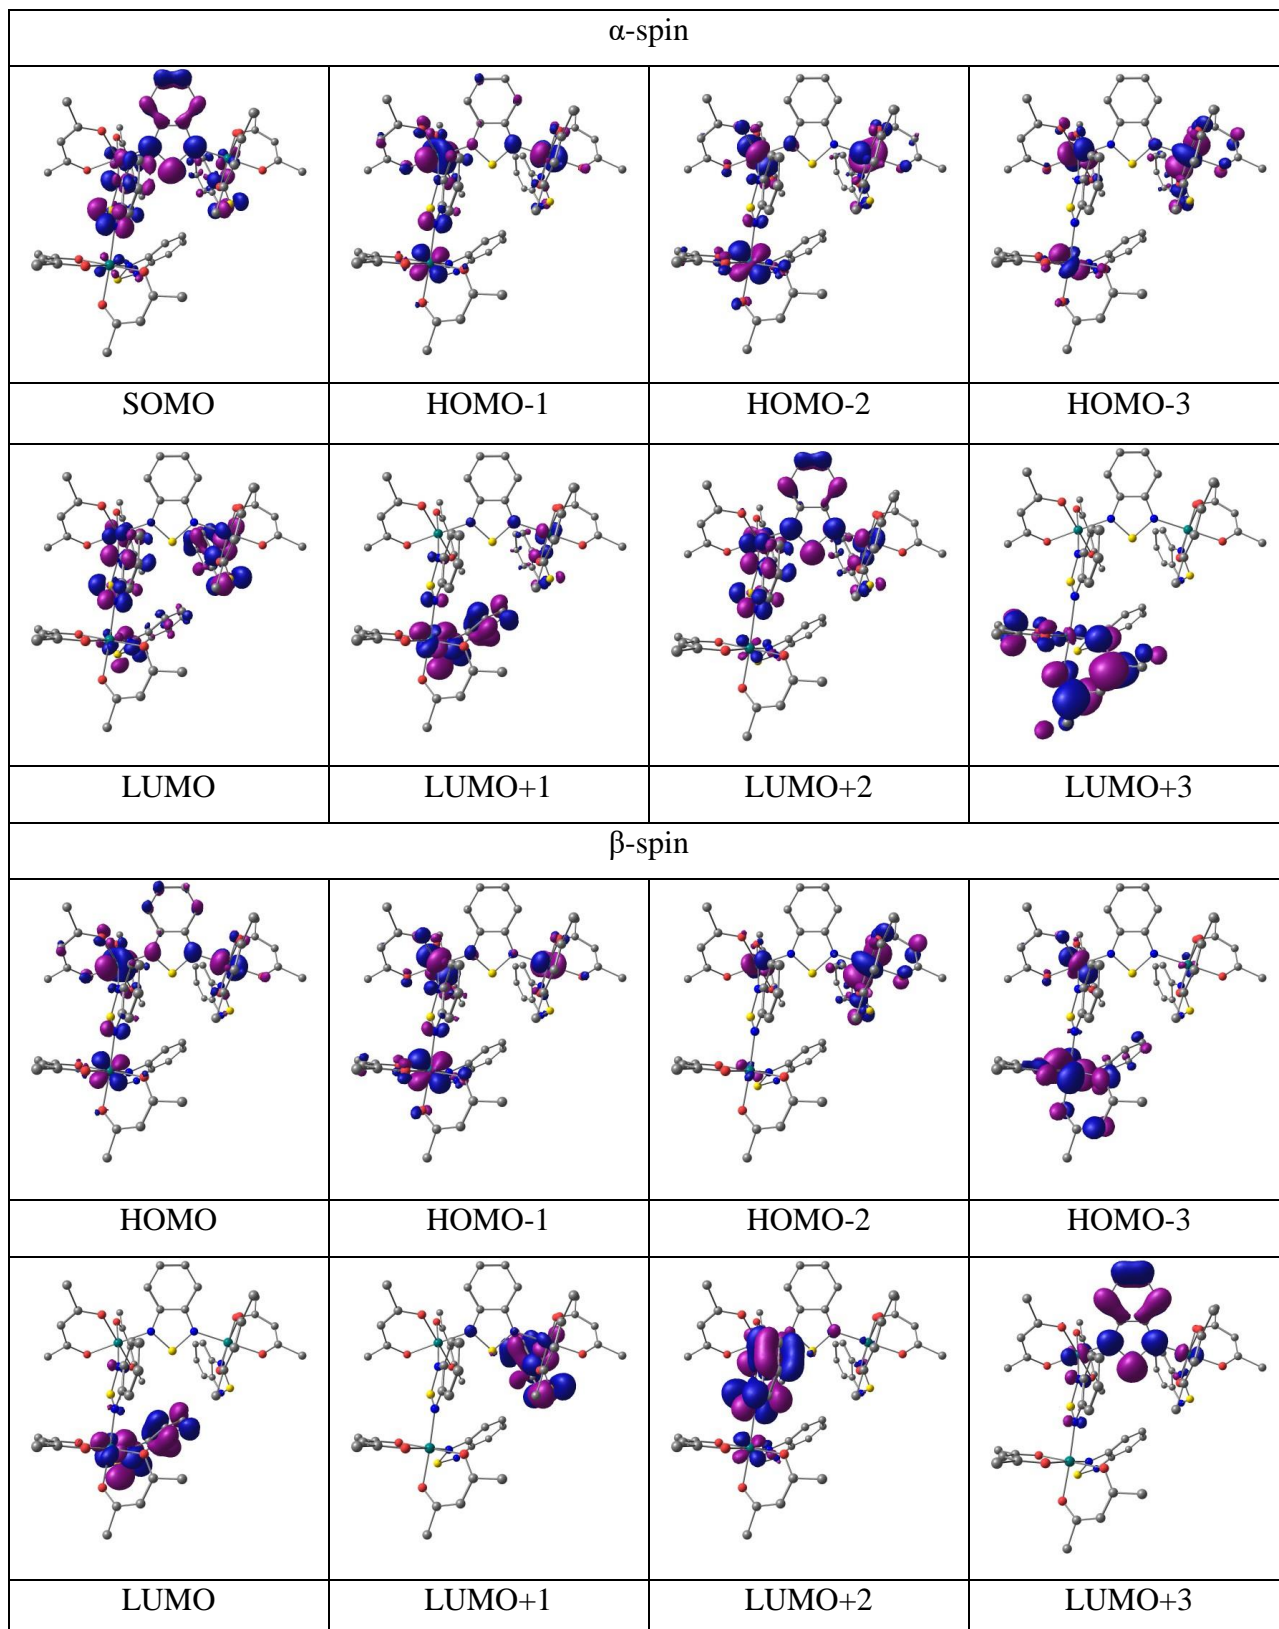

**Table S25** Composition and energies of selected molecular orbitals of  $4^{2-}$  ( $S=1$ )

| MO             | Energy (eV) | % Composition |      |     |
|----------------|-------------|---------------|------|-----|
|                |             | Ru            | acac | BTD |
| $\alpha$ -spin |             |               |      |     |
| LUMO+5         | 3.563       | 4             | 92   | 4   |
| LUMO+4         | 3.435       | 6             | 87   | 6   |
| LUMO+3         | 3.393       | 4             | 92   | 4   |
| LUMO+2         | 3.357       | 3             | 95   | 3   |
| LUMO+1         | 2.476       | 16            | 4    | 81  |
| LUMO           | 2.402       | 14            | 3    | 83  |
| SOMO 1         | 1.748       | 10            | 3    | 87  |
| SOMO 2         | 1.602       | 7             | 2    | 91  |
| HOMO-2         | 0.251       | 66            | 15   | 19  |
| HOMO-3         | 0.024       | 67            | 15   | 18  |
| HOMO-4         | -0.268      | 64            | 18   | 18  |
| HOMO-5         | -0.319      | 67            | 17   | 15  |
| $\beta$ -spin  |             |               |      |     |
| LUMO+5         | 3.397       | 4             | 91   | 5   |
| LUMO+4         | 3.364       | 3             | 93   | 4   |
| LUMO+3         | 3.109       | 10            | 7    | 83  |
| LUMO+2         | 3.065       | 6             | 4    | 91  |
| LUMO+1         | 2.881       | 7             | 3    | 90  |
| LUMO           | 2.283       | 6             | 3    | 91  |
| HOMO           | 0.328       | 66            | 14   | 20  |
| HOMO-1         | 0.055       | 68            | 15   | 17  |
| HOMO-2         | -0.202      | 66            | 17   | 18  |
| HOMO-3         | -0.289      | 66            | 17   | 17  |
| HOMO-4         | -0.336      | 76            | 17   | 7   |
| HOMO-5         | -0.391      | 73            | 18   | 9   |

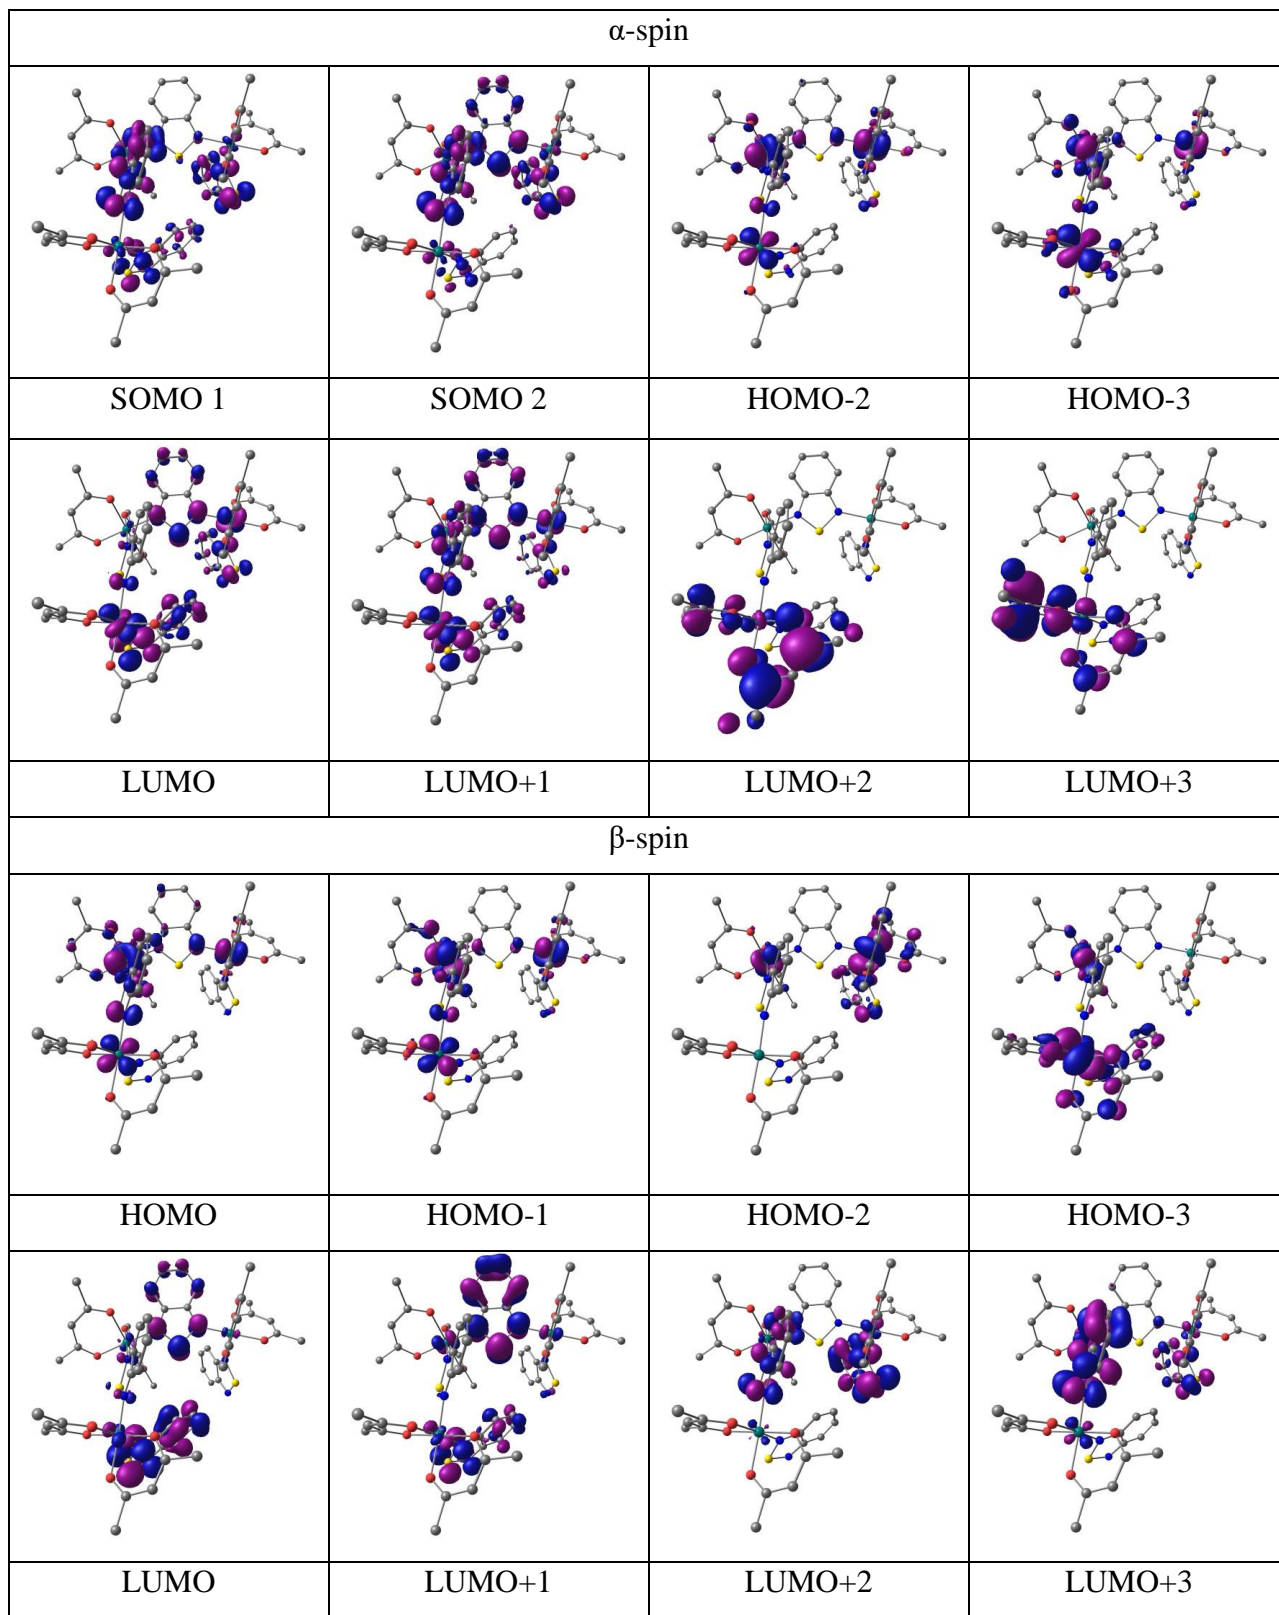

**Table S26** Composition and energies of selected molecular orbitals of  $4^{3-}$  ( $S=3/2$ )

| MO             | Energy (eV) | % Composition |      |     |
|----------------|-------------|---------------|------|-----|
|                |             | Ru            | acac | BTD |
| $\alpha$ -spin |             |               |      |     |
| LUMO+5         | 5.881       | 8             | 86   | 6   |
| LUMO+4         | 5.575       | 5             | 91   | 4   |
| LUMO+3         | 5.560       | 5             | 91   | 4   |
| LUMO+2         | 5.456       | 8             | 86   | 6   |
| LUMO+1         | 5.359       | 3             | 95   | 2   |
| LUMO           | 4.663       | 14            | 4    | 82  |
| SOMO           | 4.231       | 11            | 3    | 86  |
| HOMO-1         | 4.077       | 9             | 3    | 88  |
| HOMO-2         | 3.878       | 8             | 3    | 89  |
| HOMO-3         | 2.520       | 68            | 14   | 18  |
| HOMO-4         | 2.271       | 67            | 15   | 18  |
| HOMO-5         | 2.117       | 71            | 15   | 13  |
| $\beta$ -spin  |             |               |      |     |
| LUMO+5         | 5.582       | 9             | 38   | 53  |
| LUMO+4         | 5.574       | 6             | 76   | 18  |
| LUMO+3         | 5.486       | 6             | 45   | 50  |
| LUMO+2         | 5.435       | 6             | 73   | 21  |
| LUMO+1         | 5.401       | 6             | 55   | 39  |
| LUMO           | 5.327       | 3             | 55   | 41  |
| HOMO           | 2.714       | 65            | 12   | 22  |
| HOMO-1         | 2.464       | 65            | 13   | 22  |
| HOMO-2         | 2.275       | 68            | 14   | 18  |
| HOMO-3         | 2.070       | 65            | 15   | 21  |
| HOMO-4         | 2.041       | 75            | 18   | 7   |
| HOMO-5         | 1.899       | 77            | 16   | 8   |

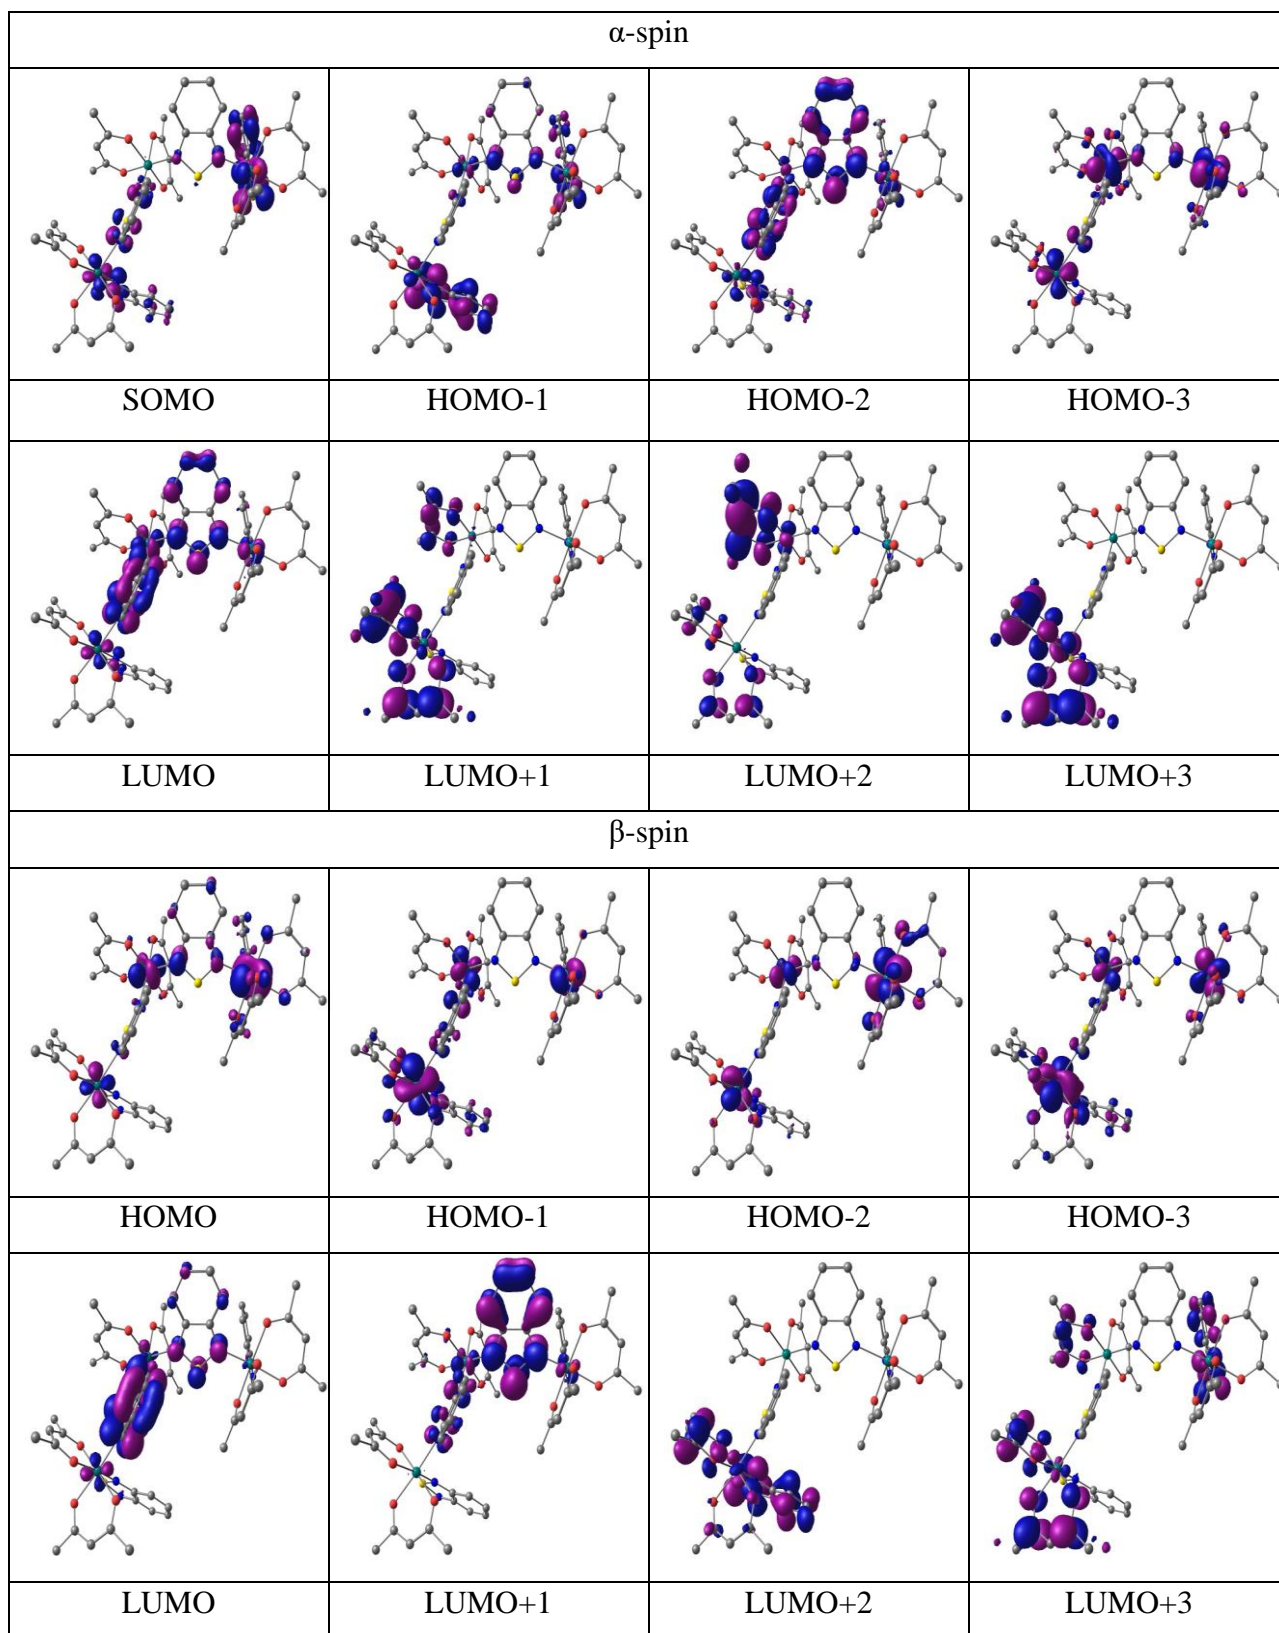

**Table S27** DFT (UB3LYP) calculated Mulliken spin density distributions for cations and anions

| Complex                        | Ru1    | Ru2    | Ru3    | $\mu$ -BTD    | $\eta^1$ -BTD | acac   | CH <sub>3</sub> CN |
|--------------------------------|--------|--------|--------|---------------|---------------|--------|--------------------|
| <b>1</b> <sup>2+</sup> (S=1)   | 0.710  | 0.714  | -      | 0.009         |               | 0.563  | 0.006              |
| <b>1</b> <sup>+</sup> (S=1/2)  | 0.538  | 0.467  | -      | -0.200        |               | 0.199  | -0.002             |
| <b>2</b> <sup>2+</sup> (S=1)   | 0.744  | 0.710  | -      | -0.011        | -0.006        | 0.563  | 0.005              |
| <b>2</b> <sup>+</sup> (S=1/2)  | 0.583  | 0.434  | -      | -0.172        | -0.006        | 0.164  | 0.001              |
| <b>3</b> <sup>2+</sup> (S=1)   | 0.732  | 0.732  | -      | 0.014         | 0.013/0/014   | 0.502  | -                  |
| <b>3</b> <sup>+</sup> (S=1/2)  | 0.523  | 0.523  | -      | -0.218        | 0.000/-0.001  | 0.177  | -                  |
| <b>4</b> <sup>3+</sup> (S=3/2) | 0.725  | 0.720  | 0.719  | 0.010/0.017   | 0.010/0.011   | 0.797  | -                  |
| <b>4</b> <sup>2+</sup> (S=1)   | 0.720  | 0.308  | 0.685  | -0.058/-0.097 | 0.004/0.006   | 0.431  | -                  |
| <b>4</b> <sup>+</sup> (S=1/2)  | 0.436  | 0.533  | 0.171  | -0.205/-0.096 | -0.007/-0.003 | 0.180  | -                  |
| <b>1</b> <sup>-</sup> (S=1/2)  | 0.023  | 0.023  | -      | 0.950         | -             | 0.003  | 0.000              |
| <b>2</b> <sup>-</sup> (S=1/2)  | 0.018  | -0.069 | -      | 0.628         | 0.420         | 0.005  | 0.000              |
| <b>2</b> <sup>2-</sup> (S=1)   | 0.048  | 0.014  | -      | 0.950         | 0.975         | 0.016  | -0.002             |
| <b>3</b> <sup>-</sup> (S=1/2)  | -0.075 | -0.075 | -      | 0.558         | 0.301/0.295   | -0.002 | -                  |
| <b>3</b> <sup>2-</sup> (S=1)   | -0.013 | -0.016 | -      | 0.425         | 0.801/0.798   | 0.005  | -                  |
| <b>4</b> <sup>-</sup> (S=1/2)  | -0.085 | -0.067 | -0.001 | 0.484/0.354   | 0.266/0.052   | -0.002 | -                  |
| <b>4</b> <sup>2-</sup> (S=1)   | -0.076 | -0.059 | 0.046  | 0.676/0.400   | 0.671/0.333   | 0.003  | -                  |
| <b>4</b> <sup>3-</sup> (S=3/2) | -0.036 | 0.026  | 0.024  | 0.644/0.511   | 0.910/0.901   | 0.023  | -                  |



**Table S28** Experimental and TD-DFT (UB3LYP/6-31G\*\*/LANL2DZ) calculated electronic transitions for  $1^n$ -  $3^n$  ( $n = +2, +1, 0$ ) and  $4^m$  ( $m = +3, +2, +1, 0$ ) in CH<sub>3</sub>CN

| $\lambda$ [nm]                                  | $\varepsilon/\text{dm}^3$               | Transitions                                               | Character                                                                                |
|-------------------------------------------------|-----------------------------------------|-----------------------------------------------------------|------------------------------------------------------------------------------------------|
| expt                                            | $\text{mol}^{-1}\text{cm}^{-1}$ ( $f$ ) |                                                           |                                                                                          |
| (DFT)                                           |                                         |                                                           |                                                                                          |
| <b><math>1^{2+}</math> (<math>S=1/2</math>)</b> |                                         |                                                           |                                                                                          |
| 575(621)                                        | 9940 (0.040)                            | HOMO-2( $\beta$ ) $\rightarrow$ LUMO( $\beta$ )(0.38)     | acac( $\pi$ )/Ru( $d\pi$ ) $\rightarrow$ BTD( $\pi^*$ )/acac( $\pi^*$ )<br>/Ru( $d\pi$ ) |
|                                                 |                                         | HOMO-6( $\beta$ ) $\rightarrow$ LUMO( $\beta$ )(0.36)     | acac( $\pi$ )/Ru( $d\pi$ ) $\rightarrow$ BTD( $\pi^*$ )/acac( $\pi^*$ )<br>/Ru( $d\pi$ ) |
| (615)                                           | (0.038)                                 | HOMO-6( $\beta$ ) $\rightarrow$ LUMO( $\beta$ )(0.47)     | acac( $\pi$ )/Ru( $d\pi$ ) $\rightarrow$ BTD( $\pi^*$ )/acac( $\pi^*$ )<br>/Ru( $d\pi$ ) |
| 452(452)                                        | 10620(0.049)                            | HOMO-1( $\beta$ ) $\rightarrow$ LUMO+2( $\beta$ )(0.58)   | acac( $\pi$ )/Ru( $d\pi$ ) $\rightarrow$ BTD( $\pi^*$ )/acac( $\pi^*$ )                  |
| 290(299)                                        | 40070(0.040)                            | HOMO-13( $\alpha$ ) $\rightarrow$ LUMO( $\alpha$ )(0.77)  | acac( $\pi$ )/BTD( $\pi$ ) $\rightarrow$ BTD( $\pi^*$ )                                  |
| (288)                                           | (0.089)                                 | HOMO-11( $\beta$ ) $\rightarrow$ LUMO+2( $\beta$ )(0.48)  | BTD( $\pi$ ) $\rightarrow$ BTD( $\pi^*$ )/Ru( $d\pi$ )                                   |
| 217(265)                                        | 55080(0.031)                            | HOMO-3( $\beta$ ) $\rightarrow$ LUMO+5( $\beta$ )(0.27)   | acac( $\pi$ )/Ru( $d\pi$ ) $\rightarrow$ acac( $\pi^*$ )                                 |
|                                                 |                                         | HOMO-4( $\beta$ ) $\rightarrow$ LUMO+4( $\beta$ )(0.23)   | acac( $\pi$ )/Ru( $d\pi$ ) $\rightarrow$ acac( $\pi^*$ )                                 |
| <b><math>1^+</math> (<math>S=1/2</math>)</b>    |                                         |                                                           |                                                                                          |
| 1890                                            |                                         |                                                           |                                                                                          |
| (1986)                                          | 3800 (0.056)                            | HOMO-1( $\beta$ ) $\rightarrow$ LUMO( $\beta$ )(0.80)     | acac( $\pi$ )/Ru( $d\pi$ ) $\rightarrow$ acac( $\pi^*$ )/Ru( $d\pi$ )                    |
| (1638)                                          | (0.034)                                 | HOMO-2( $\beta$ ) $\rightarrow$ LUMO( $\beta$ )(0.52)     | acac( $\pi$ )/Ru( $d\pi$ ) $\rightarrow$ Ru( $d\pi$ )                                    |
| (1373)                                          | (0.091)                                 | HOMO-4( $\beta$ ) $\rightarrow$ LUMO( $\beta$ )(0.86)     | Ru( $d\pi$ ) $\rightarrow$ Ru( $d\pi$ )                                                  |
| 736(621)                                        | 18740(0.149)                            | HOMO( $\alpha$ ) $\rightarrow$ LUMO( $\alpha$ )(0.66)     | acac( $\pi$ )/Ru( $d\pi$ ) $\rightarrow$ BTD( $\pi^*$ )                                  |
| 555(564)                                        | 6250(0.042)                             | HOMO-8( $\beta$ ) $\rightarrow$ LUMO( $\beta$ )(0.74)     | acac( $\pi$ )/Ru( $d\pi$ ) $\rightarrow$ acac( $\pi^*$ )/Ru( $d\pi$ )                    |
| 337(294)                                        | 15120(0.054)                            | HOMO-4( $\alpha$ ) $\rightarrow$ LUMO+3( $\alpha$ )(0.70) | acac( $\pi$ )/BTD( $\pi$ ) $\rightarrow$ acac( $\pi^*$ )                                 |
| 272(290)                                        | 41050(0.068)                            | HOMO-12( $\beta$ ) $\rightarrow$ LUMO+1( $\beta$ )(0.57)  | BTD( $\pi$ ) $\rightarrow$ BTD( $\pi^*$ )/Ru( $d\pi$ )                                   |
| (290)                                           | (0.035)                                 | HOMO-1( $\beta$ ) $\rightarrow$ LUMO+3( $\beta$ )(0.42)   | acac( $\pi$ )/Ru( $d\pi$ ) $\rightarrow$ acac( $\pi^*$ )                                 |
| 220(264)                                        | 24670(0.39)                             | HOMO-7( $\alpha$ ) $\rightarrow$ LUMO+3( $\alpha$ )(0.42) | acac( $\pi$ ) $\rightarrow$ acac( $\pi^*$ )                                              |
| <b><math>1</math> (<math>S=0</math>)</b>        |                                         |                                                           |                                                                                          |
| 788(692)                                        | 22920(0.1932)                           | HOMO-2 $\rightarrow$ LUMO(0.59)                           | acac( $\pi$ )/Ru( $d\pi$ ) $\rightarrow$ BTD( $\pi^*$ )/Ru( $d\pi$ )                     |
|                                                 | )                                       |                                                           |                                                                                          |
| 540(648)                                        | 5210(0.1663)                            | HOMO-2 $\rightarrow$ LUMO(0.59)                           | acac( $\pi$ )/Ru( $d\pi$ ) $\rightarrow$ BTD( $\pi^*$ )/Ru( $d\pi$ )                     |
| (515)                                           | (0.049)                                 | HOMO-4 $\rightarrow$ LUMO(0.47)                           | acac( $\pi$ )/Ru( $d\pi$ ) $\rightarrow$ BTD( $\pi^*$ )/Ru( $d\pi$ )                     |
| 375(339)                                        | 13360(0.040)                            | HOMO-5 $\rightarrow$ LUMO+3(0.34)                         | BTD( $\pi$ ) $\rightarrow$ acac( $\pi^*$ )                                               |
|                                                 |                                         | HOMO-3 $\rightarrow$ LUMO+3(0.26)                         | acac( $\pi$ )/Ru( $d\pi$ ) $\rightarrow$ acac( $\pi^*$ )                                 |
| (338)                                           | (0.060)                                 | HOMO-4 $\rightarrow$ LUMO+2(0.30)                         | acac( $\pi$ )/Ru( $d\pi$ ) $\rightarrow$ acac( $\pi^*$ )                                 |

|                              |              |                                              |                                                                        |
|------------------------------|--------------|----------------------------------------------|------------------------------------------------------------------------|
|                              |              | HOMO-5→LUMO+2(0.21)                          | BTD( $\pi$ )→acac( $\pi^*$ )                                           |
| 272(337)                     | 46020(0.037) | HOMO-10→LUMO(0.44)                           | acac( $\pi$ )/Ru(d $\pi$ )→BTD( $\pi^*$ )/Ru(d $\pi$ )                 |
|                              |              | HOMO-3→LUMO+4(0.14)                          | acac( $\pi$ )/Ru(d $\pi$ )→acac( $\pi^*$ )                             |
| (333)                        | (0.059)      | HOMO-3→LUMO+1(0.39)                          | acac( $\pi$ )/Ru(d $\pi$ )→acac( $\pi^*$ )                             |
|                              |              | HOMO-10→LUMO(0.28)                           | acac( $\pi$ )/Ru(d $\pi$ )→BTD( $\pi^*$ )/Ru(d $\pi$ )                 |
| 225(256)                     | 31490(0.030) | HOMO-16→LUMO(0.44)                           | acac( $\pi$ )/BTD( $\pi$ )→BTD( $\pi^*$ )/Ru(d $\pi$ )                 |
| (252)                        | (0.061)      | HOMO-8→LUMO+2(0.44)                          | acac( $\pi$ )→acac( $\pi^*$ )                                          |
| <b>1<sup>-</sup> (S=1/2)</b> |              |                                              |                                                                        |
| 720(617)                     | 21720(0.110) | HOMO( $\beta$ )→LUMO( $\beta$ )(0.94)        | acac( $\pi$ )/BTD( $\pi$ )/Ru(d $\pi$ )→acac( $\pi^*$ )/BTD( $\pi^*$ ) |
| 528(480)                     | 8010 (0.012) | HOMO-1( $\beta$ )→LUMO( $\beta$ )(0.61)      | acac( $\pi$ )/BTD( $\pi$ )/Ru(d $\pi$ )→acac( $\pi^*$ )/BTD( $\pi^*$ ) |
| 351(364)                     | 13360(0.079) | HOMO-2( $\alpha$ )→LUMO( $\alpha$ )(0.30)    | Ru(d $\pi$ )→acac( $\pi^*$ )/BTD( $\pi^*$ )                            |
|                              |              | HOMO-2( $\alpha$ )→LUMO( $\alpha$ )(0.28)    | Ru(d $\pi$ )→acac( $\pi^*$ )/BTD( $\pi^*$ )                            |
| 277(316)                     | 59220(0.050) | HOMO-11( $\beta$ )→LUMO( $\beta$ )(0.52)     | acac( $\pi$ )→acac( $\pi^*$ )/BTD( $\pi^*$ )                           |
| <b>2<sup>2+</sup> (S=1)</b>  |              |                                              |                                                                        |
| 563(666)                     | 8130(0.041)  | HOMO-4( $\beta$ )→LUMO( $\beta$ )(0.77)      | acac( $\pi$ )/Ru(d $\pi$ )→acac( $\pi^*$ )/Ru(d $\pi$ )                |
| (635)                        | (0.044)      | HOMO-5( $\beta$ )→LUMO+1( $\beta$ )(0.93)    | acac( $\pi$ )/Ru(d $\pi$ )→acac( $\pi^*$ )/Ru(d $\pi$ )                |
| 465(477)                     | 9900(0.025)  | HOMO-2( $\beta$ )→LUMO+2( $\beta$ )(0.50)    | acac( $\pi$ )/Ru(d $\pi$ )→BTD( $\pi^*$ )                              |
| 403(405)                     | 20670(0.024) | HOMO-1( $\alpha$ )→LUMO+2( $\alpha$ )(0.46)  | acac( $\pi$ )/Ru(d $\pi$ )→acac( $\pi^*$ )/Ru(d $\pi$ )                |
| 293(289)                     | 34990(0.045) | HOMO-13( $\beta$ )→LUMO+2( $\beta$ )(0.62)   | acac( $\pi$ )/BTD( $\pi$ )→BTD( $\pi^*$ )                              |
| 220(287)                     | 45890(0.163) | HOMO-10( $\alpha$ )→LUMO+1( $\alpha$ )(0.53) | acac( $\pi$ )/BTD( $\pi$ )/Ru(d $\pi$ )→BTD( $\pi^*$ )                 |
| <b>2<sup>+</sup> (S=1/2)</b> |              |                                              |                                                                        |
| 1866                         |              |                                              |                                                                        |
| (1720)                       | 3430(0.043)  | HOMO-5( $\beta$ )→LUMO( $\beta$ )(0.52)      | Ru(d $\pi$ )→Ru(d $\pi$ )                                              |
| (1374)                       | (0.109)      | HOMO-5( $\beta$ )→LUMO( $\beta$ )(0.58)      | Ru(d $\pi$ )→Ru(d $\pi$ )                                              |
| 775(744)                     | 19460(0.037) | HOMO( $\beta$ )→LUMO+1( $\beta$ )(0.55)      | acac( $\pi$ )/BTD( $\pi$ )/Ru(d $\pi$ )→BTD( $\pi^*$ )                 |
| 525(582)                     | 7610(0.091)  | HOMO-1( $\alpha$ )→LUMO( $\alpha$ )(0.57)    | acac( $\pi$ )/Ru(d $\pi$ )→BTD( $\pi^*$ )                              |
| (480)                        | (0.063)      | HOMO-3( $\beta$ )→LUMO+1( $\beta$ )(0.70)    | acac( $\pi$ )/Ru(d $\pi$ )→BTD( $\pi^*$ )                              |
| 333(298)                     | 17670(0.019) | HOMO( $\beta$ )→LUMO+9( $\beta$ )(0.47)      | BTD( $\pi$ )/Ru(d $\pi$ )→BTD( $\pi^*$ )/Ru(d $\pi$ )                  |
| 311(288)                     | 21330(0.030) | HOMO-13( $\alpha$ )→LUMO+1( $\alpha$ )(0.45) | acac( $\pi$ )/BTD( $\pi$ )→BTD( $\pi^*$ )                              |
| 276(285)                     | 34890(0.133) | HOMO-12( $\beta$ )→LUMO+2( $\beta$ )(0.57)   | BTD( $\pi$ )→BTD( $\pi^*$ )                                            |
| 218(281)                     | 34720(0.053) | HOMO-6( $\alpha$ )→LUMO+3( $\alpha$ )(0.53)  | acac( $\pi$ )/Ru(d $\pi$ )→acac( $\pi^*$ )                             |
| <b>2 (S=0)</b>               |              |                                              |                                                                        |
| 845(733)                     | 24650(0.076) | HOMO→LUMO(0.61)                              | acac( $\pi$ )/Ru(d $\pi$ )→BTD( $\pi^*$ )                              |
| 610(658)                     | 11060(0.181) | HOMO→LUMO+1(0.40)                            | acac( $\pi$ )/Ru(d $\pi$ )→BTD( $\pi^*$ )                              |
|                              |              | HOMO-2→LUMO(0.30)                            | acac( $\pi$ )/Ru(d $\pi$ )→BTD( $\pi^*$ )                              |

|                              |              |                                              |                                                                                         |
|------------------------------|--------------|----------------------------------------------|-----------------------------------------------------------------------------------------|
| (573)                        | (0.031)      | HOMO-2→LUMO+1(0.35)                          | acac( $\pi$ )/Ru(d $\pi$ )→BTD( $\pi^*$ )                                               |
|                              |              | HOMO→LUMO+1(0.34)                            | acac( $\pi$ )/Ru(d $\pi$ )→BTD( $\pi^*$ )                                               |
| 373(367)                     | 11960(0.025) | HOMO→LUMO+3(0.52)                            | acac( $\pi$ )/Ru(d $\pi$ )→acac( $\pi^*$ )                                              |
| 330(337)                     | 12440(0.058) | HOMO-4→LUMO+4(0.40)                          | Ru(d $\pi$ )→acac( $\pi^*$ )                                                            |
| 273(296)                     | 46260(0.033) | HOMO-15→LUMO(0.48)                           | acac( $\pi$ )→BTD( $\pi^*$ )                                                            |
| 218(265)                     | 30140(0.038) | HOMO-6→LUMO+5(0.44)                          | acac( $\pi$ )→acac( $\pi^*$ )                                                           |
|                              |              | HOMO-8→LUMO+4(0.25)                          | acac( $\pi$ )/Ru(d $\pi$ )→acac( $\pi^*$ )                                              |
| <b>2<sup>-</sup> (S=1/2)</b> |              |                                              |                                                                                         |
| 731(678)                     | 29120(0.044) | HOMO( $\beta$ )→LUMO( $\beta$ )(0.72)        | BTD( $\pi$ )/Ru(d $\pi$ )→BTD( $\pi^*$ )                                                |
| 556(559)                     | 18010(0.043) | HOMO-6( $\alpha$ )→LUMO( $\alpha$ )(0.64)    | Ru(d $\pi$ )→BTD( $\pi^*$ )                                                             |
| (543)                        | (0.095)      | HOMO-3( $\beta$ )→LUMO( $\beta$ )(0.60)      | acac( $\pi$ )/Ru(d $\pi$ )→BTD( $\pi^*$ )                                               |
| 485(465)                     | 13380(0.016) | HOMO-4( $\beta$ )→LUMO+1( $\beta$ )(0.52)    | acac( $\pi$ )/Ru(d $\pi$ )→BTD( $\pi^*$ )                                               |
| (446)                        | (0.018)      | HOMO-5( $\beta$ )→LUMO+1( $\beta$ )(0.46)    | acac( $\pi$ )/Ru(d $\pi$ )→BTD( $\pi^*$ )                                               |
| 335(356)                     | 19400(0.077) | HOMO-4( $\beta$ )→LUMO+4( $\beta$ )(0.48)    | acac( $\pi$ )/Ru(d $\pi$ )→acac( $\pi^*$ )                                              |
|                              |              | HOMO-5( $\alpha$ )→LUMO+2( $\alpha$ )(0.46)  | acac( $\pi$ )/Ru(d $\pi$ )→acac( $\pi^*$ )                                              |
| 228(293)                     | 46500(0.043) | HOMO-13( $\beta$ )→LUMO( $\beta$ )(0.56)     | BTD( $\pi$ )→BTD( $\pi^*$ )                                                             |
| <b>2<sup>2-</sup> (S=1)</b>  |              |                                              |                                                                                         |
| 703(639)                     | 23280(0.097) | HOMO( $\beta$ )→LUMO( $\beta$ )(0.85)        | BTD( $\pi$ )/Ru(d $\pi$ )→acac( $\pi^*$ )                                               |
| 550(565)                     | 19280(0.044) | HOMO( $\beta$ )→LUMO+1( $\beta$ )(0.74)      | BTD( $\pi$ )/Ru(d $\pi$ )→acac( $\pi^*$ )                                               |
| 332(363)                     | 20720(0.063) | HOMO-5( $\beta$ )→LUMO+2( $\beta$ )(0.52)    | acac( $\pi$ )/Ru(d $\pi$ )→BTD( $\pi^*$ )                                               |
| (317)                        | (0.030)      | HOMO-6( $\alpha$ )→LUMO+3( $\alpha$ )(0.46)  | acac( $\pi$ )/Ru(d $\pi$ )→acac( $\pi^*$ )                                              |
| 260(313)                     | 50470(0.031) | HOMO-7( $\beta$ )→LUMO+2( $\beta$ )(0.42)    | BTD( $\pi$ )→acac( $\pi^*$ )                                                            |
|                              |              | HOMO-8( $\beta$ )→LUMO( $\beta$ )(0.36)      | BTD( $\pi$ )/Ru(d $\pi$ )→acac( $\pi^*$ )                                               |
| (310)                        | (0.093)      | HOMO-10( $\beta$ )→LUMO+1( $\beta$ )(0.55)   | acac( $\pi$ )→acac( $\pi^*$ )                                                           |
| <b>3<sup>2+</sup> (S=1)</b>  |              |                                              |                                                                                         |
| 560(625)                     | 8380(0.044)  | HOMO-1( $\beta$ )→LUMO+1( $\beta$ )(0.54)    | acac( $\pi$ )/Ru(d $\pi$ )→BTD( $\pi^*$ )/acac( $\pi^*$ )<br>/Ru(d $\pi$ )              |
| (536)                        | (0.054)      | HOMO-5( $\beta$ )→LUMO+1( $\beta$ )(0.50)    | acac( $\pi$ )/BTD( $\pi$ )/Ru(d $\pi$ )→BTD( $\pi^*$ )/<br>acac( $\pi^*$ )/Ru(d $\pi$ ) |
| 475(464)                     | 9960(0.061)  | HOMO-2( $\alpha$ )→LUMO+1( $\alpha$ )(0.69)  | acac( $\pi$ )/Ru(d $\pi$ )→BTD( $\pi^*$ )                                               |
| 402(394)                     | 14270(0.036) | HOMO-2( $\beta$ )→LUMO+4( $\beta$ )(0.39)    | acac( $\pi$ )/BTD( $\pi$ )/Ru(d $\pi$ )→BTD( $\pi^*$ )                                  |
|                              |              | HOMO-1( $\beta$ )→LUMO+3( $\beta$ )(0.35)    | acac( $\pi$ )/Ru(d $\pi$ )→BTD( $\pi^*$ )                                               |
| 297(291)                     | 43340(0.069) | HOMO-13( $\beta$ )→LUMO+2( $\beta$ )(0.49)   | acac( $\pi$ )→BTD( $\pi^*$ )                                                            |
|                              |              | HOMO-13( $\alpha$ )→LUMO( $\alpha$ )(0.37)   | acac( $\pi$ )→BTD( $\pi^*$ )                                                            |
| 222(286)                     | 51890(0.171) | HOMO-11( $\beta$ )→LUMO+3( $\beta$ )(0.52)   | BTD( $\pi$ )→BTD( $\pi^*$ )                                                             |
|                              |              | HOMO-12( $\alpha$ )→LUMO+2( $\alpha$ )(0.36) | BTD( $\pi$ )→BTD( $\pi^*$ )                                                             |
| <b>3<sup>+</sup> (S=1/2)</b> |              |                                              |                                                                                         |

|                              |              |                                                           |                                                                       |
|------------------------------|--------------|-----------------------------------------------------------|-----------------------------------------------------------------------|
| 1838                         |              |                                                           |                                                                       |
| (1930)                       | 2890(0.059)  | HOMO-2( $\beta$ ) $\rightarrow$ LUMO( $\beta$ )(0.70)     | acac( $\pi$ )/Ru(d $\pi$ ) $\rightarrow$ Ru(d $\pi$ )                 |
| (1627)                       | (0.097)      | HOMO-3( $\beta$ ) $\rightarrow$ LUMO( $\beta$ )(0.76)     | Ru(d $\pi$ ) $\rightarrow$ Ru(d $\pi$ )                               |
| 782(776)                     | 19630(0.025) | HOMO( $\beta$ ) $\rightarrow$ LUMO+1( $\beta$ )(0.91)     | acac( $\pi$ )/BTD( $\pi$ )/Ru(d $\pi$ ) $\rightarrow$ BTD( $\pi^*$ )  |
| (633)                        | (0.128)      | HOMO-2( $\alpha$ ) $\rightarrow$ LUMO+1( $\alpha$ )(0.66) | acac( $\pi$ )/Ru(d $\pi$ ) $\rightarrow$ BTD( $\pi^*$ )               |
| 525(598)                     | 12050(0.043) | HOMO( $\beta$ ) $\rightarrow$ LUMO+2( $\beta$ )(0.58)     | acac( $\pi$ )/BTD( $\pi$ )/Ru(d $\pi$ ) $\rightarrow$ BTD( $\pi^*$ )  |
| (578)                        | (0.38)       | HOMO-8( $\beta$ ) $\rightarrow$ LUMO( $\beta$ )(0.81)     | acac( $\pi$ )/BTD( $\pi$ ) $\rightarrow$ BTD( $\pi^*$ )/Ru(d $\pi$ )  |
| 307(297)                     | 34300(0.030) | HOMO-2( $\beta$ ) $\rightarrow$ LUMO+5( $\beta$ )(0.34)   | acac( $\pi$ )/Ru(d $\pi$ ) $\rightarrow$ acac( $\pi^*$ )/Ru(d $\pi$ ) |
|                              |              | HOMO-4( $\alpha$ ) $\rightarrow$ LUMO+4( $\alpha$ )(0.27) | acac( $\pi$ )/Ru(d $\pi$ ) $\rightarrow$ acac( $\pi^*$ )              |
| 275(290)                     | 48600(0.048) | HOMO-16( $\beta$ ) $\rightarrow$ LUMO+2( $\beta$ )(0.43)  | BTD( $\pi$ ) $\rightarrow$ BTD( $\pi^*$ )                             |
|                              |              | HOMO-12( $\beta$ ) $\rightarrow$ LUMO+2( $\beta$ )(0.42)  | acac( $\pi$ )/BTD( $\pi$ ) $\rightarrow$ BTD( $\pi^*$ )               |
| 220(281)                     | 41980(0.082) | HOMO-13( $\beta$ ) $\rightarrow$ LUMO+3( $\beta$ )(0.41)  | acac( $\pi$ )/BTD( $\pi$ ) $\rightarrow$ BTD( $\pi^*$ )               |
|                              |              | HOMO-3( $\beta$ ) $\rightarrow$ LUMO+6( $\beta$ )(0.18)   | acac( $\pi$ ) $\rightarrow$ acac( $\pi^*$ )                           |
| <b>3 (S=0)</b>               |              |                                                           |                                                                       |
| 875(784)                     | 21670(0.170) | HOMO $\rightarrow$ LUMO(0.69)                             | acac( $\pi$ )/Ru(d $\pi$ ) $\rightarrow$ BTD( $\pi^*$ )               |
| (651)                        | (0.081)      | HOMO-2 $\rightarrow$ LUMO+2(0.44)                         | Ru(d $\pi$ ) $\rightarrow$ BTD( $\pi^*$ )                             |
|                              |              | HOMO-2 $\rightarrow$ LUMO(0.39)                           | Ru(d $\pi$ ) $\rightarrow$ BTD( $\pi^*$ )                             |
| 582(585)                     | 14480(0.033) | HOMO-5 $\rightarrow$ LUMO(0.48)                           | Ru(d $\pi$ ) $\rightarrow$ BTD( $\pi^*$ )                             |
|                              |              | HOMO-4 $\rightarrow$ LUMO+1(0.31)                         | acac( $\pi$ )/Ru(d $\pi$ ) $\rightarrow$ BTD( $\pi^*$ )               |
| (550)                        | (0.064)      | HOMO-4 $\rightarrow$ LUMO(0.31)                           | acac( $\pi$ )/Ru(d $\pi$ ) $\rightarrow$ BTD( $\pi^*$ )               |
|                              |              | HOMO-1 $\rightarrow$ LUMO(0.25)                           | acac( $\pi$ )/Ru(d $\pi$ ) $\rightarrow$ BTD( $\pi^*$ )               |
| 382(418)                     | 13550(0.021) | HOMO-2 $\rightarrow$ LUMO+1(0.57)                         | Ru(d $\pi$ ) $\rightarrow$ acac( $\pi^*$ )                            |
| (400)                        | (0.021)      | HOMO-2 $\rightarrow$ LUMO+2(0.29)                         | Ru(d $\pi$ ) $\rightarrow$ acac( $\pi^*$ )                            |
| 330(336)                     | 11940(0.124) | HOMO-3 $\rightarrow$ LUMO+4(0.37)                         | acac( $\pi$ )/Ru(d $\pi$ ) $\rightarrow$ acac( $\pi^*$ )/Ru(d $\pi$ ) |
|                              |              | HOMO-5 $\rightarrow$ LUMO+4(0.23)                         | Ru(d $\pi$ ) $\rightarrow$ acac( $\pi^*$ )/Ru(d $\pi$ )               |
| 273(287)                     | 47850(0.093) | HOMO-17 $\rightarrow$ LUMO+1(0.44)                        | acac( $\pi$ )/BTD( $\pi$ ) $\rightarrow$ BTD( $\pi^*$ )               |
|                              |              | HOMO $\rightarrow$ LUMO+15(0.15)                          | acac( $\pi$ )/Ru(d $\pi$ ) $\rightarrow$ BTD( $\pi^*$ )               |
| 215(253)                     | 28710(0.059) | HOMO-3 $\rightarrow$ LUMO+13(0.41)                        | acac( $\pi$ )/Ru(d $\pi$ ) $\rightarrow$ BTD( $\pi^*$ )               |
|                              |              | HOMO-8 $\rightarrow$ LUMO+5(0.20)                         | acac( $\pi$ )/BTD( $\pi$ ) $\rightarrow$ acac( $\pi^*$ )              |
| <b>3<sup>-</sup> (S=1/2)</b> |              |                                                           |                                                                       |
| 1022                         | 3960(0.011)  | HOMO-1( $\alpha$ ) $\rightarrow$ LUMO+1( $\alpha$ )(0.63) | BTD( $\pi$ )/Ru(d $\pi$ ) $\rightarrow$ BTD( $\pi^*$ )                |
| (1050)                       |              |                                                           |                                                                       |
| 692(728)                     | 16350(0.047) | HOMO( $\beta$ ) $\rightarrow$ LUMO( $\beta$ )(0.84)       | BTD( $\pi$ )/Ru(d $\pi$ ) $\rightarrow$ BTD( $\pi^*$ )                |
| (634)                        | (0.091)      | HOMO( $\beta$ ) $\rightarrow$ LUMO+2( $\beta$ )(0.62)     | BTD( $\pi$ )/Ru(d $\pi$ ) $\rightarrow$ BTD( $\pi^*$ )                |
| 540(580)                     | 21980(0.057) | HOMO-2( $\alpha$ ) $\rightarrow$ LUMO+1( $\alpha$ )(0.50) | acac( $\pi$ )/BTD( $\pi$ )/Ru(d $\pi$ ) $\rightarrow$ BTD( $\pi^*$ )  |
| (541)                        | (0.153)      | HOMO( $\beta$ ) $\rightarrow$ LUMO+2( $\beta$ )(0.51)     | BTD( $\pi$ )/Ru(d $\pi$ ) $\rightarrow$ BTD( $\pi^*$ )                |
| (530)                        | (0.050)      | HOMO-1( $\beta$ ) $\rightarrow$ LUMO+2( $\beta$ )(0.51)   | acac( $\pi$ )/Ru(d $\pi$ ) $\rightarrow$ BTD( $\pi^*$ )               |
| (516)                        | (0.050)      | HOMO-3( $\beta$ ) $\rightarrow$ LUMO+1( $\beta$ )(0.51)   | acac( $\pi$ )/Ru(d $\pi$ ) $\rightarrow$ BTD( $\pi^*$ )               |

|                               |              |                                                           |                                                                                                       |
|-------------------------------|--------------|-----------------------------------------------------------|-------------------------------------------------------------------------------------------------------|
| 345(351)                      | 15350(0.126) | HOMO-3( $\beta$ ) $\rightarrow$ LUMO+4( $\beta$ )(0.37)   | acac( $\pi$ )/Ru(d $\pi$ ) $\rightarrow$ acac( $\pi^*$ )                                              |
|                               |              | HOMO-4( $\alpha$ ) $\rightarrow$ LUMO+3( $\alpha$ )(0.33) | acac( $\pi$ )/Ru(d $\pi$ ) $\rightarrow$ acac( $\pi^*$ )                                              |
| 220(291)                      | 50470(0.094) | HOMO-18( $\alpha$ ) $\rightarrow$ LUMO( $\alpha$ )(0.38)  | acac( $\pi$ )/BTD( $\pi$ ) $\rightarrow$ BTD( $\pi^*$ )                                               |
|                               |              | HOMO-19( $\beta$ ) $\rightarrow$ LUMO( $\beta$ )(0.28)    | acac( $\pi$ ) $\rightarrow$ BTD( $\pi^*$ )                                                            |
| <b>3<sup>2-</sup> (S=1)</b>   |              |                                                           |                                                                                                       |
| 767(727)                      | 17240(0.147) | HOMO( $\beta$ ) $\rightarrow$ LUMO( $\beta$ )(0.69)       | BTD( $\pi$ )/Ru(d $\pi$ ) $\rightarrow$ BTD( $\pi^*$ )                                                |
| (722)                         | (0.032)      | HOMO-5( $\alpha$ ) $\rightarrow$ LUMO( $\alpha$ )(0.58)   | Ru(d $\pi$ ) $\rightarrow$ BTD( $\pi^*$ )                                                             |
| 562(556)                      | 15060(0.073) | HOMO( $\beta$ ) $\rightarrow$ LUMO+2( $\beta$ )(0.67)     | BTD( $\pi$ )/Ru(d $\pi$ ) $\rightarrow$ BTD( $\pi^*$ )                                                |
| (540)                         | (0.085)      | HOMO( $\beta$ ) $\rightarrow$ LUMO+2( $\beta$ )(0.75)     | BTD( $\pi$ )/Ru(d $\pi$ ) $\rightarrow$ BTD( $\pi^*$ )                                                |
| 396(364)                      | 12670(0.161) | HOMO-5( $\alpha$ ) $\rightarrow$ LUMO+2( $\alpha$ )(0.34) | Ru(d $\pi$ ) $\rightarrow$ acac( $\pi^*$ )                                                            |
|                               |              | HOMO-3( $\beta$ ) $\rightarrow$ LUMO+4( $\beta$ )(0.28)   | Ru(d $\pi$ ) $\rightarrow$ acac( $\pi^*$ )                                                            |
| 308(301)                      | 38380(0.172) | HOMO-12( $\beta$ ) $\rightarrow$ LUMO+2( $\beta$ )(0.48)  | acac( $\pi$ )/BTD( $\pi$ ) $\rightarrow$ BTD( $\pi^*$ )                                               |
|                               |              | HOMO-8( $\beta$ ) $\rightarrow$ LUMO+2( $\beta$ )(0.48)   | BTD( $\pi$ ) $\rightarrow$ BTD( $\pi^*$ )                                                             |
| 240(297)                      | 50470(0.020) | HOMO( $\beta$ ) $\rightarrow$ LUMO+9( $\beta$ )(0.50)     | BTD( $\pi$ )/Ru(d $\pi$ ) $\rightarrow$ BTD( $\pi^*$ )/acac( $\pi^*$ )<br>/Ru(d $\pi$ )               |
|                               |              | HOMO-2( $\alpha$ ) $\rightarrow$ LUMO+6( $\alpha$ )(0.44) | Ru(d $\pi$ ) $\rightarrow$ BTD( $\pi^*$ )/acac( $\pi^*$ )/Ru(d $\pi$ )                                |
| <b>4<sup>3+</sup> (S=1/2)</b> |              |                                                           |                                                                                                       |
| 570(642)                      | 8460(0.053)  | HOMO-10( $\beta$ ) $\rightarrow$ LUMO+1( $\beta$ )(0.37)  | acac( $\pi$ )/BTD( $\pi$ )/Ru(d $\pi$ ) $\rightarrow$ BTD( $\pi^*$ )/<br>acac( $\pi^*$ )/Ru(d $\pi$ ) |
|                               |              | HOMO-9( $\beta$ ) $\rightarrow$ LUMO+2( $\beta$ )(0.24)   | acac( $\pi$ )/Ru(d $\pi$ ) $\rightarrow$ BTD( $\pi^*$ )/acac( $\pi^*$ )<br>/Ru(d $\pi$ )              |
| 489(463)                      | 9310(0.037)  | HOMO-4( $\alpha$ ) $\rightarrow$ LUMO( $\alpha$ )(0.38)   | acac( $\pi$ )/Ru(d $\pi$ ) $\rightarrow$ BTD( $\pi^*$ )                                               |
|                               |              | HOMO-3( $\beta$ ) $\rightarrow$ LUMO+3( $\beta$ )(0.25)   | acac( $\pi$ )/Ru(d $\pi$ ) $\rightarrow$ BTD( $\pi^*$ )                                               |
| 402(394)                      | 11270(0.016) | HOMO-3( $\beta$ ) $\rightarrow$ LUMO+5( $\beta$ )(0.35)   | acac( $\pi$ )/Ru(d $\pi$ ) $\rightarrow$ BTD( $\pi^*$ )                                               |
|                               |              | HOMO-9( $\beta$ ) $\rightarrow$ LUMO+3( $\beta$ )(0.21)   | acac( $\pi$ )/Ru(d $\pi$ ) $\rightarrow$ BTD( $\pi^*$ )                                               |
| 298(363)                      | 36690(0.010) | HOMO( $\beta$ ) $\rightarrow$ LUMO+6( $\beta$ )(0.52)     | acac( $\pi$ )/Ru(d $\pi$ ) $\rightarrow$ BTD( $\pi^*$ )                                               |
|                               |              | HOMO-12( $\beta$ ) $\rightarrow$ LUMO+3( $\beta$ )(0.26)  | BTD( $\pi$ )/Ru(d $\pi$ ) $\rightarrow$ BTD( $\pi^*$ )                                                |
| <b>4<sup>2+</sup> (S=1)</b>   |              |                                                           |                                                                                                       |
| 1735                          | 2400         |                                                           |                                                                                                       |
| (1839)                        | .....(0.050) | HOMO( $\beta$ ) $\rightarrow$ LUMO( $\beta$ )(0.54)       | acac( $\pi$ )/BTD( $\pi$ )/Ru(d $\pi$ ) $\rightarrow$ Ru(d $\pi$ )                                    |
| (1601)                        | .....(0.031) | HOMO( $\beta$ ) $\rightarrow$ LUMO( $\beta$ )(0.51)       | acac( $\pi$ )/BTD( $\pi$ )/Ru(d $\pi$ ) $\rightarrow$ Ru(d $\pi$ )                                    |
| 825(835)                      | 10960(0.030) | HOMO( $\beta$ ) $\rightarrow$ LUMO+2( $\beta$ )(0.67)     | acac( $\pi$ )/BTD( $\pi$ )/Ru(d $\pi$ ) $\rightarrow$ BTD( $\pi^*$ )                                  |
| (698)                         | .....(0.096) | HOMO( $\alpha$ ) $\rightarrow$ LUMO( $\alpha$ )(0.66)     | acac( $\pi$ )/Ru(d $\pi$ ) $\rightarrow$ BTD( $\pi^*$ )                                               |
| 550(555)                      | 8460(0.029)  | HOMO-2( $\alpha$ ) $\rightarrow$ LUMO+1( $\alpha$ )(0.49) | acac( $\pi$ )/Ru(d $\pi$ ) $\rightarrow$ BTD( $\pi^*$ )                                               |
|                               |              | HOMO( $\beta$ ) $\rightarrow$ LUMO+5( $\beta$ )(0.34)     | acac( $\pi$ )/BTD( $\pi$ )/Ru(d $\pi$ ) $\rightarrow$ BTD( $\pi^*$ )                                  |
| (500)                         | (0.042)      | HOMO-2( $\beta$ ) $\rightarrow$ LUMO+3( $\beta$ )(0.51)   | acac( $\pi$ )/Ru(d $\pi$ ) $\rightarrow$ BTD( $\pi^*$ )                                               |
| 398(442)                      | 8690(0.015)  | HOMO-3( $\alpha$ ) $\rightarrow$ LUMO+2( $\alpha$ )(0.51) | acac( $\pi$ )/Ru(d $\pi$ ) $\rightarrow$ BTD( $\pi^*$ )                                               |
| (405)                         | (0.015)      | HOMO-7( $\alpha$ ) $\rightarrow$ LUMO+3( $\alpha$ )(0.25) | acac( $\pi$ )/Ru(d $\pi$ ) $\rightarrow$ BTD( $\pi^*$ )                                               |

|          |              |                                                            |                                                                      |
|----------|--------------|------------------------------------------------------------|----------------------------------------------------------------------|
|          |              | HOMO-18( $\beta$ ) $\rightarrow$ LUMO( $\beta$ )(0.23)     | acac( $\pi$ )/BTD( $\pi$ ) $\rightarrow$ BTD( $\pi^*$ )/Ru(d $\pi$ ) |
| 280(376) | 33850(0.022) | HOMO-12( $\beta$ ) $\rightarrow$ LUMO+2( $\beta$ )(0.41)   | acac( $\pi$ )/Ru(d $\pi$ ) $\rightarrow$ BTD( $\pi^*$ )              |
|          |              | HOMO-10( $\alpha$ ) $\rightarrow$ LUMO+3( $\alpha$ )(0.20) | acac( $\pi$ )/BTD( $\pi$ )/Ru(d $\pi$ ) $\rightarrow$ BTD( $\pi^*$ ) |

---

**4<sup>+</sup> (S=1/2)**

---

|          |              |                                                            |                                                                      |
|----------|--------------|------------------------------------------------------------|----------------------------------------------------------------------|
| 1860     |              |                                                            |                                                                      |
| (1746)   | 2840(0.027)  | HOMO-1( $\beta$ ) $\rightarrow$ LUMO( $\beta$ )(0.56)      | acac( $\pi$ )/Ru(d $\pi$ ) $\rightarrow$ Ru(d $\pi$ )                |
| (1595)   | (0.038)      | HOMO-5( $\beta$ ) $\rightarrow$ LUMO( $\beta$ )(0.63)      | acac( $\pi$ )/Ru(d $\pi$ ) $\rightarrow$ Ru(d $\pi$ )                |
| (1255)   | (0.045)      | HOMO-8( $\beta$ ) $\rightarrow$ LUMO( $\beta$ )(0.49)      | acac( $\pi$ )/Ru(d $\pi$ ) $\rightarrow$ Ru(d $\pi$ )                |
|          |              | HOMO-6( $\beta$ ) $\rightarrow$ LUMO( $\beta$ )(0.27)      | acac( $\pi$ )/Ru(d $\pi$ ) $\rightarrow$ Ru(d $\pi$ )                |
| 938      | 9120         |                                                            |                                                                      |
| (1011)   | (0.012)      | HOMO( $\beta$ ) $\rightarrow$ LUMO+1( $\beta$ )(0.58)      | acac( $\pi$ )/BTD( $\pi$ )/Ru(d $\pi$ ) $\rightarrow$ BTD( $\pi^*$ ) |
| 810(824) | 12560(0.025) | HOMO-1( $\beta$ ) $\rightarrow$ LUMO+1( $\beta$ )(0.43)    | acac( $\pi$ )/BTD( $\pi$ )/Ru(d $\pi$ ) $\rightarrow$ BTD( $\pi^*$ ) |
|          |              | HOMO( $\beta$ ) $\rightarrow$ LUMO+1( $\beta$ )(0.43)      | acac( $\pi$ )/BTD( $\pi$ )/Ru(d $\pi$ ) $\rightarrow$ BTD( $\pi^*$ ) |
| 745(716) | 12140(0.035) | HOMO( $\alpha$ ) $\rightarrow$ LUMO+1( $\alpha$ )(0.44)    | acac( $\pi$ )/Ru(d $\pi$ ) $\rightarrow$ BTD( $\pi^*$ )              |
|          |              | HOMO( $\beta$ ) $\rightarrow$ LUMO+3( $\beta$ )(0.33)      | acac( $\pi$ )/BTD( $\pi$ )/Ru(d $\pi$ ) $\rightarrow$ BTD( $\pi^*$ ) |
| 540(572) | 9600(0.061)  | HOMO-1( $\alpha$ ) $\rightarrow$ LUMO+3( $\alpha$ )(0.38)  | acac( $\pi$ )/Ru(d $\pi$ ) $\rightarrow$ BTD( $\pi^*$ )              |
|          |              | HOMO-4( $\beta$ ) $\rightarrow$ LUMO+1( $\beta$ )(0.29)    | acac( $\pi$ )/Ru(d $\pi$ ) $\rightarrow$ BTD( $\pi^*$ )              |
| (540)    | (0.053)      | HOMO-3( $\alpha$ ) $\rightarrow$ LUMO+3( $\alpha$ )(0.47)  | acac( $\pi$ )/Ru(d $\pi$ ) $\rightarrow$ BTD( $\pi^*$ )              |
|          |              | HOMO( $\alpha$ ) $\rightarrow$ LUMO+3( $\alpha$ )(0.29)    | acac( $\pi$ )/Ru(d $\pi$ ) $\rightarrow$ BTD( $\pi^*$ )              |
| 275(380) | 36870(0.011) | HOMO-12( $\alpha$ ) $\rightarrow$ LUMO+1( $\alpha$ )(0.43) | acac( $\pi$ )/BTD( $\pi$ )/Ru(d $\pi$ ) $\rightarrow$ BTD( $\pi^*$ ) |
|          |              | HOMO-11( $\beta$ ) $\rightarrow$ LUMO+2( $\beta$ )(0.19)   | acac( $\pi$ ) $\rightarrow$ BTD( $\pi^*$ )                           |

---

**4 (S=0)**

---

|          |              |                                    |                                                          |
|----------|--------------|------------------------------------|----------------------------------------------------------|
| 975      | 22010        |                                    |                                                          |
| (845)    | (0.1709)     | HOMO $\rightarrow$ LUMO(0.69)      | acac( $\pi$ )/Ru(d $\pi$ ) $\rightarrow$ BTD( $\pi^*$ )  |
| 746(731) | 12210(0.080) | HOMO $\rightarrow$ LUMO+1(0.54)    | acac( $\pi$ )/Ru(d $\pi$ ) $\rightarrow$ BTD( $\pi^*$ )  |
|          |              | HOMO-1 $\rightarrow$ LUMO(0.32)    | acac( $\pi$ )/Ru(d $\pi$ ) $\rightarrow$ BTD( $\pi^*$ )  |
| 590(637) | 12440(0.172) | HOMO $\rightarrow$ LUMO+3(0.30)    | acac( $\pi$ )/Ru(d $\pi$ ) $\rightarrow$ BTD( $\pi^*$ )  |
|          |              | HOMO-2 $\rightarrow$ LUMO+3(0.27)  | acac( $\pi$ )/Ru(d $\pi$ ) $\rightarrow$ BTD( $\pi^*$ )  |
| 371(397) | 10650(0.042) | HOMO-13 $\rightarrow$ LUMO(0.36)   | acac( $\pi$ ) $\rightarrow$ BTD( $\pi^*$ )               |
|          |              | HOMO-12 $\rightarrow$ LUMO+1(0.24) | acac( $\pi$ ) $\rightarrow$ BTD( $\pi^*$ )               |
| 275(334) | 47540(0.091) | HOMO-7 $\rightarrow$ LUMO+6(0.30)  | Ru(d $\pi$ ) $\rightarrow$ acac( $\pi^*$ )               |
|          |              | HOMO-4 $\rightarrow$ LUMO+6(0.19)  | acac( $\pi$ )/Ru(d $\pi$ ) $\rightarrow$ acac( $\pi^*$ ) |

---

**4<sup>-</sup> (S=1/2)**

---

|          |              |                                                           |                                                                      |
|----------|--------------|-----------------------------------------------------------|----------------------------------------------------------------------|
| 846(759) | 25200(0.025) | HOMO( $\beta$ ) $\rightarrow$ LUMO+1( $\beta$ )(0.73)     | BTD( $\pi$ )/Ru(d $\pi$ ) $\rightarrow$ BTD( $\pi^*$ )               |
| 643(702) | 24340(0.099) | HOMO( $\beta$ ) $\rightarrow$ LUMO+2( $\beta$ )(0.64)     | BTD( $\pi$ )/Ru(d $\pi$ ) $\rightarrow$ BTD( $\pi^*$ )               |
| (625)    | (0.159)      | HOMO-3( $\alpha$ ) $\rightarrow$ LUMO+2( $\alpha$ )(0.47) | acac( $\pi$ )/BTD( $\pi$ )/Ru(d $\pi$ ) $\rightarrow$ BTD( $\pi^*$ ) |
|          |              | HOMO-2( $\beta$ ) $\rightarrow$ LUMO+1( $\beta$ )(0.26)   | acac( $\pi$ )/Ru(d $\pi$ ) $\rightarrow$ BTD( $\pi^*$ )              |
| 476(533) | 19320(0.103) | HOMO-4( $\beta$ ) $\rightarrow$ LUMO( $\beta$ )(0.57)     | acac( $\pi$ )/Ru(d $\pi$ ) $\rightarrow$ BTD( $\pi^*$ )              |

|                    |                         |                                                                                                                                                                                   |                                                                                                                                                                                 |
|--------------------|-------------------------|-----------------------------------------------------------------------------------------------------------------------------------------------------------------------------------|---------------------------------------------------------------------------------------------------------------------------------------------------------------------------------|
| 277(350)           | 18320(0.049)            | HOMO-4( $\alpha$ ) $\rightarrow$ LUMO+1( $\alpha$ )(0.31)<br>HOMO-5( $\alpha$ ) $\rightarrow$ LUMO+6( $\alpha$ )(0.28)<br>HOMO-5( $\beta$ ) $\rightarrow$ LUMO+7( $\beta$ )(0.27) | acac( $\pi$ )/Ru(d $\pi$ ) $\rightarrow$ BTD( $\pi^*$ )<br>acac( $\pi$ )/Ru(d $\pi$ ) $\rightarrow$ acac( $\pi^*$ )<br>acac( $\pi$ )/Ru(d $\pi$ ) $\rightarrow$ acac( $\pi^*$ ) |
| $4^2-$ ( $S=1$ )   |                         |                                                                                                                                                                                   |                                                                                                                                                                                 |
| 747(768)           | 22080(0.091)            | HOMO( $\beta$ ) $\rightarrow$ LUMO+1( $\beta$ )(0.57)<br>HOMO-7( $\alpha$ ) $\rightarrow$ LUMO+1( $\alpha$ )(0.33)                                                                | BTD( $\pi$ )/Ru(d $\pi$ ) $\rightarrow$ BTD( $\pi^*$ )<br>Ru(d $\pi$ ) $\rightarrow$ BTD( $\pi^*$ )                                                                             |
| 680(681)<br>(658)  | 22720(0.036)<br>(0.051) | HOMO-1( $\beta$ ) $\rightarrow$ LUMO+1( $\beta$ )(0.69)<br>HOMO( $\beta$ ) $\rightarrow$ LUMO+2( $\beta$ )(0.45)<br>HOMO( $\beta$ ) $\rightarrow$ LUMO+3( $\beta$ )(0.36)         | Ru(d $\pi$ ) $\rightarrow$ BTD( $\pi^*$ )<br>BTD( $\pi$ )/Ru(d $\pi$ ) $\rightarrow$ BTD( $\pi^*$ )<br>BTD( $\pi$ )/Ru(d $\pi$ ) $\rightarrow$ BTD( $\pi^*$ )                   |
| 504(536)           | 19010(0.077)            | HOMO-2( $\beta$ ) $\rightarrow$ LUMO+2( $\beta$ )(0.42)<br>HOMO-6( $\beta$ ) $\rightarrow$ LUMO+1( $\beta$ )(0.23)                                                                | Ru(d $\pi$ ) $\rightarrow$ BTD( $\pi^*$ )<br>acac( $\pi$ )/Ru(d $\pi$ ) $\rightarrow$ BTD( $\pi^*$ )                                                                            |
| 248(356)           | 55080(0.066)            | HOMO-7( $\beta$ ) $\rightarrow$ LUMO+6( $\beta$ )(0.35)<br>HOMO-9( $\alpha$ ) $\rightarrow$ LUMO+3( $\alpha$ )(0.26)                                                              | Ru(d $\pi$ ) $\rightarrow$ acac( $\pi^*$ )<br>Ru(d $\pi$ ) $\rightarrow$ acac( $\pi^*$ )                                                                                        |
| $4^3-$ ( $S=3/2$ ) |                         |                                                                                                                                                                                   |                                                                                                                                                                                 |
| 820(764)           | 24320(0.133)            | HOMO( $\beta$ ) $\rightarrow$ LUMO( $\beta$ )(0.51)                                                                                                                               | BTD( $\pi$ )/Ru(d $\pi$ ) $\rightarrow$ BTD( $\pi^*$ )/<br>acac( $\pi^*$ )                                                                                                      |
| 630(647)<br>(631)  | 23190(0.032)<br>(0.033) | HOMO-10( $\alpha$ ) $\rightarrow$ LUMO( $\alpha$ )(0.50)<br>HOMO-9( $\alpha$ ) $\rightarrow$ LUMO( $\alpha$ )(0.24)<br>HOMO-2( $\beta$ ) $\rightarrow$ LUMO+1( $\beta$ )(0.51)    | Ru(d $\pi$ ) $\rightarrow$ BTD( $\pi^*$ )<br>Ru(d $\pi$ ) $\rightarrow$ BTD( $\pi^*$ )<br>Ru(d $\pi$ ) $\rightarrow$ BTD( $\pi^*$ )/acac( $\pi^*$ )                             |
| 482(542)           | 22980(0.038)            | HOMO-1( $\beta$ ) $\rightarrow$ LUMO+2( $\beta$ )(0.43)<br><br>HOMO-1( $\alpha$ ) $\rightarrow$ LUMO+11( $\alpha$ )(0.24)                                                         | BTD( $\pi$ )/Ru(d $\pi$ ) $\rightarrow$ BTD( $\pi^*$ )/<br>acac( $\pi^*$ )<br>BTD( $\pi$ ) $\rightarrow$ BTD( $\pi^*$ )/acac( $\pi^*$ )/<br>Ru(d $\pi$ )                        |
| 284(389)           | 19420(0.055)            | HOMO-7( $\alpha$ ) $\rightarrow$ LUMO+5( $\alpha$ )(0.39)<br>HOMO-4( $\beta$ ) $\rightarrow$ LUMO+8( $\beta$ )(0.36)                                                              | Ru(d $\pi$ ) $\rightarrow$ acac( $\pi^*$ )<br>Ru(d $\pi$ ) $\rightarrow$ acac( $\pi^*$ )                                                                                        |
